# Supplementary material for: Mapping the genetic evolutionary timeline of human neural and cognitive traits
Source: bioRxiv or medRxiv preprint supplement (doi:10.1101/2023.02.05.525539), 2023-09-28
Supplement: Supplementary file [file media-2.pdf]

| Domain              | N SNPs | Median age | Age 75% upper bound | Age 25% lower bound | Z-score | P value | Bonferroni |
|---------------------|--------|------------|---------------------|---------------------|---------|---------|------------|
| Ophthalmological    | 823    | 30484      | 501546              | 19323               | -18.37  | 2.1E-75 | 1          |
| Psychiatric         | 4022   | 412639     | 1034993             | 49571               | -17.00  | 7.8E-65 | 1          |
| Nutritional         | 929    | 429993     | 1050270             | 67491               | -7.55   | 4.2E-14 | 1          |
| Environment         | 1161   | 473478     | 1024142             | 70585               | -6.89   | 5.7E-12 | 1          |
| Activities          | 1784   | 514085     | 1051021             | 68298               | -6.84   | 7.8E-12 | 1          |
| Reproduction        | 1226   | 525596     | 1052098             | 60377               | -5.21   | 1.8E-07 | 1          |
| Social Interactions | 252    | 393951     | 858820              | 62358               | -4.49   | 7.1E-06 | 1          |
| Neoplasms           | 378    | 593145     | 990794              | 126391              | -1.61   | 1.1E-01 | 0          |
| Cognitive           | 600    | 611820     | 1083358             | 84270               | -1.54   | 1.2E-01 | 0          |
| Dermatological      | 1833   | 643843     | 1075185             | 114835              | -1.30   | 1.9E-01 | 0          |
| Gastrointestinal    | 694    | 635919     | 1060403             | 164244              | -1.01   | 3.1E-01 | 0          |
| Aging               | 2      | 373150     | 415107              | 331193              | -0.82   | 4.1E-01 | 0          |
| Mortality           | 147    | 617010     | 1045174             | 103406              | -0.69   | 4.9E-01 | 0          |
| Hematological       | 57     | 595340     | 1052398             | 214394              | -0.57   | 5.7E-01 | 0          |
| Ear, Nose, Throat   | 52     | 642079     | 1078489             | 96134               | -0.22   | 8.2E-01 | 0          |
| Body Structures     | 91     | 697705     | 1094841             | 139461              | 0.26    | 7.9E-01 | 0          |
| Infection           | 6      | 752978     | 1142349             | 462069              | 0.32    | 7.5E-01 | 0          |
| Muscular            | 3      | 782185     | 1153615             | 691033              | 0.33    | 7.4E-01 | 0          |
| Cell                | 289    | 736593     | 1116948             | 213623              | 1.08    | 2.8E-01 | 0          |
| Connective Tissue   | 95     | 824043     | 1177130             | 320071              | 1.51    | 1.3E-01 | 0          |
| Endocrine           | 873    | 757165     | 1092063             | 359748              | 2.49    | 1.3E-02 | 0          |
| Environmental       | 599    | 803743     | 1150583             | 266960              | 3.21    | 1.3E-03 | 1          |
| Neurological        | 836    | 800795     | 1174863             | 170011              | 3.69    | 2.2E-04 | 1          |
| Respiratory         | 1767   | 760510     | 1154128             | 208657              | 3.75    | 1.7E-04 | 1          |

|                |       |        |         |        |       |         |   |
|----------------|-------|--------|---------|--------|-------|---------|---|
| Cardiovascular | 2010  | 756169 | 1134757 | 225276 | 3.79  | 1.5E-04 | 1 |
| Immunological  | 4197  | 747780 | 1134575 | 207559 | 5.05  | 4.3E-07 | 1 |
| Skeletal       | 4452  | 759056 | 1142788 | 205903 | 6.05  | 1.5E-09 | 1 |
| Metabolic      | 10287 | 780323 | 1170134 | 196880 | 12.52 | 5.9E-36 | 1 |

| Chapter                                                                          | N SNPs | Median age | Age 75% upper bound | Age 25% lower bound | Z-score | P value  | Bonferroni |
|----------------------------------------------------------------------------------|--------|------------|---------------------|---------------------|---------|----------|------------|
| Mental and Behavioural Disorders                                                 | 2331   | 111560     | 803943              | 25013               | -26.63  | 3.3E-156 | 1          |
| The Eye, Ear and Related Structures                                              | 756    | 26744      | 381293              | 18411               | -17.72  | 2.8E-70  | 1          |
| Self-Care                                                                        | 2612   | 487959     | 1049054             | 67786               | -9.67   | 4.2E-22  | 1          |
| Major Life Areas                                                                 | 1099   | 473045     | 1018917             | 70947               | -6.73   | 1.7E-11  | 1          |
| Genitourinary and Reproductive Functions                                         | 1108   | 501423     | 1048990             | 57223               | -5.86   | 4.6E-09  | 1          |
| Interpersonal Interactions and Relationships                                     | 252    | 393951     | 858820              | 62358               | -4.50   | 6.6E-06  | 1          |
| Skin and Related Structures                                                      | 1066   | 548430     | 1046899             | 79302               | -4.08   | 4.5E-05  | 1          |
| Injuries to the Wrist or Hand                                                    | 12     | 89668      | 637349              | 43850               | -2.22   | 2.6E-02  | 0          |
| Domestic Life                                                                    | 9      | 87761      | 1197513             | 64125               | -1.92   | 5.5E-02  | 0          |
| Pregnancy, Childbirth and the Puerperium                                         | 11     | 109982     | 790909              | 37530               | -1.92   | 5.5E-02  | 0          |
| Benign Neoplasms                                                                 | 13     | 196128     | 895060              | 112635              | -1.77   | 7.7E-02  | 0          |
| Mortality                                                                        | 126    | 534155     | 1013774             | 102262              | -1.61   | 1.1E-01  | 0          |
| Malignant Neoplasms                                                              | 366    | 593145     | 990794              | 137758              | -1.57   | 1.2E-01  | 0          |
| Certain Conditions Originating in the Perinatal Period                           | 1      | 40478      | 40478               | 40478               | -1.22   | 2.2E-01  | 0          |
| Voice and Speech Functions                                                       | 1      | 69269      | 69269               | 69269               | -1.15   | 2.5E-01  | 0          |
| Diseases of the Digestive System                                                 | 693    | 637523     | 1060418             | 166442              | -0.97   | 3.3E-01  | 0          |
| External Causes of Morbidity and Mortality                                       | 1      | 230508     | 230508              | 230508              | -0.86   | 3.9E-01  | 0          |
| Structures of the Cardiovascular, Immunological and Respiratory Systems          | 14     | 530470     | 774106              | 230354              | -0.53   | 6.0E-01  | 0          |
| Persons Encountering Health Services in Circumstances related to Reproduction    | 2      | 495450     | 726366              | 264534              | -0.49   | 6.2E-01  | 0          |
| Mobility                                                                         | 15     | 572478     | 791724              | 344053              | -0.37   | 7.1E-01  | 0          |
| Communication                                                                    | 62     | 633110     | 1099613             | 95419               | -0.31   | 7.6E-01  | 0          |
| Diseases of the Genitourinary System                                             | 92     | 642649     | 1082311             | 169460              | -0.30   | 7.6E-01  | 0          |
| Neuromusculoskeletal and Movement-Related Functions                              | 5      | 599880     | 782185              | 370965              | -0.15   | 8.8E-01  | 0          |
| Symptoms, Signs and Abnormal Clinical and Laboratory Findings, Not Elsewhere C   | 29     | 651273     | 1186478             | 258348              | -0.08   | 9.4E-01  | 0          |
| Factors Influencing Health Status and Contact with Health Services               | 12     | 656330     | 1023916             | 166671              | 0.01    | 9.9E-01  | 0          |
| Diseases of the Eye and Adnexa                                                   | 72     | 680315     | 1062517             | 140268              | 0.08    | 9.4E-01  | 0          |
| Structures Related to Genitourinary and Reproductive Functions                   | 2      | 721569     | 763804              | 679333              | 0.10    | 9.2E-01  | 0          |
| Certain Infectious and Parasitic Diseases                                        | 2      | 730364     | 870164              | 590563              | 0.13    | 8.9E-01  | 0          |
| Structure Involved in Voice and Speech                                           | 61     | 697030     | 1082750             | 113557              | 0.19    | 8.5E-01  | 0          |
| Disease of the Respiratory System                                                | 189    | 701663     | 1147733             | 142038              | 0.38    | 7.0E-01  | 0          |
| Diseases of the Skin and Subcutaneous Tissue                                     | 61     | 750523     | 1250975             | 157010              | 0.64    | 5.2E-01  | 0          |
| Injury, Poisoning and Certain Other Consequences of External Causes              | 32     | 804538     | 1073765             | 208062              | 0.80    | 4.2E-01  | 0          |
| Certain conditions originating in the perinatal period                           | 7      | 924228     | 1220385             | 660623              | 0.82    | 4.1E-01  | 0          |
| Congenital Malformations, Deformations and Chromosomal Abnormalities             | 5      | 1031778    | 1061213             | 78554               | 1.05    | 2.9E-01  | 0          |
| Persons with Potential Health Hazards Related to Family and Personal History and | 21     | 890533     | 1077720             | 223191              | 1.08    | 2.8E-01  | 0          |
| Function of DNA                                                                  | 289    | 736593     | 1116948             | 213623              | 1.10    | 2.7E-01  | 0          |
| Diseases of the Respiratory System                                               | 243    | 749068     | 1103885             | 241583              | 1.19    | 2.3E-01  | 0          |
| Diseases of the Musculoskeletal System and Connective Tissue                     | 234    | 755908     | 1178558             | 313889              | 1.28    | 2.0E-01  | 0          |
| Structures of the Nervous System                                                 | 574    | 728523     | 1149092             | 160080              | 1.31    | 1.9E-01  | 0          |

|                                                                                  |       |         |         |         |       |         |   |
|----------------------------------------------------------------------------------|-------|---------|---------|---------|-------|---------|---|
| Persons Encountering Health Status and Contact with Health Services              | 1     | 1529998 | 1529998 | 1529998 | 1.56  | 1.2E-01 | 0 |
| Sensory Functions and Pain                                                       | 116   | 848390  | 1136323 | 168780  | 1.92  | 5.5E-02 | 0 |
| Diseases of the Circulatory System                                               | 829   | 755865  | 1131780 | 301905  | 2.39  | 1.7E-02 | 0 |
| Endocrine, Nutritional and Metabolic Diseases                                    | 912   | 753879  | 1112101 | 314569  | 2.45  | 1.4E-02 | 0 |
| Functions of the Skin and Related Structures                                     | 718   | 774485  | 1109228 | 299151  | 2.73  | 6.3E-03 | 0 |
| Products and Technology                                                          | 651   | 789108  | 1147636 | 201948  | 3.02  | 2.6E-03 | 0 |
| Diseases of the Nervous System                                                   | 207   | 932355  | 1242859 | 276185  | 3.79  | 1.5E-04 | 1 |
| Mental Functions                                                                 | 2315  | 755888  | 1169583 | 114127  | 4.02  | 5.8E-05 | 1 |
| Structures Related to Movement                                                   | 4302  | 761628  | 1142566 | 203376  | 6.15  | 7.7E-10 | 1 |
| Functions of the Cardiovascular, Haematological, Immunological and Respiratory S | 6844  | 753774  | 1141570 | 207351  | 7.31  | 2.8E-13 | 1 |
| Functions of the Digestive, Metabolic and Endocrine Systems                      | 10300 | 780269  | 1168384 | 200705  | 12.61 | 1.9E-36 | 1 |

| Subchapter                                                     | N SNPs | Median age | Age 75% upper bound | Age 25% lower bound | Z-score | P value | Bonferroni |
|----------------------------------------------------------------|--------|------------|---------------------|---------------------|---------|---------|------------|
| Structure of Eyeball                                           | 756    | 26744      | 381293              | 18411               | -17.74  | 2.1E-70 | 1          |
| Depressive Episode                                             | 745    | 27526      | 123864              | 15392               | -17.71  | 3.6E-70 | 1          |
| Mental and Behavioural Disorders Due to Use of Alcohol         | 715    | 72959      | 581134              | 21394               | -16.48  | 5.3E-61 | 1          |
| Sexual Functions                                               | 500    | 79911      | 696678              | 21077               | -13.51  | 1.4E-41 | 1          |
| Work and Employment                                            | 346    | 99706      | 531414              | 25710               | -10.75  | 5.8E-27 | 1          |
| Food                                                           | 929    | 429993     | 1050270             | 67491               | -7.48   | 7.6E-14 | 1          |
| Looking After One's Health                                     | 1702   | 510761     | 1049033             | 67837               | -6.86   | 6.7E-12 | 1          |
| Memory Functions                                               | 85     | 155176     | 550950              | 47118               | -4.85   | 1.2E-06 | 1          |
| Family Relationships                                           | 125    | 293003     | 765840              | 47668               | -4.28   | 1.9E-05 | 1          |
| Structure of Areas of Skin                                     | 567    | 516270     | 1018909             | 69258               | -3.85   | 1.2E-04 | 1          |
| Parent-Child Relationships                                     | 41     | 124491     | 467298              | 61860               | -3.53   | 4.2E-04 | 0          |
| Assets                                                         | 52     | 242926     | 1078069             | 57849               | -3.16   | 1.6E-03 | 0          |
| Malignant Neoplasms of Breast                                  | 216    | 493833     | 975567              | 101913              | -2.68   | 7.3E-03 | 0          |
| Carpal Tunnel Syndrome                                         | 12     | 89668      | 637349              | 43850               | -2.20   | 2.7E-02 | 0          |
| Mental Functions, Unspecified                                  | 4      | 48181      | 350559              | 36350               | -1.82   | 6.9E-02 | 0          |
| Benign Neoplasm of Colon, Rectum, Anus and Anal Canal          | 13     | 196128     | 895060              | 112635              | -1.80   | 7.1E-02 | 0          |
| Preterm Labour and Delivery                                    | 2      | 21325      | 24569               | 18081               | -1.76   | 7.9E-02 | 0          |
| Acquisition of Necessities                                     | 4      | 71768      | 392898              | 51683               | -1.71   | 8.7E-02 | 0          |
| Structure of Hair                                              | 516    | 600458     | 1056409             | 93271               | -1.68   | 9.2E-02 | 0          |
| All-Cause Mortality                                            | 126    | 534155     | 1013774             | 102262              | -1.59   | 1.1E-01 | 0          |
| Education                                                      | 600    | 609431     | 1126788             | 95024               | -1.57   | 1.2E-01 | 0          |
| Mental and Behavioural Disorders Due to Use of Cannabinoid     | 9      | 204782     | 1218098             | 50761               | -1.52   | 1.3E-01 | 0          |
| Unspecified                                                    | 5      | 123446     | 1197513             | 64740               | -1.48   | 1.4E-01 | 0          |
| Noninfective enteritis and Colitis                             | 511    | 615780     | 1045638             | 198361              | -1.33   | 1.8E-01 | 0          |
| Presence of Other Functional Implants                          | 1      | 23028      | 23028               | 23028               | -1.25   | 2.1E-01 | 0          |
| Dislocation, Sprain and Strain of Joints and Ligaments of Knee | 1      | 26829      | 26829               | 26829               | -1.24   | 2.1E-01 | 0          |
| Disorders of eyelid, lacrimal system and orbit                 | 2      | 219257     | 228872              | 209641              | -1.24   | 2.1E-01 | 0          |
| Injury of Muscle and Tendon at Shoulder and Upper Arm Level    | 1      | 34759      | 34759               | 34759               | -1.24   | 2.2E-01 | 0          |
| Genitourinary and Reproductive Functions, Unspecified          | 1      | 26754      | 26754               | 26754               | -1.23   | 2.2E-01 | 0          |
| Problems Related to Upbringing                                 | 14     | 364589     | 708594              | 50867               | -1.22   | 2.2E-01 | 0          |
| Digestive System Disorders of Fetus and Newborn                | 1      | 40478      | 40478               | 40478               | -1.21   | 2.3E-01 | 0          |
| Structure of Nose                                              | 1      | 69269      | 69269               | 69269               | -1.17   | 2.4E-01 | 0          |
| Gingivitis and Periodontal Diseases                            | 1      | 62660      | 62660               | 62660               | -1.17   | 2.4E-01 | 0          |
| Bipolar Affective Disorder/Depressive Episode                  | 1      | 66277      | 66277               | 66277               | -1.16   | 2.5E-01 | 0          |
| Abdominal and Pelvic Pain                                      | 1      | 68013      | 68013               | 68013               | -1.16   | 2.5E-01 | 0          |
| Cardiomyopathy                                                 | 1      | 76263      | 76263               | 76263               | -1.15   | 2.5E-01 | 0          |
| Coxarthrosis [Anthrrosis of Hip]                               | 10     | 343796     | 693370              | 106550              | -1.12   | 2.6E-01 | 0          |
| Mental Functions of Language                                   | 5      | 252948     | 270908              | 247992              | -1.12   | 2.6E-01 | 0          |
| Haematological System Functions                                | 26     | 452849     | 863486              | 86642               | -1.11   | 2.7E-01 | 0          |
| Disorders of Lens                                              | 2      | 277362     | 357695              | 197029              | -1.07   | 2.8E-01 | 0          |

|                                                              |      |        |         |        |       |         |   |
|--------------------------------------------------------------|------|--------|---------|--------|-------|---------|---|
| Psoriasis                                                    | 5    | 269828 | 367203  | 157010 | -1.05 | 2.9E-01 | 0 |
| Gout                                                         | 2    | 288515 | 415423  | 161608 | -1.05 | 3.0E-01 | 0 |
| Personal History of Certain Other Diseases                   | 3    | 225979 | 1377815 | 131869 | -1.04 | 3.0E-01 | 0 |
| Mental and Behavioural Disorders Due to Use of Tobacco       | 540  | 632559 | 1152929 | 96316  | -0.98 | 3.3E-01 | 0 |
| Functions of Joints and Bones                                | 2    | 314849 | 342907  | 286791 | -0.97 | 3.3E-01 | 0 |
| Acquired Absence of Organs, Not Elsewhere Classified         | 6    | 351934 | 726293  | 99518  | -0.97 | 3.3E-01 | 0 |
| Disorders of Gallbladder, Biliary Tract and Pancreas         | 1    | 160339 | 160339  | 160339 | -0.97 | 3.3E-01 | 0 |
| General Metabolic Functions                                  | 1084 | 648105 | 1075349 | 149713 | -0.86 | 3.9E-01 | 0 |
| Intestinal Malabsorption                                     | 38   | 533051 | 1057677 | 126359 | -0.86 | 3.9E-01 | 0 |
| Fibrosis and Cirrhosis of Liver                              | 17   | 471018 | 837185  | 72818  | -0.82 | 4.1E-01 | 0 |
| Malignant Neoplasms of Ovary                                 | 2    | 385889 | 404051  | 367727 | -0.78 | 4.3E-01 | 0 |
| Malignant Neoplasms of Skin                                  | 47   | 564945 | 902261  | 132566 | -0.72 | 4.7E-01 | 0 |
| Structure of Pelvic Region                                   | 41   | 559165 | 997142  | 108174 | -0.72 | 4.7E-01 | 0 |
| Other disorders of pigmentation                              | 5    | 433813 | 626938  | 424865 | -0.61 | 5.4E-01 | 0 |
| Malignant Neoplasms of Pancreas                              | 3    | 415423 | 739820  | 277350 | -0.58 | 5.6E-01 | 0 |
| Pain in Chest                                                | 4    | 460186 | 939378  | 75222  | -0.58 | 5.6E-01 | 0 |
| Malignant Neoplasms of Male Genital Organs                   | 26   | 563086 | 1018012 | 155701 | -0.56 | 5.8E-01 | 0 |
| Gastro-Oesophageal Reflux Disease                            | 2    | 492105 | 716252  | 267957 | -0.51 | 6.1E-01 | 0 |
| Structure of Cardiovascular System                           | 14   | 530470 | 774106  | 230354 | -0.51 | 6.1E-01 | 0 |
| Outcome of Delivery                                          | 2    | 495450 | 726366  | 264534 | -0.50 | 6.2E-01 | 0 |
| Dementia in Alzheimer Disease                                | 2    | 497100 | 735271  | 258929 | -0.48 | 6.3E-01 | 0 |
| Failure of Genital Response                                  | 1    | 453883 | 453883  | 453883 | -0.43 | 6.6E-01 | 0 |
| Conversation and Use of Communication Devices and Techniques | 61   | 614263 | 1101180 | 90711  | -0.42 | 6.7E-01 | 0 |
| Procreation Functions                                        | 64   | 621131 | 1114773 | 79091  | -0.42 | 6.7E-01 | 0 |
| Obesity                                                      | 38   | 602585 | 1028234 | 283569 | -0.41 | 6.9E-01 | 0 |
| Diseases of Pulp and Periapical Tissues                      | 10   | 551380 | 865095  | 379969 | -0.38 | 7.0E-01 | 0 |
| Walking and Moving                                           | 9    | 552143 | 836723  | 398870 | -0.35 | 7.3E-01 | 0 |
| Glaucoma                                                     | 65   | 633208 | 1048700 | 143303 | -0.30 | 7.6E-01 | 0 |
| Renal Failure                                                | 92   | 642649 | 1082311 | 169460 | -0.29 | 7.7E-01 | 0 |
| Psychomotor Functions                                        | 39   | 627113 | 991665  | 187568 | -0.26 | 8.0E-01 | 0 |
| Hearing Functions                                            | 52   | 642079 | 1078489 | 96134  | -0.20 | 8.4E-01 | 0 |
| Malignant Neoplasms of Colon                                 | 10   | 616168 | 981138  | 374662 | -0.16 | 8.7E-01 | 0 |
| Personal History of Malignant Neoplasm                       | 1    | 609465 | 609465  | 609465 | -0.14 | 8.9E-01 | 0 |
| Gonarthrosis [Arthrosis of Knee]                             | 3    | 614298 | 1249150 | 476524 | -0.11 | 9.1E-01 | 0 |
| Multiple Sclerosis                                           | 18   | 636436 | 1019228 | 117572 | -0.10 | 9.2E-01 | 0 |
| Abnormalities of Breathing                                   | 24   | 651598 | 1131414 | 293286 | -0.07 | 9.5E-01 | 0 |
| Presence of Other Device                                     | 3    | 626783 | 945589  | 324752 | -0.06 | 9.5E-01 | 0 |
| Informal Social Relationships                                | 87   | 667720 | 1213893 | 117543 | -0.06 | 9.5E-01 | 0 |
| Other Hypothyroidism                                         | 47   | 665375 | 1118659 | 398794 | -0.05 | 9.6E-01 | 0 |
| Moving Around Using Transportation                           | 6    | 637646 | 734011  | 210343 | -0.05 | 9.6E-01 | 0 |
| Muscle Power Functions                                       | 2    | 691033 | 736609  | 645456 | 0.03  | 9.7E-01 | 0 |

|                                                                                    |     |         |         |         |      |         |   |
|------------------------------------------------------------------------------------|-----|---------|---------|---------|------|---------|---|
| Breast and Nipple                                                                  | 2   | 721569  | 763804  | 679333  | 0.08 | 9.3E-01 | 0 |
| Disorders of Puberty, Not Elsewhere Classified                                     | 95  | 680763  | 1100234 | 148938  | 0.09 | 9.3E-01 | 0 |
| Malignant Neoplasms of Brain                                                       | 23  | 689958  | 1039025 | 281480  | 0.13 | 9.0E-01 | 0 |
| Other Bacterial Diseases                                                           | 2   | 730364  | 870164  | 590563  | 0.13 | 9.0E-01 | 0 |
| Other degenerative diseases of the nervous system                                  | 3   | 719763  | 804408  | 387647  | 0.17 | 8.7E-01 | 0 |
| Structure of Mouth                                                                 | 61  | 697030  | 1082750 | 113557  | 0.19 | 8.5E-01 | 0 |
| Diabetes Mellitus                                                                  | 71  | 698965  | 1085338 | 127300  | 0.25 | 8.0E-01 | 0 |
| Discomfort associated with menopause                                               | 8   | 744573  | 1367268 | 434703  | 0.31 | 7.6E-01 | 0 |
| Sensations Associated with Genital and Reproductive Functions                      | 4   | 762909  | 983202  | 424111  | 0.31 | 7.6E-01 | 0 |
| Thyrotoxicosis                                                                     | 10  | 740721  | 1123445 | 424717  | 0.31 | 7.5E-01 | 0 |
| Pain in Abdomen and Pelvic                                                         | 1   | 845510  | 845510  | 845510  | 0.32 | 7.5E-01 | 0 |
| Schizophrenia/Bipolar Affective Disorder                                           | 152 | 699801  | 1168273 | 96495   | 0.33 | 7.4E-01 | 0 |
| Malignant Neoplasms                                                                | 48  | 723851  | 1024151 | 322100  | 0.36 | 7.2E-01 | 0 |
| Vitiligo                                                                           | 34  | 731529  | 1131053 | 99137   | 0.38 | 7.0E-01 | 0 |
| Conduct Disorder                                                                   | 2   | 830614  | 1216454 | 444773  | 0.39 | 6.9E-01 | 0 |
| Other Arthrosis                                                                    | 84  | 712899  | 1059573 | 205613  | 0.40 | 6.9E-01 | 0 |
| Vasomotor and Allergic Rhinitis                                                    | 203 | 701663  | 1156256 | 141397  | 0.42 | 6.8E-01 | 0 |
| Vascular Syndromes of Brain in Cerebrovascular Diseases                            | 1   | 928078  | 928078  | 928078  | 0.46 | 6.5E-01 | 0 |
| Endocrine Gland Functions                                                          | 115 | 719743  | 928501  | 412455  | 0.51 | 6.1E-01 | 0 |
| Other Congenital Malformations of the Digestive System                             | 6   | 818603  | 1039886 | 334516  | 0.53 | 5.9E-01 | 0 |
| Migraine                                                                           | 13  | 800740  | 1061773 | 406448  | 0.54 | 5.9E-01 | 0 |
| Mild Mental Retardation                                                            | 37  | 755425  | 1081700 | 274398  | 0.55 | 5.8E-01 | 0 |
| Unspecified Haematuria                                                             | 4   | 841234  | 1251904 | 394397  | 0.56 | 5.7E-01 | 0 |
| Inguinal Hernia                                                                    | 14  | 820809  | 1125520 | 73491   | 0.67 | 5.0E-01 | 0 |
| Systemic Lupus Erythematosus                                                       | 61  | 756663  | 1285880 | 293270  | 0.68 | 5.0E-01 | 0 |
| Producing Body Language                                                            | 1   | 1052485 | 1052485 | 1052485 | 0.71 | 4.8E-01 | 0 |
| Disorders of Lipoprotein Metabolism and Other lipidaemias                          | 21  | 818555  | 1079695 | 214394  | 0.73 | 4.6E-01 | 0 |
| Other Diseases of Respiratory System                                               | 6   | 873483  | 1013531 | 497613  | 0.74 | 4.6E-01 | 0 |
| Asthma                                                                             | 218 | 724161  | 1100698 | 243253  | 0.79 | 4.3E-01 | 0 |
| Presence of Cardiac and Vascular Implants and Grafts                               | 9   | 890533  | 1034870 | 678693  | 0.80 | 4.3E-01 | 0 |
| Hyperkinetic Disorders                                                             | 11  | 892855  | 1212943 | 497249  | 0.84 | 4.0E-01 | 0 |
| Disorders related to length of gestation and fetal growth                          | 7   | 924228  | 1220385 | 660623  | 0.85 | 4.0E-01 | 0 |
| Persons with Potential Health Hazards Related to Socioeconomic and Psychosocial Ci | 3   | 1023008 | 1167565 | 854443  | 0.88 | 3.8E-01 | 0 |
| Structure of hair                                                                  | 2   | 1008821 | 1495008 | 522634  | 0.89 | 3.8E-01 | 0 |
| Cholelithiasis                                                                     | 15  | 881008  | 1127658 | 80472   | 0.89 | 3.7E-01 | 0 |
| Malignant Neoplasms of Lung                                                        | 3   | 1026643 | 1160283 | 980650  | 0.90 | 3.7E-01 | 0 |
| Superficial Injuries Involving Multiple Body Regions                               | 30  | 832468  | 1106505 | 287249  | 0.93 | 3.5E-01 | 0 |
| Personal History of Medical Treatment                                              | 3   | 1053010 | 1791330 | 1049563 | 0.96 | 3.4E-01 | 0 |
| Thyroiditis                                                                        | 75  | 783140  | 1139713 | 327709  | 0.98 | 3.3E-01 | 0 |
| Family History of Certain Disabilities and Chronic Diseases Leading to Disablement | 6   | 964495  | 1123575 | 380211  | 1.01 | 3.1E-01 | 0 |
| Undescended Testicle                                                               | 5   | 1031778 | 1061213 | 78554   | 1.06 | 2.9E-01 | 0 |

|                                                                                   |     |         |         |         |      |         |   |
|-----------------------------------------------------------------------------------|-----|---------|---------|---------|------|---------|---|
| Protein Level                                                                     | 289 | 736593  | 1116948 | 213623  | 1.09 | 2.8E-01 | 0 |
| Malignant Neoplasms of Stomach                                                    | 4   | 1026389 | 1326258 | 716506  | 1.11 | 2.7E-01 | 0 |
| Schizophrenia                                                                     | 196 | 751410  | 1219578 | 126049  | 1.12 | 2.6E-01 | 0 |
| Diverticular Disease of Intestine                                                 | 76  | 797933  | 1140625 | 157939  | 1.13 | 2.6E-01 | 0 |
| Angina Pectoris                                                                   | 26  | 881300  | 1172282 | 321236  | 1.14 | 2.5E-01 | 0 |
| Hypertrichosis                                                                    | 3   | 1145635 | 1332681 | 912813  | 1.19 | 2.3E-01 | 0 |
| Atrial Fibrillation and Flutter                                                   | 186 | 759971  | 1150789 | 337274  | 1.21 | 2.3E-01 | 0 |
| Pervasive Developmental Disorders                                                 | 3   | 1164070 | 1190443 | 970190  | 1.22 | 2.2E-01 | 0 |
| Bipolar Affective Disorder                                                        | 12  | 984339  | 1212962 | 495684  | 1.27 | 2.0E-01 | 0 |
| Other Cataract                                                                    | 6   | 1048938 | 1397449 | 342022  | 1.27 | 2.0E-01 | 0 |
| Functions of the Cardiovascular System                                            | 6   | 1052319 | 1121252 | 894963  | 1.28 | 2.0E-01 | 0 |
| Heart Functions                                                                   | 530 | 730185  | 1152666 | 204447  | 1.31 | 1.9E-01 | 0 |
| Structure of Brain                                                                | 574 | 728523  | 1149092 | 160080  | 1.33 | 1.8E-01 | 0 |
| Higher-Level Cognitive Functions                                                  | 443 | 738595  | 1133618 | 94991   | 1.40 | 1.6E-01 | 0 |
| Chronic Ischaemic Heart Disease                                                   | 425 | 740605  | 1120763 | 322275  | 1.40 | 1.6E-01 | 0 |
| Structure of Head and Neck Region                                                 | 59  | 853965  | 1291146 | 404181  | 1.44 | 1.5E-01 | 0 |
| Hematological System Functions                                                    | 32  | 917845  | 1122026 | 347349  | 1.45 | 1.5E-01 | 0 |
| Dorsopathies                                                                      | 16  | 1009141 | 1215242 | 412496  | 1.53 | 1.3E-01 | 0 |
| Control of Voluntary Movement Functions                                           | 1   | 1525045 | 1525045 | 1525045 | 1.58 | 1.1E-01 | 0 |
| Alzheimer disease                                                                 | 39  | 918405  | 1219690 | 124168  | 1.58 | 1.1E-01 | 0 |
| Problems Related to Lifestyle                                                     | 1   | 1529998 | 1529998 | 1529998 | 1.60 | 1.1E-01 | 0 |
| Obstruction of bile duct                                                          | 3   | 1330175 | 1602635 | 1157248 | 1.62 | 1.0E-01 | 0 |
| Epilepsy                                                                          | 21  | 1021760 | 1437625 | 722640  | 1.70 | 9.0E-02 | 0 |
| Structures Related to the Genitourinary and Reproductive Systems, Other Specified | 1   | 1613123 | 1613123 | 1613123 | 1.76 | 7.9E-02 | 0 |
| Other Rheumatoid Arthritis                                                        | 66  | 886414  | 1181998 | 439329  | 1.77 | 7.7E-02 | 0 |
| Essential (Primary) Hypertension                                                  | 210 | 796706  | 1132637 | 155420  | 1.78 | 7.5E-02 | 0 |
| Diaphragmatic Hernia                                                              | 3   | 1398910 | 1434606 | 1106865 | 1.80 | 7.1E-02 | 0 |
| Structure of Trunk                                                                | 37  | 955958  | 1314745 | 427510  | 1.81 | 7.1E-02 | 0 |
| Type 2 Diabetes Mellitus                                                          | 534 | 755668  | 1098538 | 363788  | 1.95 | 5.1E-02 | 0 |
| Parkinson Disease                                                                 | 28  | 1028789 | 1293166 | 481049  | 1.99 | 4.7E-02 | 0 |
| Spinal Muscular Strophy and Related Syndrome                                      | 10  | 1199350 | 1369743 | 217373  | 2.03 | 4.2E-02 | 0 |
| Atopic Dermatitis                                                                 | 22  | 1084311 | 1379780 | 553161  | 2.08 | 3.7E-02 | 0 |
| Sensation of Pain                                                                 | 59  | 948753  | 1173568 | 241821  | 2.13 | 3.3E-02 | 0 |
| Type 1 Diabetes Mellitus                                                          | 79  | 922743  | 1205271 | 390338  | 2.26 | 2.4E-02 | 0 |
| Internal Derangement of Knee                                                      | 1   | 1884003 | 1884003 | 1884003 | 2.28 | 2.3E-02 | 0 |
| Menstruation Functions                                                            | 545 | 770950  | 1157570 | 269260  | 2.29 | 2.2E-02 | 0 |
| Structures related to movement, unspecified                                       | 933 | 746725  | 1142685 | 178645  | 2.29 | 2.2E-02 | 0 |
| Sleep Functions                                                                   | 699 | 768070  | 1191784 | 126304  | 2.50 | 1.2E-02 | 0 |
| Sleep Disorders                                                                   | 74  | 970969  | 1183357 | 116859  | 2.64 | 8.2E-03 | 0 |
| Hyperhidrosis, unspecified                                                        | 2   | 1686329 | 1737813 | 1634844 | 2.68 | 7.4E-03 | 0 |
| Functions of Hair                                                                 | 718 | 774485  | 1109228 | 299151  | 2.70 | 6.9E-03 | 0 |



|                                                                                  |      |        |         |        |       |         |   |
|----------------------------------------------------------------------------------|------|--------|---------|--------|-------|---------|---|
| Water, Mineral and Electrolyte Balance Functions                                 | 1438 | 750085 | 1124753 | 260158 | 2.96  | 3.1E-03 | 0 |
| Blood Pressure Functions                                                         | 766  | 781438 | 1136306 | 176599 | 3.06  | 2.2E-03 | 0 |
| Products or Substances for Personal Consumption                                  | 599  | 803743 | 1150583 | 266960 | 3.25  | 1.1E-03 | 0 |
| Exercise Tolerance Functions                                                     | 1355 | 763848 | 1164004 | 205416 | 3.36  | 7.9E-04 | 0 |
| Potential Health Hazards Related to Socioeconomic and Psychosocial Circumstances | 142  | 953724 | 1197395 | 307947 | 3.46  | 5.5E-04 | 0 |
| Temperament and Personality Functions                                            | 1068 | 804389 | 1196450 | 134519 | 4.34  | 1.4E-05 | 1 |
| Immunological System Functions                                                   | 4197 | 747780 | 1134575 | 207559 | 5.01  | 5.5E-07 | 1 |
| Height                                                                           | 3284 | 766455 | 1142876 | 207088 | 5.48  | 4.3E-08 | 1 |
| Weight Maintenance Functions                                                     | 7813 | 802540 | 1184605 | 198782 | 12.80 | 1.6E-37 | 1 |

| Trait                                                                                   | N SNPs | Median age | Age 75% upper bound | Age 25% lower bound | Z-score | P value | Bonferroni |
|-----------------------------------------------------------------------------------------|--------|------------|---------------------|---------------------|---------|---------|------------|
| Vertical cup-disc ratio                                                                 | 515    | 23661      | 80315               | 17915               | -14.73  | 3.9E-49 | 1          |
| Depression - Lifetime number of depressed periods                                       | 395    | 21076      | 43485               | 13709               | -12.96  | 2.1E-38 | 1          |
| Lifetime number of sexual partners                                                      | 337    | 32349      | 164566              | 15909               | -11.98  | 4.4E-33 | 1          |
| Average weekly intake of other alcoholic drinks                                         | 281    | 20258      | 42061               | 14154               | -11.07  | 1.7E-28 | 1          |
| Number of depression episodes                                                           | 270    | 30529      | 194139              | 16894               | -10.66  | 1.5E-26 | 1          |
| Childhood sunburn occasions                                                             | 271    | 51971      | 322210              | 18685               | -10.22  | 1.6E-24 | 1          |
| Distance between home and job workplace                                                 | 249    | 83490      | 427368              | 22529               | -9.45   | 3.5E-21 | 1          |
| Frequency of solarium/sunlamp use                                                       | 184    | 80130      | 334445              | 29208               | -8.10   | 5.4E-16 | 1          |
| Salad / raw vegetable intake                                                            | 162    | 194781     | 777221              | 51721               | -6.22   | 5.0E-10 | 1          |
| Intraocular pressure                                                                    | 83     | 25426      | 312584              | 16388               | -5.92   | 3.3E-09 | 1          |
| Average weekly fortified wine intake                                                    | 132    | 201850     | 506902              | 73456               | -5.57   | 2.5E-08 | 1          |
| Cup area                                                                                | 57     | 52302      | 742885              | 20433               | -4.75   | 2.1E-06 | 1          |
| Frequency of travelling from home to job workplace                                      | 71     | 134420     | 503480              | 33335               | -4.62   | 3.8E-06 | 1          |
| Processed meat intake                                                                   | 76     | 160045     | 758022              | 54394               | -4.54   | 5.7E-06 | 1          |
| Average weekly spirits intake                                                           | 56     | 95610      | 352450              | 35048               | -4.42   | 9.7E-06 | 1          |
| Prospective memory test - Number of attempts                                            | 68     | 190118     | 553660              | 45600               | -4.08   | 4.5E-05 | 0          |
| Pork intake                                                                             | 56     | 134221     | 580550              | 43214               | -4.08   | 4.6E-05 | 0          |
| Number in household                                                                     | 52     | 168502     | 536184              | 60810               | -3.66   | 2.5E-04 | 0          |
| Ease of skin tanning                                                                    | 445    | 503970     | 1007923             | 66422               | -3.64   | 2.8E-04 | 0          |
| Number of children fathered (male)                                                      | 41     | 124491     | 467298              | 61860               | -3.51   | 4.4E-04 | 0          |
| Frequency of needing morning drink of alcohol after heavy drinking session in last year | 33     | 60270      | 333940              | 28723               | -3.51   | 4.5E-04 | 0          |
| Dried fruit intake                                                                      | 49     | 178220     | 554673              | 51945               | -3.50   | 4.6E-04 | 0          |
| Exposure to tobacco smoke outside home                                                  | 58     | 251797     | 480483              | 65161               | -3.25   | 1.1E-03 | 0          |
| Number of unsuccessful stop-smoking attempts                                            | 22     | 51853      | 399298              | 25193               | -3.05   | 2.3E-03 | 0          |
| Time spent using computer                                                               | 30     | 162893     | 532663              | 65235               | -2.92   | 3.5E-03 | 0          |
| Hair colour (natural, before greying): Dark brown                                       | 224    | 481623     | 953399              | 77350               | -2.90   | 3.7E-03 | 0          |
| Cooked vegetable intake                                                                 | 40     | 229193     | 545094              | 92228               | -2.81   | 5.0E-03 | 0          |
| Number of full brothers                                                                 | 33     | 191690     | 968785              | 38344               | -2.76   | 5.8E-03 | 0          |
| Average total household income before tax                                               | 47     | 284860     | 1091773             | 57845               | -2.71   | 6.7E-03 | 0          |
| Use of sun/uv protection                                                                | 28     | 185084     | 995476              | 56749               | -2.64   | 8.3E-03 | 0          |
| Breast cancer (GEE, adjusted for age)                                                   | 178    | 482129     | 987751              | 102244              | -2.62   | 8.8E-03 | 0          |
| Exposure to tobacco smoke at home                                                       | 45     | 292468     | 551775              | 78580               | -2.58   | 9.9E-03 | 0          |
| Breast cancer (GEE, adjusted for age and BMI)                                           | 186    | 486744     | 941669              | 101316              | -2.58   | 1.0E-02 | 0          |
| Disc area                                                                               | 45     | 303970     | 1027155             | 28035               | -2.50   | 1.3E-02 | 0          |
| Carpal tunnel syndrome                                                                  | 12     | 89668      | 637349              | 43850               | -2.23   | 2.6E-02 | 0          |
| Fluid intelligence test - Fluid intelligence score                                      | 13     | 82009      | 877208              | 57133               | -2.20   | 2.8E-02 | 0          |
| Glycine level (male)                                                                    | 12     | 102899     | 563625              | 27396               | -2.16   | 3.1E-02 | 0          |
| Fresh fruit intake                                                                      | 59     | 396183     | 974729              | 71794               | -2.14   | 3.2E-02 | 0          |
| Longest period of depression                                                            | 9      | 27979      | 79346               | 14239               | -2.09   | 3.6E-02 | 0          |
| Neutrophil percentage of white cells (three-way meta)                                   | 95     | 460268     | 1110643             | 77813               | -2.06   | 3.9E-02 | 0          |
| Legs-leg fat ratio (female)                                                             | 147    | 506280     | 1151456             | 67821               | -2.02   | 4.3E-02 | 0          |
| Left hippocampus                                                                        | 8      | 76249      | 633694              | 42060               | -2.00   | 4.6E-02 | 0          |

|                                                                                     |     |        |         |        |       |         |   |
|-------------------------------------------------------------------------------------|-----|--------|---------|--------|-------|---------|---|
| Pulse pressure                                                                      | 26  | 290495 | 916129  | 71718  | -1.98 | 4.7E-02 | 0 |
| Number of full sisters                                                              | 37  | 348723 | 761838  | 20181  | -1.97 | 4.9E-02 | 0 |
| Prospective memory test - Duration screen displayed                                 | 8   | 86876  | 150747  | 47791  | -1.95 | 5.1E-02 | 0 |
| Cereal type: Muesli                                                                 | 9   | 73237  | 222987  | 41485  | -1.93 | 5.4E-02 | 0 |
| Hair colour (natural, before greying): Light brown                                  | 77  | 457560 | 761985  | 73528  | -1.92 | 5.5E-02 | 0 |
| Other sociodemographic factors - Private healthcare                                 | 4   | 17123  | 29635   | 10233  | -1.90 | 5.7E-02 | 0 |
| Self-rated health                                                                   | 6   | 71608  | 174189  | 56422  | -1.86 | 6.3E-02 | 0 |
| Intracranial Volume                                                                 | 6   | 86245  | 470171  | 44418  | -1.84 | 6.5E-02 | 0 |
| Insomnia (male)                                                                     | 4   | 33202  | 35982   | 30368  | -1.83 | 6.7E-02 | 0 |
| Sleep efficiency                                                                    | 4   | 34179  | 44624   | 29291  | -1.83 | 6.7E-02 | 0 |
| L5 timing                                                                           | 4   | 46067  | 359654  | 40801  | -1.83 | 6.8E-02 | 0 |
| Cholesterol esters in large VLDL                                                    | 11  | 154010 | 792240  | 67378  | -1.82 | 6.9E-02 | 0 |
| Trail making test - Duration to complete numeric path (trail #1)                    | 4   | 54729  | 368738  | 28919  | -1.80 | 7.2E-02 | 0 |
| Number of stillbirths (female)                                                      | 2   | 21325  | 24569   | 18081  | -1.79 | 7.3E-02 | 0 |
| Ever taken oral contraceptive pill (female)                                         | 2   | 15392  | 16507   | 14276  | -1.79 | 7.4E-02 | 0 |
| Diagnoses - main ICD10: D12 Benign neoplasm of colon, rectum, anus and anal canal   | 13  | 196128 | 895060  | 112635 | -1.78 | 7.4E-02 | 0 |
| Illnesses of father: Lung cancer                                                    | 4   | 51982  | 283413  | 43957  | -1.78 | 7.5E-02 | 0 |
| Brain stem                                                                          | 16  | 249259 | 719940  | 68144  | -1.75 | 7.9E-02 | 0 |
| High-density lipoprotein 2 cholesterol (at exam 5, GEE, adjusted for multivariable) | 7   | 83680  | 606239  | 72304  | -1.75 | 8.0E-02 | 0 |
| mDC:%32+                                                                            | 271 | 566700 | 1021561 | 156415 | -1.75 | 8.0E-02 | 0 |
| Average weekly beer plus cider intake                                               | 19  | 270300 | 910450  | 46256  | -1.75 | 8.0E-02 | 0 |
| Acceleration average                                                                | 8   | 147557 | 1199616 | 22268  | -1.75 | 8.1E-02 | 0 |
| von Willebrand Factor (at exam 5, GEE, adjusted for multivariable)                  | 4   | 67704  | 275860  | 52308  | -1.74 | 8.2E-02 | 0 |
| QT interval (cohort exam 11 offspring exam 1, GEE, adjusted for age nad RR)         | 2   | 34503  | 43208   | 25797  | -1.73 | 8.3E-02 | 0 |
| Traumatic events - Someone to take to doctor when needed as a child                 | 2   | 35129  | 45148   | 25110  | -1.73 | 8.3E-02 | 0 |
| Low-density lipoprotein cholesterol (at exam 5, GEE, adjusted for age and sex)      | 2   | 37573  | 38652   | 36493  | -1.72 | 8.5E-02 | 0 |
| Handedness (chirality/laterality)                                                   | 2   | 40610  | 48418   | 32802  | -1.72 | 8.6E-02 | 0 |
| HP - Haptoglobin                                                                    | 2   | 44588  | 56868   | 32309  | -1.72 | 8.6E-02 | 0 |
| Reported occurrences of cancer                                                      | 2   | 37570  | 37957   | 37182  | -1.71 | 8.6E-02 | 0 |
| Doctor diagnosed asthma                                                             | 14  | 244103 | 755139  | 51321  | -1.70 | 8.9E-02 | 0 |
| Morbidity-free survival (at age 65, GEE, adjusted for birth-cohort)                 | 37  | 394573 | 904338  | 106636 | -1.70 | 9.0E-02 | 0 |
| Left thalamus proper                                                                | 2   | 49585  | 51112   | 48058  | -1.70 | 9.0E-02 | 0 |
| Spine Neck BMD (GEE, male, adjusted for multivariable)                              | 2   | 41796  | 44704   | 38889  | -1.70 | 9.0E-02 | 0 |
| BRCA1/2-negative breast cancer                                                      | 2   | 50715  | 51587   | 49842  | -1.68 | 9.2E-02 | 0 |
| Hip circumference (female)                                                          | 33  | 382215 | 1035158 | 79540  | -1.67 | 9.5E-02 | 0 |
| SDNN HRV (cohort exam 18 offspring exam 3, GEE, adjusted for age and HR)            | 2   | 55596  | 69385   | 41806  | -1.66 | 9.6E-02 | 0 |
| Ever depressed for a whole week                                                     | 5   | 56776  | 401733  | 42107  | -1.65 | 9.9E-02 | 0 |
| Schizophrenia/Bipolar disorder                                                      | 86  | 499765 | 1068881 | 81502  | -1.65 | 1.0E-01 | 0 |
| Usual weekday sleep duration (GEE, adjusted for age, sex and BMI)                   | 2   | 69364  | 69517   | 69212  | -1.64 | 1.0E-01 | 0 |
| Left precentral                                                                     | 5   | 63278  | 867898  | 62100  | -1.64 | 1.0E-01 | 0 |
| Interpolated Age of participant when non-cancer illness first diagnosed             | 6   | 144197 | 630851  | 89913  | -1.63 | 1.0E-01 | 0 |
| Interpolated Year when non-cancer illness first diagnosed                           | 6   | 144197 | 630851  | 89913  | -1.63 | 1.0E-01 | 0 |
| :::X-11491                                                                          | 2   | 74898  | 87034   | 62762  | -1.61 | 1.1E-01 | 0 |

|                                                                                               |     |        |         |        |       |         |   |
|-----------------------------------------------------------------------------------------------|-----|--------|---------|--------|-------|---------|---|
| Anterior limb of internal capsule mode of anisotropy                                          | 4   | 113774 | 254376  | 55525  | -1.61 | 1.1E-01 | 0 |
| Suffer from 'nerves' (SUF-NERV)                                                               | 5   | 79348  | 586548  | 63709  | -1.61 | 1.1E-01 | 0 |
| Non-oily fish intake                                                                          | 10  | 216765 | 424298  | 83193  | -1.61 | 1.1E-01 | 0 |
| Body Mass Index - Child                                                                       | 17  | 292630 | 513870  | 76367  | -1.60 | 1.1E-01 | 0 |
| Mean Hippocampus                                                                              | 2   | 81421  | 105141  | 57701  | -1.59 | 1.1E-01 | 0 |
| Peptide::gamma-glutamyl::gamma-glutamyltyrosine                                               | 4   | 118692 | 357965  | 97545  | -1.59 | 1.1E-01 | 0 |
| Left lateral ventricle                                                                        | 9   | 182377 | 474765  | 97114  | -1.58 | 1.2E-01 | 0 |
| Milk type used: Soya                                                                          | 5   | 85606  | 1419258 | 53268  | -1.57 | 1.2E-01 | 0 |
| Cancer register - Type of cancer: ICD10: C44 Other and unspecified malignant neoplasm of skin | 28  | 376049 | 766590  | 99630  | -1.57 | 1.2E-01 | 0 |
| Amino acid::Valine, leucine and isoleucine metabolism::isovalerylcarnitine                    | 2   | 89642  | 110107  | 69178  | -1.56 | 1.2E-01 | 0 |
| Beef intake                                                                                   | 6   | 176647 | 724122  | 78859  | -1.56 | 1.2E-01 | 0 |
| Insulin sensitivity (GEE, adjusted for age and sex)                                           | 5   | 80097  | 92573   | 72101  | -1.56 | 1.2E-01 | 0 |
| Triglycerides (at exam 5, GEE, adjusted for age and sex)                                      | 2   | 102186 | 125350  | 79021  | -1.55 | 1.2E-01 | 0 |
| Electronic device use - Plays computer games                                                  | 27  | 378423 | 1017605 | 84049  | -1.54 | 1.2E-01 | 0 |
| Number of vehicles in household                                                               | 5   | 100707 | 138743  | 58540  | -1.53 | 1.3E-01 | 0 |
| Sagittal stratum mean diuivities                                                              | 3   | 23901  | 359703  | 23073  | -1.53 | 1.3E-01 | 0 |
| Thinness                                                                                      | 3   | 33968  | 518521  | 23297  | -1.52 | 1.3E-01 | 0 |
| Sagittal stratum radial diuivities                                                            | 3   | 23901  | 474499  | 23073  | -1.52 | 1.3E-01 | 0 |
| Interferon gamma-induced protein 10 (CXCL10)                                                  | 3   | 28732  | 811925  | 26743  | -1.52 | 1.3E-01 | 0 |
| TNF-related apoptosis inducing ligand                                                         | 3   | 24513  | 36174   | 22204  | -1.51 | 1.3E-01 | 0 |
| Interleukin 6 (at exam 7, GEE, adjusted for age and sex)                                      | 2   | 114955 | 144786  | 85124  | -1.51 | 1.3E-01 | 0 |
| Pain type(s) experienced in last month: Neck or shoulder pain                                 | 5   | 108061 | 787273  | 30242  | -1.50 | 1.3E-01 | 0 |
| Mouth/teeth dental problems: Loose teeth                                                      | 5   | 113557 | 782813  | 58698  | -1.50 | 1.3E-01 | 0 |
| MST1 - Hepatocyte growth factor-like protein                                                  | 3   | 44586  | 123463  | 38980  | -1.50 | 1.3E-01 | 0 |
| Ulcerative colitis                                                                            | 294 | 587378 | 918819  | 199182 | -1.49 | 1.4E-01 | 0 |
| Cannabis use - Ever taken cannabis                                                            | 9   | 204782 | 1218098 | 50761  | -1.49 | 1.4E-01 | 0 |
| HOMA-IR (at exam 5, GEE, adjusted for age and sex)                                            | 3   | 42572  | 198497  | 42306  | -1.49 | 1.4E-01 | 0 |
| Morbidity-free survival (at age 65, GEE, adjusted for multivariable)                          | 37  | 430495 | 904338  | 166969 | -1.48 | 1.4E-01 | 0 |
| Depression - Recent thoughts of suicide or self-harm                                          | 4   | 156480 | 234614  | 123060 | -1.48 | 1.4E-01 | 0 |
| Right vessel                                                                                  | 2   | 133376 | 148423  | 118329 | -1.48 | 1.4E-01 | 0 |
| Usual side of head for mobile phone use                                                       | 2   | 129096 | 151873  | 106319 | -1.47 | 1.4E-01 | 0 |
| Lipid::Lysolipid::1-eicosatrienoylglycerophosphocholine*                                      | 2   | 124936 | 151070  | 98801  | -1.47 | 1.4E-01 | 0 |
| Left precuneus                                                                                | 3   | 46213  | 294738  | 46117  | -1.46 | 1.4E-01 | 0 |
| Length of time at current address                                                             | 5   | 123446 | 1197513 | 64740  | -1.46 | 1.4E-01 | 0 |
| Fluid intelligence score                                                                      | 47  | 459465 | 1121114 | 81313  | -1.46 | 1.5E-01 | 0 |
| Plasma Apolipoprotein E level (at exam 5, GEE, adjusted for multivariable)                    | 3   | 51715  | 304511  | 39040  | -1.46 | 1.5E-01 | 0 |
| Total body BMD (30-45 years old)                                                              | 7   | 176519 | 813318  | 71063  | -1.46 | 1.5E-01 | 0 |
| Left lateral occipital                                                                        | 3   | 57675  | 162368  | 46604  | -1.46 | 1.5E-01 | 0 |
| Neck Section Modulus (GEE, male, adjusted for multivariable)                                  | 3   | 60104  | 98041   | 53237  | -1.45 | 1.5E-01 | 0 |
| Smoking cessation                                                                             | 5   | 125509 | 875095  | 89821  | -1.45 | 1.5E-01 | 0 |
| TNC - Tenascin                                                                                | 2   | 141702 | 145360  | 138044 | -1.45 | 1.5E-01 | 0 |
| Hands-free device/speakerphone use with mobile phone in last 3 month                          | 3   | 58721  | 336492  | 55004  | -1.45 | 1.5E-01 | 0 |
| High-density lipoprotein 2 cholesterol (at exam 4, GEE, adjusted for multivariable)           | 7   | 179200 | 718004  | 109570 | -1.45 | 1.5E-01 | 0 |

|                                                                                                    |    |        |         |        |       |         |   |
|----------------------------------------------------------------------------------------------------|----|--------|---------|--------|-------|---------|---|
| Cytomegalovirus IgG levels                                                                         | 2  | 143819 | 203686  | 83952  | -1.44 | 1.5E-01 | 0 |
| Average across all tracts fractional anisotropy                                                    | 3  | 61894  | 460397  | 46179  | -1.44 | 1.5E-01 | 0 |
| Anterior limb of internal capsule fractional anisotropy                                            | 2  | 143717 | 197707  | 89727  | -1.44 | 1.5E-01 | 0 |
| Depression - Recent feelings of tiredness or low energy                                            | 3  | 66860  | 774248  | 55193  | -1.42 | 1.6E-01 | 0 |
| Major dietary changes in the last 5 years                                                          | 9  | 229329 | 889053  | 69644  | -1.42 | 1.6E-01 | 0 |
| Left cuneus                                                                                        | 3  | 74601  | 624878  | 66138  | -1.41 | 1.6E-01 | 0 |
| Nucleotide::Pyrimidine metabolism, uracil containing::uridine                                      | 3  | 71641  | 618145  | 70840  | -1.41 | 1.6E-01 | 0 |
| Frequency of drinking alcohol                                                                      | 6  | 221736 | 436783  | 67929  | -1.40 | 1.6E-01 | 0 |
| Mean Putamen                                                                                       | 3  | 75055  | 662063  | 63835  | -1.40 | 1.6E-01 | 0 |
| Plasma Apolipoprotein A-I level (GEE, multivariate adjusted)                                       | 2  | 164747 | 227617  | 101877 | -1.40 | 1.6E-01 | 0 |
| Plasma Apolipoprotein A-I level (GEE, adjusted for age and sex)                                    | 2  | 166038 | 228263  | 103813 | -1.40 | 1.6E-01 | 0 |
| Thyroid stimulation hormone (at exam 4, GEE, adjusted for age and sex)                             | 2  | 173253 | 208335  | 138172 | -1.38 | 1.7E-01 | 0 |
| Intermediate-density lipoprotein by NMR (at exam 4, GEE, adjusted for age and sex)                 | 11 | 266905 | 946700  | 66152  | -1.38 | 1.7E-01 | 0 |
| Reason for reducing amount of alcohol drunk: Health precaution                                     | 2  | 179762 | 243505  | 116020 | -1.37 | 1.7E-01 | 0 |
| Amyotrophic lateral sclerosis (meta-analysis)                                                      | 3  | 87092  | 675340  | 51090  | -1.36 | 1.7E-01 | 0 |
| Mean FEV1 from exam 3 and 5 (GEE, adjusted for multiple covariates)                                | 3  | 80044  | 242560  | 75360  | -1.36 | 1.7E-01 | 0 |
| College completion                                                                                 | 3  | 95032  | 422132  | 83753  | -1.35 | 1.8E-01 | 0 |
| Legs-leg fat ratio (male)                                                                          | 20 | 385794 | 1069323 | 78229  | -1.34 | 1.8E-01 | 0 |
| Pairs matching test - Number of incorrect matches in round                                         | 6  | 239202 | 269988  | 95049  | -1.34 | 1.8E-01 | 0 |
| Traumatic events - Avoided activities or situations because of previous stressful experience in pa | 3  | 100716 | 240462  | 78602  | -1.33 | 1.8E-01 | 0 |
| Viscosity I (at exam 5, GEE, adjusted for multivariable)                                           | 4  | 207244 | 576054  | 67891  | -1.33 | 1.8E-01 | 0 |
| Corticospinal tract fractional anisotropy                                                          | 2  | 186521 | 272234  | 100808 | -1.32 | 1.9E-01 | 0 |
| Platelet aggregation to Epinephrine (at exam 5, GEE, adjusted for multivariable)                   | 2  | 181712 | 252351  | 111073 | -1.32 | 1.9E-01 | 0 |
| Large high-density lipoprotein by NMR (at exam 4, GEE, adjusted for multivariable)                 | 4  | 210962 | 496726  | 102327 | -1.32 | 1.9E-01 | 0 |
| Lipid::Carnitine metabolism::X-13431--nonanoylcarnitine*                                           | 2  | 178248 | 238599  | 117897 | -1.32 | 1.9E-01 | 0 |
| Sphingomyelins                                                                                     | 7  | 225348 | 1028358 | 41734  | -1.31 | 1.9E-01 | 0 |
| Amino acid::Valine, leucine and isoleucine metabolism::alpha-hydroxyisovalerate                    | 2  | 199588 | 257028  | 142149 | -1.31 | 1.9E-01 | 0 |
| Dehydroepiandrosterone sulfate (at exam 3, GEE, adjusted for age and sex)                          | 2  | 187750 | 258885  | 116615 | -1.31 | 1.9E-01 | 0 |
| Fornix (column and body of fornix) fractional anisotropy                                           | 6  | 247492 | 1190918 | 106453 | -1.30 | 1.9E-01 | 0 |
| Trochanter BMD (GEE, adjusted for multivariable)                                                   | 2  | 196602 | 268736  | 124468 | -1.30 | 1.9E-01 | 0 |
| Posterior limb of internal capsule mode of anisotropy                                              | 6  | 248493 | 506239  | 154241 | -1.29 | 2.0E-01 | 0 |
| Interferon-gamma                                                                                   | 1  | 13015  | 13015   | 13015  | -1.29 | 2.0E-01 | 0 |
| Plasma Apolipoprotein E level (at exam 5, GEE, adjusted for age and sex)                           | 4  | 230313 | 446009  | 45378  | -1.29 | 2.0E-01 | 0 |
| Brain natriuretic peptide (at exam 6, GEE, adjusted for multivariable)                             | 1  | 9422   | 9422    | 9422   | -1.28 | 2.0E-01 | 0 |
| Chronic kidney disease                                                                             | 56 | 505864 | 1150924 | 78809  | -1.28 | 2.0E-01 | 0 |
| Tumor necrosis factor beta                                                                         | 1  | 5901   | 5901    | 5901   | -1.27 | 2.0E-01 | 0 |
| Posterior corona radiata axial diuivities                                                          | 2  | 208609 | 296688  | 120530 | -1.27 | 2.0E-01 | 0 |
| Phosphorylated Tau at position 181                                                                 | 1  | 20758  | 20758   | 20758  | -1.27 | 2.0E-01 | 0 |
| Leucine                                                                                            | 4  | 226721 | 696908  | 55258  | -1.27 | 2.0E-01 | 0 |
| Health satisfaction                                                                                | 1  | 18576  | 18576   | 18576  | -1.27 | 2.0E-01 | 0 |
| Superior longitudinal fasciculus axial diuivities                                                  | 4  | 227778 | 738823  | 63880  | -1.27 | 2.0E-01 | 0 |
| Extreme chronotype                                                                                 | 3  | 130692 | 203013  | 84443  | -1.27 | 2.0E-01 | 0 |
| Maximum carotid artery bulb IMT (at exam 6, GEE, adjusted for multivariable)                       | 1  | 12886  | 12886   | 12886  | -1.27 | 2.0E-01 | 0 |

|                                                                                         |   |        |        |        |       |         |   |
|-----------------------------------------------------------------------------------------|---|--------|--------|--------|-------|---------|---|
| UCHL1 - Ubiquitin carboxyl-terminal hydrolase isozyme L1                                | 1 | 14724  | 14724  | 14724  | -1.27 | 2.0E-01 | 0 |
| ...X-12092                                                                              | 3 | 124129 | 477847 | 98449  | -1.27 | 2.0E-01 | 0 |
| Double eyelid                                                                           | 2 | 219257 | 228872 | 209641 | -1.27 | 2.1E-01 | 0 |
| Bilirubin (at exam 2, GEE, adjusted for multivariable)                                  | 2 | 216216 | 306358 | 126074 | -1.27 | 2.1E-01 | 0 |
| Right posterior cingulate                                                               | 1 | 21558  | 21558  | 21558  | -1.26 | 2.1E-01 | 0 |
| Amino acid::Urea cycle; arginine-, proline-, metabolism::citrulline                     | 3 | 135205 | 540796 | 96099  | -1.26 | 2.1E-01 | 0 |
| Parietal brain volume (GEE, adjusted for age and sex)                                   | 1 | 24553  | 24553  | 24553  | -1.26 | 2.1E-01 | 0 |
| Peak insulin response (adjusted for BMI)                                                | 3 | 134748 | 419900 | 78553  | -1.26 | 2.1E-01 | 0 |
| Medial collateral ligament injury                                                       | 1 | 26829  | 26829  | 26829  | -1.26 | 2.1E-01 | 0 |
| Survival past average life expectancy (GEE, adjusted for multivariable)                 | 1 | 29042  | 29042  | 29042  | -1.26 | 2.1E-01 | 0 |
| Peptide::Polypeptide::HWESASXX*                                                         | 1 | 26849  | 26849  | 26849  | -1.25 | 2.1E-01 | 0 |
| Duration of heavy DIY                                                                   | 1 | 22587  | 22587  | 22587  | -1.25 | 2.1E-01 | 0 |
| Coffee type: Decaffeinated coffee (any type)                                            | 1 | 32190  | 32190  | 32190  | -1.25 | 2.1E-01 | 0 |
| FRZB - Secreted frizzled-related protein 3                                              | 1 | 36235  | 36235  | 36235  | -1.25 | 2.1E-01 | 0 |
| THBS1 - Thrombospondin-1                                                                | 1 | 25776  | 25776  | 25776  | -1.25 | 2.1E-01 | 0 |
| Shaft Width (GEE, adjusted for multivariable)                                           | 1 | 26182  | 26182  | 26182  | -1.25 | 2.1E-01 | 0 |
| Xenobiotics::Drug::p-acetamidophenylglucuronide                                         | 1 | 28473  | 28473  | 28473  | -1.25 | 2.1E-01 | 0 |
| Age started oral contraceptive pill (female)                                            | 4 | 240136 | 512628 | 42467  | -1.25 | 2.1E-01 | 0 |
| LMNB1 - Lamin-B1                                                                        | 1 | 24460  | 24460  | 24460  | -1.25 | 2.1E-01 | 0 |
| Traumatic events - Felt distant from other people in past month                         | 1 | 26219  | 26219  | 26219  | -1.25 | 2.1E-01 | 0 |
| Parietal brain volume (GEE, adjusted for multivariable)                                 | 1 | 24553  | 24553  | 24553  | -1.25 | 2.1E-01 | 0 |
| Immunosuppressants                                                                      | 1 | 24454  | 24454  | 24454  | -1.25 | 2.1E-01 | 0 |
| Hepatocyte growth factor                                                                | 1 | 31244  | 31244  | 31244  | -1.24 | 2.1E-01 | 0 |
| Father's age at death                                                                   | 4 | 234241 | 601883 | 45062  | -1.24 | 2.1E-01 | 0 |
| Rotator cuff injury                                                                     | 1 | 34759  | 34759  | 34759  | -1.24 | 2.1E-01 | 0 |
| Anti-Mullerian hormone                                                                  | 1 | 26754  | 26754  | 26754  | -1.24 | 2.1E-01 | 0 |
| Eyebrows                                                                                | 1 | 36447  | 36447  | 36447  | -1.24 | 2.1E-01 | 0 |
| Diagnoses - secondary ICD10: Z96 Presence of other functional implants                  | 1 | 23028  | 23028  | 23028  | -1.24 | 2.1E-01 | 0 |
| CCL25 - C-C motif chemokine 25                                                          | 1 | 27893  | 27893  | 27893  | -1.24 | 2.2E-01 | 0 |
| MPO - Myeloperoxidase                                                                   | 1 | 31385  | 31385  | 31385  | -1.24 | 2.2E-01 | 0 |
| Alcohol - Alcohol drinker status: Previous vs Current                                   | 1 | 25520  | 25520  | 25520  | -1.24 | 2.2E-01 | 0 |
| Shaft Section Modulus (GEE, adjusted for multivariable)                                 | 1 | 23513  | 23513  | 23513  | -1.24 | 2.2E-01 | 0 |
| Frequency of failure to fulfil normal expectations due to drinking alcohol in last year | 1 | 29260  | 29260  | 29260  | -1.24 | 2.2E-01 | 0 |
| Ankle-brachial index (at exam 7, GEE, adjusted for multivariable)                       | 1 | 29042  | 29042  | 29042  | -1.24 | 2.2E-01 | 0 |
| Tinnitus                                                                                | 1 | 27175  | 27175  | 27175  | -1.24 | 2.2E-01 | 0 |
| Frequency of heavy DIY in last 4 weeks                                                  | 1 | 35995  | 35995  | 35995  | -1.24 | 2.2E-01 | 0 |
| Left handed                                                                             | 1 | 40135  | 40135  | 40135  | -1.23 | 2.2E-01 | 0 |
| FUT5 - Alpha-(1,3)-fucosyltransferase 5                                                 | 1 | 19351  | 19351  | 19351  | -1.23 | 2.2E-01 | 0 |
| Regulated on Activation, Normal T Cell Expressed and Secreted (CCL5)                    | 1 | 27087  | 27087  | 27087  | -1.23 | 2.2E-01 | 0 |
| Alcohol dependency (unrelated genotyped individuals)                                    | 1 | 33942  | 33942  | 33942  | -1.23 | 2.2E-01 | 0 |
| Remnant lipoprotein cholesterol (at exam 4, GEE, adjusted for age and sex)              | 1 | 48458  | 48458  | 48458  | -1.23 | 2.2E-01 | 0 |
| Depression - Did your sleep change?                                                     | 1 | 26515  | 26515  | 26515  | -1.23 | 2.2E-01 | 0 |
| Left fusiform                                                                           | 4 | 234976 | 643218 | 18827  | -1.23 | 2.2E-01 | 0 |

|                                                                                                      |    |        |        |        |       |         |   |
|------------------------------------------------------------------------------------------------------|----|--------|--------|--------|-------|---------|---|
| Type 2 Diabetes (Dominance deviation model)                                                          | 1  | 24626  | 24626  | 24626  | -1.23 | 2.2E-01 | 0 |
| Coronary heart disease (MI, CI or CHD death, GEE, adjusted for age and sex)                          | 2  | 221913 | 299518 | 144308 | -1.23 | 2.2E-01 | 0 |
| CXCL6 - C-X-C motif chemokine 6                                                                      | 1  | 36394  | 36394  | 36394  | -1.23 | 2.2E-01 | 0 |
| Fornix (column and body of fornix) mean diuivities                                                   | 4  | 247492 | 714670 | 145666 | -1.23 | 2.2E-01 | 0 |
| Interleukin-2 receptor, alpha subunit                                                                | 1  | 23983  | 23983  | 23983  | -1.23 | 2.2E-01 | 0 |
| Neuroticism (IRT)                                                                                    | 1  | 30622  | 30621  | 30621  | -1.22 | 2.2E-01 | 0 |
| Maternal smoking around birth                                                                        | 14 | 364589 | 708594 | 50867  | -1.22 | 2.2E-01 | 0 |
| Fasting insulin interaction (adjusted for BMI)                                                       | 10 | 316486 | 995656 | 37916  | -1.22 | 2.2E-01 | 0 |
| NAAA - N-acylethanolamine-hydrolyzing acid amidase                                                   | 2  | 228643 | 320999 | 136287 | -1.22 | 2.2E-01 | 0 |
| Triglyceride / High-density lipoprotein cholesterol ratio (at exam 5, GEE, adjusted for age and sex) | 3  | 148515 | 440528 | 102186 | -1.22 | 2.2E-01 | 0 |
| Number of older siblings                                                                             | 1  | 48252  | 48252  | 48252  | -1.22 | 2.2E-01 | 0 |
| F5 - Coagulation Factor V                                                                            | 1  | 42326  | 42326  | 42326  | -1.22 | 2.2E-01 | 0 |
| Alcohol dependency (unrelated individuals)                                                           | 1  | 33942  | 33942  | 33942  | -1.22 | 2.2E-01 | 0 |
| Total cholesterol (at exam 5, GEE, adjusted for age and sex)                                         | 1  | 39731  | 39731  | 39731  | -1.22 | 2.2E-01 | 0 |
| Reason for glasses/contact lenses: For 'astigmatism'                                                 | 1  | 37587  | 37587  | 37587  | -1.22 | 2.2E-01 | 0 |
| Mean MMSE score for exam 5 and 7 (GEE, adjusted for age)                                             | 5  | 213150 | 393503 | 89686  | -1.22 | 2.2E-01 | 0 |
| ADAMTS5 - A disintegrin and metalloproteinase with thrombospondin motifs 5                           | 1  | 42435  | 42435  | 42435  | -1.22 | 2.2E-01 | 0 |
| TDGF1 - Teratocarcinoma-derived growth factor 1                                                      | 1  | 46758  | 46758  | 46758  | -1.22 | 2.2E-01 | 0 |
| Splenium of corpus callosum mode of anisotropy                                                       | 1  | 35532  | 35532  | 35532  | -1.22 | 2.2E-01 | 0 |
| C2 - Complement C2                                                                                   | 1  | 49177  | 49177  | 49177  | -1.22 | 2.2E-01 | 0 |
| Job involves shift work                                                                              | 3  | 150650 | 995752 | 108329 | -1.21 | 2.2E-01 | 0 |
| High-density lipoprotein 3 cholesterol (at exam 5, GEE, adjusted for age and sex)                    | 1  | 41063  | 41063  | 41063  | -1.21 | 2.2E-01 | 0 |
| Frequency of light DIY in last 4 weeks                                                               | 1  | 41613  | 41613  | 41613  | -1.21 | 2.2E-01 | 0 |
| Illnesses of mother: Chronic bronchitis/emphysema                                                    | 1  | 49775  | 49775  | 49775  | -1.21 | 2.3E-01 | 0 |
| Follicle stimulating hormone (at exam 3, GEE, adjusted for multivariable)                            | 6  | 274744 | 876374 | 106641 | -1.21 | 2.3E-01 | 0 |
| Ratio of visceral-tosubcutaneous adipose tissue volume (adjusted for BMI)                            | 1  | 43488  | 43488  | 43488  | -1.21 | 2.3E-01 | 0 |
| Boston Naming Test score without cues (GEE, adjusted for multivariable)                              | 4  | 250470 | 460136 | 206938 | -1.21 | 2.3E-01 | 0 |
| Illnesses of father: Stroke                                                                          | 1  | 40700  | 40700  | 40700  | -1.21 | 2.3E-01 | 0 |
| Duration walking for pleasure                                                                        | 1  | 48891  | 48891  | 48891  | -1.21 | 2.3E-01 | 0 |
| Fornix (column and body of fornix) axial diuivities                                                  | 4  | 247492 | 396774 | 145666 | -1.21 | 2.3E-01 | 0 |
| TXNDC12 - Thioredoxin domain-containing protein 12                                                   | 1  | 41374  | 41374  | 41374  | -1.21 | 2.3E-01 | 0 |
| CTSS - Cathepsin S                                                                                   | 1  | 47665  | 47665  | 47665  | -1.21 | 2.3E-01 | 0 |
| Meconium ileus in cystic fibrosis                                                                    | 1  | 40478  | 40478  | 40478  | -1.21 | 2.3E-01 | 0 |
| HOMA-IR (at exam 5, GEE, adjusted for age, sex and BMI)                                              | 2  | 232251 | 332114 | 132388 | -1.21 | 2.3E-01 | 0 |
| IL11RA - Interleukin-11 receptor subunit alpha                                                       | 1  | 47165  | 47165  | 47165  | -1.21 | 2.3E-01 | 0 |
| Diagnoses - main ICD10: K21 Gastro-esophageal reflux disease                                         | 1  | 43810  | 43810  | 43810  | -1.20 | 2.3E-01 | 0 |
| CA13 - Carbonic anhydrase 13                                                                         | 1  | 52683  | 52683  | 52683  | -1.20 | 2.3E-01 | 0 |
| Amino acid::Lysine metabolism::pipecolate                                                            | 1  | 41635  | 41635  | 41635  | -1.20 | 2.3E-01 | 0 |
| MMP7 - Matrilysin                                                                                    | 1  | 41413  | 41413  | 41413  | -1.20 | 2.3E-01 | 0 |
| :::X-11905                                                                                           | 1  | 50626  | 50626  | 50626  | -1.20 | 2.3E-01 | 0 |
| Bilirubin (at exam 2, GEE, adjusted for age and sex)                                                 | 1  | 35932  | 35932  | 35932  | -1.20 | 2.3E-01 | 0 |
| :::X-11529                                                                                           | 1  | 50626  | 50626  | 50626  | -1.20 | 2.3E-01 | 0 |
| High-density lipoprotein cholesterol (at exam 5, GEE, adjusted for age and sex)                      | 1  | 41063  | 41063  | 41063  | -1.20 | 2.3E-01 | 0 |

|                                                                                                           |     |        |         |        |       |         |   |
|-----------------------------------------------------------------------------------------------------------|-----|--------|---------|--------|-------|---------|---|
| Lipid::Fatty acid, dicarboxylate::octadecanedioate                                                        | 1   | 49898  | 49898   | 49898  | -1.20 | 2.3E-01 | 0 |
| TFPI - Tissue factor pathway inhibitor                                                                    | 1   | 49125  | 49125   | 49125  | -1.20 | 2.3E-01 | 0 |
| Traumatic events - Able to pay rent/morgage as an adult                                                   | 1   | 41906  | 41906   | 41906  | -1.20 | 2.3E-01 | 0 |
| Total cholesterol / High-density lipoprotein cholesterol ratio (at exam 4, GEE, adjusted for age and sex) | 1   | 50557  | 50557   | 50557  | -1.20 | 2.3E-01 | 0 |
| MAP2K4 - Dual specificity mitogen-activated protein kinase kinase 4                                       | 2   | 233334 | 266697  | 199971 | -1.20 | 2.3E-01 | 0 |
| Fasting HbA1c (at exam 7, GEE, adjusted for age, sex and BMI)                                             | 1   | 52810  | 52810   | 52810  | -1.19 | 2.3E-01 | 0 |
| BST1 - ADP-ribosyl cyclase/cyclic ADP-ribose hydrolase 2                                                  | 1   | 56841  | 56841   | 56841  | -1.19 | 2.3E-01 | 0 |
| Chest pain or discomfort walking normally                                                                 | 1   | 51049  | 51049   | 51049  | -1.19 | 2.3E-01 | 0 |
| MMP12 - Macrophage metalloelastase                                                                        | 1   | 53852  | 53852   | 53852  | -1.19 | 2.3E-01 | 0 |
| Lean body mass (appendicular)                                                                             | 1   | 50637  | 50637   | 50637  | -1.19 | 2.3E-01 | 0 |
| Smoking status: Previous vs Current                                                                       | 1   | 56814  | 56814   | 56814  | -1.19 | 2.3E-01 | 0 |
| Right medial orbitofrontal                                                                                | 1   | 55574  | 55574   | 55574  | -1.19 | 2.3E-01 | 0 |
| ANXA2 - Annexin A2                                                                                        | 1   | 56800  | 56800   | 56800  | -1.19 | 2.4E-01 | 0 |
| Fibrinogen                                                                                                | 1   | 57474  | 57474   | 57474  | -1.18 | 2.4E-01 | 0 |
| Mean Amygdala                                                                                             | 1   | 50604  | 50604   | 50604  | -1.18 | 2.4E-01 | 0 |
| Macrophage inflammatory protein-1 (CCL4)                                                                  | 2   | 249325 | 361553  | 137098 | -1.18 | 2.4E-01 | 0 |
| Granulocyte percentage of myeloid white cells (three-way meta)                                            | 118 | 566890 | 1062923 | 61371  | -1.18 | 2.4E-01 | 0 |
| Superior corona radiata axial diuivities                                                                  | 4   | 257590 | 583121  | 68972  | -1.18 | 2.4E-01 | 0 |
| Number of pregnancy terminations (female)                                                                 | 9   | 296375 | 968948  | 83377  | -1.18 | 2.4E-01 | 0 |
| ::::X-12749                                                                                               | 1   | 49556  | 49556   | 49556  | -1.18 | 2.4E-01 | 0 |
| Amino acid::Urea cycle; arginine-, proline-, metabolism::homocitrulline                                   | 1   | 72770  | 72770   | 72770  | -1.18 | 2.4E-01 | 0 |
| Own or rent accommodation lived in: Own outright (by you or someone in your household)                    | 1   | 55775  | 55775   | 55775  | -1.18 | 2.4E-01 | 0 |
| CD200R1 - Cell surface glycoprotein CD200 receptor 1                                                      | 1   | 62122  | 62122   | 62122  | -1.18 | 2.4E-01 | 0 |
| External capsule mode of anisotropy                                                                       | 1   | 54619  | 54618   | 54618  | -1.18 | 2.4E-01 | 0 |
| Cardiovascular disease (MI, CI, CHD death or ABI, GEE, adjusted for age and sex)                          | 1   | 66703  | 66703   | 66703  | -1.18 | 2.4E-01 | 0 |
| SERPING1 - Plasma protease C1 inhibitor                                                                   | 1   | 64831  | 64831   | 64831  | -1.18 | 2.4E-01 | 0 |
| Bipolar and major depression status                                                                       | 1   | 66277  | 66277   | 66277  | -1.18 | 2.4E-01 | 0 |
| Amino acid::Glutamate metabolism::glutamine                                                               | 1   | 66319  | 66319   | 66319  | -1.18 | 2.4E-01 | 0 |
| Subcutaneous adipose tissue volume (female)                                                               | 1   | 58604  | 58604   | 58604  | -1.17 | 2.4E-01 | 0 |
| Number of cigarettes smoked per day                                                                       | 1   | 53928  | 53928   | 53928  | -1.17 | 2.4E-01 | 0 |
| ::::X-13658                                                                                               | 1   | 56255  | 56254   | 56254  | -1.17 | 2.4E-01 | 0 |
| CTSB - Cathepsin B                                                                                        | 1   | 64966  | 64966   | 64966  | -1.17 | 2.4E-01 | 0 |
| IL23R - Interleukin-23 receptor                                                                           | 1   | 71257  | 71257   | 71257  | -1.17 | 2.4E-01 | 0 |
| ::::X-11858                                                                                               | 1   | 53958  | 53958   | 53958  | -1.17 | 2.4E-01 | 0 |
| Cardiovascular disease (MI, CI, CHD death or ABI, GEE, adjusted for multivariable)                        | 1   | 66703  | 66703   | 66703  | -1.17 | 2.4E-01 | 0 |
| CFB - Complement factor B                                                                                 | 1   | 62138  | 62138   | 62138  | -1.17 | 2.4E-01 | 0 |
| Years since last breast cancer screening / mammogram (female)                                             | 1   | 74025  | 74025   | 74025  | -1.17 | 2.4E-01 | 0 |
| IGF1 - Insulin-like growth factor I                                                                       | 1   | 73830  | 73830   | 73830  | -1.17 | 2.4E-01 | 0 |
| Oily fish intake                                                                                          | 52  | 517029 | 1102269 | 70475  | -1.17 | 2.4E-01 | 0 |
| Frequency of depressed mood in last 2 weeks                                                               | 8   | 311489 | 801214  | 59210  | -1.17 | 2.4E-01 | 0 |
| Phltriium width                                                                                           | 1   | 69269  | 69269   | 69269  | -1.17 | 2.4E-01 | 0 |
| Total cholesterol (at exam 3, GEE, adjusted for age and sex)                                              | 1   | 77581  | 77581   | 77581  | -1.17 | 2.4E-01 | 0 |
| C4A C4B - Complement C4b                                                                                  | 1   | 62587  | 62587   | 62587  | -1.17 | 2.4E-01 | 0 |



|                                                                                                      |     |        |         |        |       |         |   |
|------------------------------------------------------------------------------------------------------|-----|--------|---------|--------|-------|---------|---|
| IL6R - Interleukin-6 receptor subunit alpha                                                          | 1   | 63105  | 63104   | 63104  | -1.17 | 2.4E-01 | 0 |
| Factor VII (at exam 5, GEE, adjusted for multivariable)                                              | 1   | 69430  | 69430   | 69430  | -1.17 | 2.4E-01 | 0 |
| Severe gingival inflammation                                                                         | 1   | 62660  | 62660   | 62660  | -1.16 | 2.4E-01 | 0 |
| Cereal type: Biscuit cereal (e.g. Weetabix)                                                          | 1   | 63526  | 63526   | 63526  | -1.16 | 2.4E-01 | 0 |
| Amino acid::Alanine and aspartate metabolism::N-acetylalanine                                        | 1   | 62631  | 62630   | 62630  | -1.16 | 2.4E-01 | 0 |
| Interleukin 6 (at exam 7, GEE, adjusted for multivariable)                                           | 3   | 174616 | 459431  | 114955 | -1.16 | 2.5E-01 | 0 |
| Factor VII (at exam 5, GEE, adjusted for age and sex)                                                | 1   | 69430  | 69430   | 69430  | -1.16 | 2.5E-01 | 0 |
| Diagnoses - secondary ICD10: R10 Abdominal and pelvic pain                                           | 1   | 68013  | 68013   | 68013  | -1.16 | 2.5E-01 | 0 |
| Anterior limb of internal capsule mean diuivities                                                    | 4   | 270164 | 623454  | 64008  | -1.16 | 2.5E-01 | 0 |
| FTH1 FTL - Ferritin                                                                                  | 1   | 69148  | 69148   | 69148  | -1.16 | 2.5E-01 | 0 |
| Waist circumference (female)                                                                         | 30  | 461045 | 957167  | 224040 | -1.16 | 2.5E-01 | 0 |
| Nonischemic cardiomyopathy                                                                           | 1   | 76263  | 76263   | 76263  | -1.16 | 2.5E-01 | 0 |
| Age at death (GEE, adjusted for birth-cohort)                                                        | 13  | 357680 | 964500  | 127921 | -1.16 | 2.5E-01 | 0 |
| Residual from predicted FEV1 for latest exam (GEE, adjusted for multiple covariates)                 | 1   | 66461  | 66461   | 66461  | -1.15 | 2.5E-01 | 0 |
| ::::X-14473                                                                                          | 1   | 82250  | 82250   | 82250  | -1.15 | 2.5E-01 | 0 |
| Mean internal carotid artery IMT (at exam 6, GEE, adjusted for age and sex)                          | 1   | 78194  | 78194   | 78194  | -1.15 | 2.5E-01 | 0 |
| ::::X-13741                                                                                          | 1   | 72422  | 72422   | 72422  | -1.15 | 2.5E-01 | 0 |
| Mean high-density lipoprotein cholesterol from exam 1-7 (GEE, adjusted for multivariable)            | 2   | 251804 | 300259  | 203348 | -1.15 | 2.5E-01 | 0 |
| Nucleotide::Purine metabolism, (hypo)xanthine, inosine containing::inosine                           | 1   | 71707  | 71707   | 71707  | -1.15 | 2.5E-01 | 0 |
| ENTPD5 - Ectonucleoside triphosphate diphosphohydrolase 5                                            | 1   | 76428  | 76428   | 76428  | -1.15 | 2.5E-01 | 0 |
| IGFBP3 - Insulin-like growth factor-binding protein 3                                                | 1   | 73830  | 73830   | 73830  | -1.15 | 2.5E-01 | 0 |
| Time spent driving                                                                                   | 2   | 256746 | 372968  | 140524 | -1.15 | 2.5E-01 | 0 |
| Triglyceride / High-density lipoprotein cholesterol ratio (at exam 3, GEE, adjusted for age and sex) | 1   | 78118  | 78118   | 78118  | -1.14 | 2.5E-01 | 0 |
| Cofactors and vitamins::Pantothenate and CoA metabolism::pantothenate                                | 1   | 72590  | 72590   | 72590  | -1.14 | 2.5E-01 | 0 |
| Mean total cholesterol from exam 1-7 (GEE, adjusted for age and sex)                                 | 1   | 75871  | 75871   | 75871  | -1.14 | 2.5E-01 | 0 |
| Alcohol dependency (random effect model for unrelated genotyped individuals)                         | 1   | 81986  | 81986   | 81986  | -1.14 | 2.5E-01 | 0 |
| Alcohol dependency (fixed effect model for unrelated genotyped individuals)                          | 1   | 81986  | 81986   | 81986  | -1.14 | 2.5E-01 | 0 |
| ::::X-12855                                                                                          | 1   | 85556  | 85556   | 85556  | -1.14 | 2.5E-01 | 0 |
| MIA - Melanoma-derived growth regulatory protein                                                     | 1   | 71989  | 71989   | 71989  | -1.14 | 2.6E-01 | 0 |
| SIRT2 - NAD-dependent protein deacetylase sirtuin-2                                                  | 1   | 83338  | 83338   | 83338  | -1.14 | 2.6E-01 | 0 |
| Vitamin K plasma phyloquinone (at exam 6 or 7, GEE, adjusted for multivariable)                      | 1   | 78622  | 78622   | 78622  | -1.13 | 2.6E-01 | 0 |
| NCR3 - Natural cytotoxicity triggering receptor 3                                                    | 1   | 90180  | 90180   | 90180  | -1.13 | 2.6E-01 | 0 |
| Conscientiousness (NEO-FFI)                                                                          | 1   | 75362  | 75362   | 75362  | -1.13 | 2.6E-01 | 0 |
| DKK4 - Dickkopf-related protein 4                                                                    | 1   | 83338  | 83338   | 83338  | -1.13 | 2.6E-01 | 0 |
| Own or rent accommodation lived in: Rent - from private landlord or letting agency                   | 1   | 87761  | 87761   | 87761  | -1.13 | 2.6E-01 | 0 |
| Body of corpus callosum mode of anisotropy                                                           | 2   | 261746 | 368255  | 155236 | -1.13 | 2.6E-01 | 0 |
| Right transverse temporal                                                                            | 1   | 87790  | 87790   | 87790  | -1.13 | 2.6E-01 | 0 |
| Maximum internal carotid artery IMT (at exam 6, GEE, adjusted for age and sex)                       | 1   | 78194  | 78194   | 78194  | -1.13 | 2.6E-01 | 0 |
| THBS4 - Thrombospondin-4                                                                             | 1   | 98210  | 98210   | 98210  | -1.13 | 2.6E-01 | 0 |
| Frequency of consuming six or more units of alcohol                                                  | 6   | 306314 | 768224  | 34029  | -1.13 | 2.6E-01 | 0 |
| Education - Qualifications                                                                           | 126 | 574844 | 1087806 | 70971  | -1.13 | 2.6E-01 | 0 |
| Diagnoses - main ICD10: M16 Osteoarthritis of hip                                                    | 10  | 343796 | 693370  | 106550 | -1.13 | 2.6E-01 | 0 |
| Lipid::Fatty acid, dicarboxylate::3-carboxy-4-methyl-5-propyl-2-furanpropanoate (CMPF)               | 1   | 83759  | 83759   | 83759  | -1.12 | 2.6E-01 | 0 |

|                                                                                                                     |     |        |         |        |       |         |   |
|---------------------------------------------------------------------------------------------------------------------|-----|--------|---------|--------|-------|---------|---|
| Xenobiotics::Sugar, sugar substitute, starch::erythritol                                                            | 1   | 91344  | 91344   | 91344  | -1.12 | 2.6E-01 | 0 |
| KNG1 - Kininogen-1                                                                                                  | 1   | 76945  | 76945   | 76945  | -1.12 | 2.6E-01 | 0 |
| High-density lipoprotein 2 cholesterol (at exam 5, GEE, adjusted for age and sex)                                   | 1   | 83680  | 83680   | 83680  | -1.12 | 2.6E-01 | 0 |
| Urinary albumin excretion in hypertensive enriched sample (at exam 6, GEE, adjusted for age and sex)                | 1   | 96326  | 96326   | 96326  | -1.11 | 2.7E-01 | 0 |
| Urinary albumin excretion in hypertensive enriched sample (at exam 6, GEE, adjusted for multivariable)              | 1   | 96326  | 96326   | 96326  | -1.11 | 2.7E-01 | 0 |
| Mean common carotid artery IMT (at exam 6, GEE, adjusted for multivariable)                                         | 1   | 92642  | 92642   | 92642  | -1.11 | 2.7E-01 | 0 |
| MICB - MHC class I polypeptide-related sequence B                                                                   | 1   | 94062  | 94062   | 94062  | -1.11 | 2.7E-01 | 0 |
| External capsule mean diastolicities                                                                                | 2   | 270164 | 368162  | 172166 | -1.11 | 2.7E-01 | 0 |
| tPA (at exam 5, GEE, adjusted for multivariable)                                                                    | 1   | 95528  | 95528   | 95528  | -1.11 | 2.7E-01 | 0 |
| Right cuneus                                                                                                        | 5   | 257275 | 543158  | 151319 | -1.11 | 2.7E-01 | 0 |
| Insulin sensitivity (GEE, adjusted for age, sex and BMI)                                                            | 1   | 92573  | 92573   | 92573  | -1.11 | 2.7E-01 | 0 |
| Lipid::Bile acid metabolism::glycochenodeoxycholate                                                                 | 1   | 97843  | 97843   | 97843  | -1.11 | 2.7E-01 | 0 |
| Illnesses of siblings: Severe depression                                                                            | 1   | 109402 | 109402  | 109402 | -1.10 | 2.7E-01 | 0 |
| Splenium of corpus callosum axial diastolicities                                                                    | 2   | 276832 | 381652  | 172011 | -1.10 | 2.7E-01 | 0 |
| Gamma-glutamyl transferase (at exam 2, GEE, adjusted for age and sex)                                               | 1   | 104295 | 104295  | 104295 | -1.10 | 2.7E-01 | 0 |
| Primary angle closure glaucoma                                                                                      | 8   | 336599 | 570258  | 53689  | -1.10 | 2.7E-01 | 0 |
| 1p deletion neuroblastoma                                                                                           | 3   | 200598 | 241084  | 121469 | -1.10 | 2.7E-01 | 0 |
| SIGLEC14 - Sialic acid-binding Ig-like lectin 14                                                                    | 1   | 100117 | 100117  | 100117 | -1.10 | 2.7E-01 | 0 |
| 11q deletion neuroblastoma                                                                                          | 3   | 200598 | 395628  | 170245 | -1.10 | 2.7E-01 | 0 |
| Ratio of bisallylic bonds to double bonds in lipids                                                                 | 2   | 279550 | 406535  | 152566 | -1.10 | 2.7E-01 | 0 |
| Neck cross-sectional moment of inertia (GEE, female, adjusted for age)                                              | 1   | 108175 | 108174  | 108174 | -1.09 | 2.7E-01 | 0 |
| SERPINA3 - alpha-1-antichymotrypsin complex                                                                         | 1   | 105475 | 105475  | 105475 | -1.09 | 2.7E-01 | 0 |
| Heart failure                                                                                                       | 1   | 102578 | 102578  | 102578 | -1.09 | 2.8E-01 | 0 |
| Depression - Trouble falling or staying asleep, or sleeping too much                                                | 1   | 96727  | 96727   | 96727  | -1.09 | 2.8E-01 | 0 |
| LGALS3 - Galectin-3                                                                                                 | 1   | 99542  | 99542   | 99542  | -1.09 | 2.8E-01 | 0 |
| SERPINA3 - Alpha-1-antichymotrypsin                                                                                 | 1   | 105475 | 105475  | 105475 | -1.08 | 2.8E-01 | 0 |
| Bread type: Wholemeal or wholegrain                                                                                 | 14  | 393296 | 1151058 | 77991  | -1.08 | 2.8E-01 | 0 |
| DKK3 - Dickkopf-related protein 3                                                                                   | 1   | 105130 | 105130  | 105130 | -1.08 | 2.8E-01 | 0 |
| Posterior limb of internal capsule fractional anisotropy                                                            | 8   | 343513 | 806896  | 78111  | -1.08 | 2.8E-01 | 0 |
| Eye problems/disorders: Cataract                                                                                    | 2   | 277362 | 357695  | 197029 | -1.08 | 2.8E-01 | 0 |
| Trunk-trunk fat ratio (female)                                                                                      | 184 | 596538 | 1172396 | 86587  | -1.08 | 2.8E-01 | 0 |
| ACP1 - Low molecular weight phosphotyrosine protein phosphatase                                                     | 1   | 112461 | 112461  | 112461 | -1.07 | 2.8E-01 | 0 |
| Psoriasis                                                                                                           | 5   | 269828 | 367203  | 157010 | -1.07 | 2.8E-01 | 0 |
| Reticulocyte count (three-way meta)                                                                                 | 109 | 570260 | 1100540 | 106267 | -1.07 | 2.8E-01 | 0 |
| CASP3 - Caspase-3                                                                                                   | 1   | 121828 | 121828  | 121828 | -1.07 | 2.9E-01 | 0 |
| GPNMB - Transmembrane glycoprotein NMB                                                                              | 1   | 127137 | 127137  | 127137 | -1.07 | 2.9E-01 | 0 |
| CD123 on 11c+123+DC                                                                                                 | 6   | 319690 | 510082  | 142118 | -1.06 | 2.9E-01 | 0 |
| Amino acid::Polyamine metabolism::X-03056--N-[3-(2-Oxopyrrolidin-1-yl)propyl]acetamide                              | 3   | 209582 | 343057  | 128382 | -1.06 | 2.9E-01 | 0 |
| Urinary albumin excretion of at least 30 in enriched hypertensive sample (at exam 6, GEE, adjusted for age and sex) | 128 | 580163 | 962323  | 252430 | -1.06 | 2.9E-01 | 0 |
| Subjective well being                                                                                               | 1   | 117951 | 117951  | 117951 | -1.06 | 2.9E-01 | 0 |
| NOV - Protein NOV homolog                                                                                           | 1   | 129775 | 129775  | 129775 | -1.06 | 2.9E-01 | 0 |
| Disposition index (adjusted for BMI)                                                                                | 1   | 134748 | 134748  | 134748 | -1.06 | 2.9E-01 | 0 |
| Gout                                                                                                                | 2   | 288515 | 415423  | 161608 | -1.05 | 2.9E-01 | 0 |

|                                                                                                      |    |        |         |        |       |         |   |
|------------------------------------------------------------------------------------------------------|----|--------|---------|--------|-------|---------|---|
| Shaft average buckling ratio (GEE, male, adjusted for multivariable)                                 | 1  | 128658 | 128658  | 128658 | -1.05 | 2.9E-01 | 0 |
| Neck-Shaft Angle (GEE, adjusted for multivariable)                                                   | 1  | 130815 | 130815  | 130815 | -1.05 | 2.9E-01 | 0 |
| Left isthmus cingulate                                                                               | 4  | 306495 | 721156  | 49208  | -1.05 | 3.0E-01 | 0 |
| Left vessel                                                                                          | 3  | 224226 | 605667  | 170768 | -1.05 | 3.0E-01 | 0 |
| ::::X-13069                                                                                          | 1  | 123964 | 123964  | 123964 | -1.04 | 3.0E-01 | 0 |
| Diagnoses - secondary ICD10: E66 Overweight and obesity                                              | 3  | 227601 | 386760  | 139639 | -1.04 | 3.0E-01 | 0 |
| Disposition index                                                                                    | 1  | 134748 | 134748  | 134748 | -1.04 | 3.0E-01 | 0 |
| Neck-Shaft Angle (GEE, adjusted for age and sex)                                                     | 1  | 130815 | 130815  | 130815 | -1.04 | 3.0E-01 | 0 |
| Alanine transaminase (at exam 2, GEE, adjusted for age and sex)                                      | 1  | 133607 | 133607  | 133607 | -1.04 | 3.0E-01 | 0 |
| 3Lhydroxybutyrate                                                                                    | 1  | 127709 | 127709  | 127709 | -1.03 | 3.0E-01 | 0 |
| Diagnoses - secondary ICD10: Z86 Personal history of certain other diseases                          | 3  | 225979 | 1377815 | 131869 | -1.03 | 3.0E-01 | 0 |
| Triglyceride / High-density lipoprotein cholesterol ratio (at exam 4, GEE, adjusted for age and sex) | 1  | 139078 | 139078  | 139078 | -1.03 | 3.1E-01 | 0 |
| AFM - Afamin                                                                                         | 1  | 146106 | 146106  | 146106 | -1.02 | 3.1E-01 | 0 |
| Diagnoses - secondary ICD10: F32 Major depressive disorder, single episode                           | 1  | 141002 | 141002  | 141002 | -1.02 | 3.1E-01 | 0 |
| Neck cross-sectional moment of inertia (GEE, male, adjusted for multivariable)                       | 1  | 135979 | 135979  | 135979 | -1.02 | 3.1E-01 | 0 |
| Right parahippocampal                                                                                | 1  | 140254 | 140254  | 140254 | -1.02 | 3.1E-01 | 0 |
| Major depressive disorder (females)                                                                  | 2  | 306760 | 420480  | 193040 | -1.01 | 3.1E-01 | 0 |
| Parkinson disease                                                                                    | 5  | 284488 | 1019892 | 115794 | -1.01 | 3.1E-01 | 0 |
| Coronary artery disease (SOFT definition including angina)                                           | 19 | 437615 | 643464  | 204980 | -1.01 | 3.1E-01 | 0 |
| Pain type(s) experienced in last month: Hip pain                                                     | 1  | 144252 | 144252  | 144252 | -1.00 | 3.2E-01 | 0 |
| Energy::Oxidative phosphorylation::acetylphosphate                                                   | 2  | 305180 | 406679  | 203682 | -1.00 | 3.2E-01 | 0 |
| High-density lipoprotein particle size by NMR (at exam 4, GEE, adjusted for age and sex)             | 1  | 148515 | 148515  | 148515 | -1.00 | 3.2E-01 | 0 |
| Extreme Body Mass Index                                                                              | 6  | 339575 | 621187  | 72550  | -1.00 | 3.2E-01 | 0 |
| Mean thyroid stimulation hormone from exam 3 and 4 (GEE, adjusted for age and sex)                   | 3  | 243416 | 759696  | 173253 | -0.99 | 3.2E-01 | 0 |
| Glucocorticoids                                                                                      | 12 | 406321 | 922544  | 156640 | -0.99 | 3.2E-01 | 0 |
| Blond hair in Solomon Islanders                                                                      | 1  | 150429 | 150429  | 150429 | -0.99 | 3.2E-01 | 0 |
| Bilateral oophorectomy (both ovaries removed) (female)                                               | 6  | 351934 | 726293  | 99518  | -0.99 | 3.2E-01 | 0 |
| Primary sclerosing cholangitis                                                                       | 1  | 160339 | 160339  | 160339 | -0.99 | 3.2E-01 | 0 |
| CGA FSHB - Follicle stimulating hormone                                                              | 1  | 156653 | 156653  | 156653 | -0.99 | 3.2E-01 | 0 |
| Ankle-brachial index (at exam 6, GEE, adjusted for age and sex)                                      | 2  | 309009 | 398106  | 219912 | -0.99 | 3.2E-01 | 0 |
| Amino acid::Creatine metabolism::creatinine                                                          | 1  | 168503 | 168503  | 168503 | -0.99 | 3.2E-01 | 0 |
| Prospective memory test - Time to answer                                                             | 1  | 156966 | 156966  | 156966 | -0.98 | 3.3E-01 | 0 |
| Xenobiotics::Xanthine metabolism::7-methylxanthine                                                   | 1  | 169008 | 169008  | 169008 | -0.98 | 3.3E-01 | 0 |
| Percent predicted FEV1/FVC for latest exam (GEE, adjusted for multiple covariates)                   | 2  | 313860 | 444314  | 183406 | -0.98 | 3.3E-01 | 0 |
| Pericardial adipose tissue volume (adjusted for height and weight)                                   | 3  | 249751 | 604247  | 153668 | -0.98 | 3.3E-01 | 0 |
| Anxiety - Recent worrying too much about different things                                            | 1  | 165224 | 165224  | 165224 | -0.98 | 3.3E-01 | 0 |
| CD300C - CMRF35-like molecule 6                                                                      | 1  | 169106 | 169106  | 169106 | -0.98 | 3.3E-01 | 0 |
| PLA2G2A - Phospholipase A2, membrane associated                                                      | 1  | 162662 | 162662  | 162662 | -0.97 | 3.3E-01 | 0 |
| Residual from predicted FEV1/FVC for latest exam (GEE, adjusted for multiple covariates)             | 2  | 313860 | 444314  | 183406 | -0.97 | 3.3E-01 | 0 |
| Estimated glomerular filtration rate based on cystatin C                                             | 21 | 461418 | 852025  | 75316  | -0.97 | 3.3E-01 | 0 |
| Coronary artery disease                                                                              | 59 | 547253 | 942629  | 149970 | -0.97 | 3.3E-01 | 0 |
| Low-density lipoprotein cholesterol (at exam 7, GEE, adjusted for age and sex)                       | 3  | 258490 | 375309  | 198934 | -0.97 | 3.3E-01 | 0 |
| ::::X-13496                                                                                          | 2  | 328038 | 463909  | 192168 | -0.97 | 3.3E-01 | 0 |

|                                                                                                        |     |        |         |        |       |         |   |
|--------------------------------------------------------------------------------------------------------|-----|--------|---------|--------|-------|---------|---|
| LEPR - Leptin receptor                                                                                 | 1   | 171856 | 171856  | 171856 | -0.97 | 3.3E-01 | 0 |
| CPB2 - Carboxypeptidase B2                                                                             | 1   | 180436 | 180436  | 180436 | -0.96 | 3.4E-01 | 0 |
| Skin colour                                                                                            | 141 | 592280 | 1057190 | 80257  | -0.96 | 3.4E-01 | 0 |
| Small high-density lipoprotein by NMR (at exam 4, GEE, adjusted for age and sex)                       | 5   | 312530 | 581883  | 118377 | -0.96 | 3.4E-01 | 0 |
| Monocyte percentage of white cells (two-way meta)                                                      | 93  | 576443 | 1006610 | 51702  | -0.96 | 3.4E-01 | 0 |
| Low-density lipoprotein cholesterol (at exam 1, GEE, adjusted for multivariable)                       | 2   | 319872 | 454121  | 185623 | -0.95 | 3.4E-01 | 0 |
| Percent predicted FEV1 for latest exam (GEE, adjusted for multiple covariates)                         | 2   | 336659 | 470782  | 202535 | -0.95 | 3.4E-01 | 0 |
| Right lingual                                                                                          | 2   | 328520 | 445639  | 211401 | -0.95 | 3.4E-01 | 0 |
| Low-density lipoprotein cholesterol (at exam 3, GEE, adjusted for age and sex)                         | 2   | 332975 | 460673  | 205278 | -0.95 | 3.4E-01 | 0 |
| Miserableness (MIS)                                                                                    | 32  | 508028 | 1096294 | 83254  | -0.94 | 3.5E-01 | 0 |
| Non-butter spread type details: Soft (tub) margarine                                                   | 1   | 182155 | 182155  | 182155 | -0.94 | 3.5E-01 | 0 |
| NKearly:%337+158b+                                                                                     | 1   | 178749 | 178749  | 178749 | -0.94 | 3.5E-01 | 0 |
| Urinary albumin excretion (at exam 6, GEE, adjusted for multivariable)                                 | 1   | 186388 | 186388  | 186388 | -0.94 | 3.5E-01 | 0 |
| Asthma (fixed effect model)                                                                            | 21  | 465193 | 1011813 | 136209 | -0.94 | 3.5E-01 | 0 |
| Social support - Leisure/social activities: Other group activity                                       | 5   | 309555 | 984592  | 256188 | -0.93 | 3.5E-01 | 0 |
| Tobacco smoking                                                                                        | 4   | 338065 | 777539  | 40820  | -0.93 | 3.5E-01 | 0 |
| Types of physical activity in last 4 weeks: Other exercises (eg: swimming, cycling, keep fit, bowling) | 9   | 379430 | 638813  | 256820 | -0.92 | 3.6E-01 | 0 |
| Interleukin-13                                                                                         | 1   | 200425 | 200425  | 200425 | -0.92 | 3.6E-01 | 0 |
| MAP2K2 - Dual specificity mitogen-activated protein kinase kinase 2                                    | 1   | 194036 | 194036  | 194036 | -0.92 | 3.6E-01 | 0 |
| Visual memory composite score (GEE, adjusted for multivariable)                                        | 3   | 275695 | 650359  | 193286 | -0.92 | 3.6E-01 | 0 |
| Height SDS (male at age 12)                                                                            | 1   | 203205 | 203205  | 203205 | -0.92 | 3.6E-01 | 0 |
| Milk type used: Skimmed                                                                                | 5   | 323715 | 685363  | 67861  | -0.92 | 3.6E-01 | 0 |
| Ever had same-sex intercourse                                                                          | 3   | 276390 | 337001  | 161982 | -0.92 | 3.6E-01 | 0 |
| Sodium                                                                                                 | 11  | 407960 | 1181650 | 63995  | -0.92 | 3.6E-01 | 0 |
| Shaft average buckling ratio (GEE, female, adjusted for age)                                           | 2   | 337619 | 467762  | 207476 | -0.92 | 3.6E-01 | 0 |
| Weight (male)                                                                                          | 9   | 382215 | 1187630 | 64317  | -0.91 | 3.6E-01 | 0 |
| Immunoglobulin A deficiency                                                                            | 1   | 199865 | 199865  | 199865 | -0.91 | 3.6E-01 | 0 |
| MMSE score (at exam 5, GEE, adjusted for multivariable)                                                | 3   | 274398 | 687744  | 163966 | -0.91 | 3.6E-01 | 0 |
| .....X-11261                                                                                           | 1   | 209582 | 209582  | 209582 | -0.91 | 3.6E-01 | 0 |
| Total body BMD (60 or older)                                                                           | 17  | 449128 | 928078  | 87540  | -0.90 | 3.7E-01 | 0 |
| Platelets                                                                                              | 23  | 475608 | 950306  | 161699 | -0.90 | 3.7E-01 | 0 |
| AKR1A1 - Alcohol dehydrogenase [NADP(+)]                                                               | 1   | 202076 | 202076  | 202076 | -0.90 | 3.7E-01 | 0 |
| Lipid::Monoacylglycerol::1-linoleoylglycerol (1-monolinolein)                                          | 1   | 201998 | 201998  | 201998 | -0.90 | 3.7E-01 | 0 |
| Albumin                                                                                                | 11  | 404728 | 1181053 | 85602  | -0.90 | 3.7E-01 | 0 |
| MET - Hepatocyte growth factor receptor                                                                | 2   | 348838 | 515803  | 181873 | -0.90 | 3.7E-01 | 0 |
| Mean MMSE score for exam 5 and 7 (GEE, adjusted for multivariable)                                     | 1   | 213150 | 213150  | 213150 | -0.90 | 3.7E-01 | 0 |
| Phospholipids in medium LDL                                                                            | 9   | 385130 | 818555  | 106456 | -0.90 | 3.7E-01 | 0 |
| Lipid::Lysolipid::2-stearoylglycerophosphocholine*                                                     | 1   | 213700 | 213700  | 213700 | -0.89 | 3.7E-01 | 0 |
| KDR - Vascular endothelial growth factor receptor 2                                                    | 2   | 354096 | 518432  | 189760 | -0.89 | 3.7E-01 | 0 |
| Cisplatin-associated ototoxicity                                                                       | 1   | 215406 | 215406  | 215406 | -0.89 | 3.7E-01 | 0 |
| Cystatin C (at exam 7, GEE, adjusted for age and sex)                                                  | 1   | 213150 | 213150  | 213150 | -0.89 | 3.8E-01 | 0 |
| CCL16 - C-C motif chemokine 16                                                                         | 1   | 213623 | 213623  | 213623 | -0.89 | 3.8E-01 | 0 |
| Amino acid::Valine, leucine and isoleucine metabolism::2-methylbutyrylcarnitine                        | 1   | 209582 | 209582  | 209582 | -0.88 | 3.8E-01 | 0 |

|                                                                                     |    |        |         |        |       |         |   |
|-------------------------------------------------------------------------------------|----|--------|---------|--------|-------|---------|---|
| RR interval (female, cohort exam 11 offspring exam 1, GEE, adjusted for age nad RR) | 2  | 344529 | 502637  | 186421 | -0.88 | 3.8E-01 | 0 |
| Dehydroepiandrosterone sulfate (at exam 3, GEE, adjusted for multivariable)         | 5  | 330020 | 409593  | 45480  | -0.88 | 3.8E-01 | 0 |
| Lipid::Carnitine metabolism::laurylcarnitine                                        | 1  | 216130 | 216130  | 216130 | -0.88 | 3.8E-01 | 0 |
| Right supramarginal                                                                 | 3  | 300553 | 495426  | 162765 | -0.88 | 3.8E-01 | 0 |
| Total lipids in medium LDL                                                          | 12 | 435135 | 1050478 | 86744  | -0.87 | 3.8E-01 | 0 |
| Bisecting GlcNAc                                                                    | 2  | 356250 | 447470  | 265030 | -0.87 | 3.8E-01 | 0 |
| Cystatin C (at exam 7, GEE, adjusted for multivariable)                             | 1  | 213150 | 213150  | 213150 | -0.87 | 3.8E-01 | 0 |
| Total cholesterol in IDL                                                            | 12 | 435135 | 1095218 | 95473  | -0.87 | 3.9E-01 | 0 |
| Left lateral orbitofrontal                                                          | 2  | 357608 | 493928  | 221288 | -0.86 | 3.9E-01 | 0 |
| Obesity class 3                                                                     | 2  | 360811 | 426552  | 295070 | -0.86 | 3.9E-01 | 0 |
| Lipid::Fatty acid, monohydroxy::2-hydroxypalmitate                                  | 1  | 221208 | 221208  | 221208 | -0.86 | 3.9E-01 | 0 |
| Amino acid::Phenylalanine & tyrosine metabolism::X-11423--O-sulfo-L-tyrosine        | 2  | 366162 | 524465  | 207859 | -0.86 | 3.9E-01 | 0 |
| :::X-11334                                                                          | 1  | 213132 | 213132  | 213132 | -0.86 | 3.9E-01 | 0 |
| Mineral and other dietary supplements: Iron                                         | 1  | 235206 | 235206  | 235206 | -0.86 | 3.9E-01 | 0 |
| Age at death (GEE, adjusted for multivariable)                                      | 12 | 435141 | 746174  | 219740 | -0.86 | 3.9E-01 | 0 |
| Lipoprotein A (at exam 3, GEE, adjusted for age and sex)                            | 16 | 467165 | 918525  | 155511 | -0.86 | 3.9E-01 | 0 |
| Treatment/medication code: lisinopril                                               | 3  | 298338 | 693795  | 174102 | -0.85 | 3.9E-01 | 0 |
| Celiac disease                                                                      | 38 | 533051 | 1057677 | 126359 | -0.85 | 3.9E-01 | 0 |
| Vitamin D plasma 25(OH)-D (at exam 6 or 7, GEE, adjusted for multivariable)         | 1  | 221840 | 221840  | 221840 | -0.85 | 3.9E-01 | 0 |
| Anterior corona radiata axial diuivities                                            | 3  | 303995 | 416168  | 168223 | -0.85 | 3.9E-01 | 0 |
| Depression                                                                          | 40 | 536490 | 958729  | 68205  | -0.85 | 4.0E-01 | 0 |
| SELP - P-Selectin                                                                   | 2  | 363678 | 523223  | 204133 | -0.85 | 4.0E-01 | 0 |
| Periodontal complex trait 1 - Socransky trait                                       | 5  | 348638 | 532088  | 57663  | -0.84 | 4.0E-01 | 0 |
| Dapsone hypersensitivity syndrome                                                   | 1  | 230508 | 230508  | 230508 | -0.84 | 4.0E-01 | 0 |
| Retrolenticular part of internal capsule radial diuivities                          | 6  | 388821 | 640041  | 97264  | -0.84 | 4.0E-01 | 0 |
| Neck Cross-Sectional Moment of Inertia (GEE, adjusted for age and sex)              | 3  | 313900 | 675333  | 208294 | -0.84 | 4.0E-01 | 0 |
| Social support - Leisure/social activities: Religious group                         | 41 | 543158 | 1075395 | 84723  | -0.83 | 4.0E-01 | 0 |
| Fasting glucose main effect (adjusted for BMI)                                      | 20 | 484658 | 1055847 | 117412 | -0.83 | 4.0E-01 | 0 |
| Triglycerides (at exam 3, GEE, adjusted for age and sex)                            | 1  | 237183 | 237183  | 237183 | -0.83 | 4.1E-01 | 0 |
| Time spent watching television (TV)                                                 | 94 | 588114 | 1210895 | 86453  | -0.83 | 4.1E-01 | 0 |
| HGFAC - Hepatocyte growth factor activator                                          | 2  | 372572 | 539840  | 205304 | -0.83 | 4.1E-01 | 0 |
| Walking speed (at exam 7, GEE)                                                      | 2  | 373150 | 415107  | 331193 | -0.83 | 4.1E-01 | 0 |
| TLR4 LY96 - Toll-like receptor 4:Lymphocyte antigen 96 complex                      | 2  | 367728 | 525248  | 210208 | -0.82 | 4.1E-01 | 0 |
| SMPDL3A - Acid sphingomyelinase-like phosphodiesterase 3a                           | 1  | 254480 | 254480  | 254480 | -0.82 | 4.1E-01 | 0 |
| Tumor necrosis factor alpha (at exam 7, GEE, adjusted for age and sex)              | 2  | 373314 | 541329  | 205298 | -0.82 | 4.1E-01 | 0 |
| Primary biliary cirrhosis                                                           | 17 | 471018 | 837185  | 72818  | -0.82 | 4.1E-01 | 0 |
| High-density lipoprotein cholesterol (at exam 6, GEE, adjusted for age and sex)     | 1  | 261068 | 261068  | 261068 | -0.82 | 4.1E-01 | 0 |
| Frequency of other exercises in last 4 weeks                                        | 1  | 247745 | 247745  | 247745 | -0.82 | 4.1E-01 | 0 |
| Walking speed (at offspring exam 7 cohort exam 27, GEE)                             | 2  | 373150 | 415107  | 331193 | -0.81 | 4.2E-01 | 0 |
| Sleep durataion (conditioning sex and BMI)                                          | 8  | 415726 | 1113755 | 47191  | -0.81 | 4.2E-01 | 0 |
| CCL7 - C-C motif chemokine 7                                                        | 1  | 253743 | 253743  | 253743 | -0.81 | 4.2E-01 | 0 |
| Total lipids in small HDL                                                           | 7  | 385130 | 870363  | 14263  | -0.81 | 4.2E-01 | 0 |
| IL22RA2 - Interleukin-22 receptor subunit alpha-2                                   | 1  | 256605 | 256605  | 256605 | -0.81 | 4.2E-01 | 0 |

|                                                                                                     |     |        |         |        |       |         |   |
|-----------------------------------------------------------------------------------------------------|-----|--------|---------|--------|-------|---------|---|
| Lipid::Essential fatty acid::dihomo-linolenate (20:3n3 or n6)                                       | 2   | 378892 | 532005  | 225779 | -0.81 | 4.2E-01 | 0 |
| CCL21 - C-C motif chemokine 21                                                                      | 1   | 261233 | 261232  | 261232 | -0.81 | 4.2E-01 | 0 |
| Albumin/globulin ratio                                                                              | 36  | 538656 | 982466  | 159788 | -0.81 | 4.2E-01 | 0 |
| Bone Ultrasound Attenuation (GEE, adjusted for multivariable)                                       | 1   | 258733 | 258732  | 258732 | -0.81 | 4.2E-01 | 0 |
| Diagnoses - secondary ICD10: I48 Atrial fibrillation and flutter                                    | 18  | 482194 | 960957  | 85545  | -0.80 | 4.2E-01 | 0 |
| Sabuctaneous fat by CT (GEE, adjusted for age, sex, smoking and menopause)                          | 3   | 323475 | 725280  | 275570 | -0.79 | 4.3E-01 | 0 |
| CD27 - CD27 antigen                                                                                 | 1   | 254023 | 254023  | 254023 | -0.79 | 4.3E-01 | 0 |
| Similarities raw score (GEE, adjusted for multivariable)                                            | 1   | 270908 | 270908  | 270908 | -0.79 | 4.3E-01 | 0 |
| Viscosity I (at exam 5, GEE, adjusted for age and sex)                                              | 3   | 330808 | 821301  | 175665 | -0.79 | 4.3E-01 | 0 |
| Sabuctaneous fat by CT (GEE, adjusted for age and sex)                                              | 3   | 323475 | 725280  | 275570 | -0.79 | 4.3E-01 | 0 |
| Educational attainment                                                                              | 471 | 637770 | 1144603 | 112184 | -0.79 | 4.3E-01 | 0 |
| Mean high-density lipoprotein cholesterol from exam 1-7 (GEE, adjusted for age and sex)             | 2   | 388291 | 512898  | 263684 | -0.79 | 4.3E-01 | 0 |
| Types of transport used (excluding work): Public transport                                          | 4   | 391594 | 917194  | 79860  | -0.78 | 4.3E-01 | 0 |
| Adiponectin                                                                                         | 9   | 420263 | 508473  | 34787  | -0.78 | 4.3E-01 | 0 |
| Wide Range Achievement Test (GEE, adjusted for multivariable)                                       | 1   | 262548 | 262548  | 262548 | -0.78 | 4.3E-01 | 0 |
| Ratio of visceral-tosubcutaneous adipose tissue volume (adjusted for BMI, female)                   | 1   | 269605 | 269605  | 269605 | -0.78 | 4.4E-01 | 0 |
| ANG - Angiogenin                                                                                    | 1   | 272390 | 272390  | 272390 | -0.78 | 4.4E-01 | 0 |
| Gray matter                                                                                         | 5   | 370350 | 921158  | 62138  | -0.77 | 4.4E-01 | 0 |
| High-density lipoprotein cholesterol (at exam 2, GEE, adjusted for age and sex)                     | 4   | 397353 | 671840  | 231969 | -0.77 | 4.4E-01 | 0 |
| NXP1 - Neurexophilin-1                                                                              | 1   | 279333 | 279333  | 279333 | -0.77 | 4.4E-01 | 0 |
| FCN1 - Ficolin-1                                                                                    | 1   | 278583 | 278583  | 278583 | -0.77 | 4.4E-01 | 0 |
| CCL1 - C-C motif chemokine 1                                                                        | 1   | 279333 | 279333  | 279333 | -0.76 | 4.5E-01 | 0 |
| Potassium                                                                                           | 7   | 412018 | 756058  | 51825  | -0.76 | 4.5E-01 | 0 |
| Femoral BMD (GEE, adjusted for multivariable)                                                       | 1   | 294198 | 294198  | 294198 | -0.76 | 4.5E-01 | 0 |
| FEV1/FCV                                                                                            | 6   | 415331 | 570311  | 315943 | -0.75 | 4.5E-01 | 0 |
| Reason for glasses/contact lenses: For long-sightedness, i.e. for distance and near, but particular | 4   | 401899 | 710946  | 134303 | -0.75 | 4.5E-01 | 0 |
| Basophil count                                                                                      | 23  | 512150 | 1190899 | 76009  | -0.75 | 4.5E-01 | 0 |
| Left caudal anterior cingulate                                                                      | 4   | 402908 | 780317  | 91580  | -0.75 | 4.5E-01 | 0 |
| Troch Neck BMD (GEE, male, adjussted for multivariable)                                             | 2   | 402444 | 584057  | 220831 | -0.75 | 4.5E-01 | 0 |
| Heart rate variability (pvRSA/HF)                                                                   | 7   | 406100 | 930565  | 76558  | -0.75 | 4.5E-01 | 0 |
| Creatinine                                                                                          | 4   | 397978 | 715134  | 145730 | -0.75 | 4.6E-01 | 0 |
| Free cholesterol in large LDL                                                                       | 10  | 453360 | 937892  | 173578 | -0.74 | 4.6E-01 | 0 |
| Fornix (column and body of fornix) radial diusivities                                               | 4   | 403400 | 850859  | 243339 | -0.74 | 4.6E-01 | 0 |
| Depression - Recent changes in speed/amount of moving or speaking                                   | 2   | 411778 | 589381  | 234174 | -0.74 | 4.6E-01 | 0 |
| Lipid::Medium chain fatty acid::caprate (10:0)                                                      | 2   | 412974 | 526115  | 299834 | -0.74 | 4.6E-01 | 0 |
| HFE2 - Hemojuvelin                                                                                  | 1   | 299470 | 299470  | 299470 | -0.74 | 4.6E-01 | 0 |
| Fasting HbA1c (at exam 7, GEE, adjusted for age and sex)                                            | 1   | 294975 | 294975  | 294975 | -0.73 | 4.6E-01 | 0 |
| PNN50 HRV (cohort exam 18 offspring exam 3, GEE, adjusted for age and HR)                           | 1   | 298460 | 298460  | 298460 | -0.73 | 4.7E-01 | 0 |
| Traumatic events - Witnessed sudden violent death                                                   | 1   | 295505 | 295505  | 295505 | -0.72 | 4.7E-01 | 0 |
| Body of corpus callosum radial diusivities                                                          | 1   | 303995 | 303995  | 303995 | -0.72 | 4.7E-01 | 0 |
| ESR1 - Estrogen receptor                                                                            | 1   | 300060 | 300060  | 300060 | -0.72 | 4.7E-01 | 0 |
| Urinary albumin excretion of at least 30 in enriched hypertensive sample (at exam 6, GEE, adjust    | 86  | 596151 | 921702  | 271061 | -0.72 | 4.7E-01 | 0 |
| Social support - Leisure/social activities: Adult education class                                   | 2   | 419401 | 605997  | 232805 | -0.72 | 4.7E-01 | 0 |

|                                                                                                      |    |        |         |        |       |         |   |
|------------------------------------------------------------------------------------------------------|----|--------|---------|--------|-------|---------|---|
| Mouth/teeth dental problems: Mouth ulcers                                                            | 27 | 528883 | 969554  | 173262 | -0.72 | 4.7E-01 | 0 |
| Glycine level                                                                                        | 34 | 546529 | 1088058 | 58887  | -0.72 | 4.7E-01 | 0 |
| Visuospatial memory and organization (GEE, adjusted for multivariable)                               | 1  | 296015 | 296015  | 296015 | -0.71 | 4.8E-01 | 0 |
| Amino acid::Valine, leucine and isoleucine metabolism::levulinate (4-oxovalerate)                    | 1  | 309273 | 309273  | 309273 | -0.71 | 4.8E-01 | 0 |
| Diagnoses - secondary ICD10: M19 Other and unspecified osteoarthritis                                | 1  | 313033 | 313033  | 313033 | -0.71 | 4.8E-01 | 0 |
| Concentration of small HDL particles                                                                 | 5  | 395798 | 1344928 | 17101  | -0.71 | 4.8E-01 | 0 |
| Ulcerative Colitis                                                                                   | 27 | 531558 | 890296  | 164281 | -0.71 | 4.8E-01 | 0 |
| Father still alive                                                                                   | 3  | 361718 | 625385  | 200031 | -0.71 | 4.8E-01 | 0 |
| Water intake                                                                                         | 26 | 536603 | 1007956 | 81688  | -0.71 | 4.8E-01 | 0 |
| Xenobiotics::Drug::ibuprofen                                                                         | 9  | 443588 | 805615  | 402078 | -0.70 | 4.8E-01 | 0 |
| Miserableness                                                                                        | 31 | 542315 | 958953  | 94404  | -0.70 | 4.8E-01 | 0 |
| Average across all tracts mean diuivities                                                            | 5  | 402258 | 466160  | 303995 | -0.69 | 4.9E-01 | 0 |
| CD4mem:%cFTH (1)                                                                                     | 1  | 321275 | 321275  | 321275 | -0.69 | 4.9E-01 | 0 |
| Medication for cholesterol, blood pressure, diabetes, or take exogenous hormones: Hormone rep        | 2  | 427943 | 450684  | 405201 | -0.69 | 4.9E-01 | 0 |
| Glycine level (female)                                                                               | 4  | 421852 | 962418  | 38242  | -0.69 | 4.9E-01 | 0 |
| Depression - Recent poor appetite or overeating                                                      | 1  | 323715 | 323715  | 323715 | -0.69 | 4.9E-01 | 0 |
| Illnesses of mother: Lung cancer                                                                     | 2  | 420399 | 620102  | 220695 | -0.68 | 4.9E-01 | 0 |
| Myeloperoxidase (at exam 7, GEE, adjusted for multivariable)                                         | 1  | 324093 | 324093  | 324093 | -0.68 | 4.9E-01 | 0 |
| Concentration of medium LDL particles                                                                | 13 | 485140 | 1055113 | 106456 | -0.68 | 5.0E-01 | 0 |
| Platelet aggregation to Epinephrine (at exam 5, GEE, adjusted for age and sex)                       | 1  | 322990 | 322990  | 322990 | -0.68 | 5.0E-01 | 0 |
| Myeloperoxidase (at exam 7, GEE, adjusted for age and sex)                                           | 1  | 324093 | 324093  | 324093 | -0.68 | 5.0E-01 | 0 |
| Worrier / anxious feelings                                                                           | 44 | 572380 | 946318  | 75698  | -0.68 | 5.0E-01 | 0 |
| Coffee type: Instant coffee                                                                          | 3  | 386028 | 710076  | 275317 | -0.68 | 5.0E-01 | 0 |
| LILRB2 - Leukocyte immunoglobulin-like receptor subfamily B member 2                                 | 1  | 326925 | 326925  | 326925 | -0.67 | 5.0E-01 | 0 |
| :::X-11315                                                                                           | 2  | 425939 | 531712  | 320167 | -0.67 | 5.0E-01 | 0 |
| Lithium response in Bipolar I patients - Alda Scale of 4 to 5                                        | 1  | 335108 | 335108  | 335108 | -0.67 | 5.0E-01 | 0 |
| IL12RB2 - Interleukin-12 receptor subunit beta-2                                                     | 1  | 334775 | 334775  | 334775 | -0.67 | 5.0E-01 | 0 |
| Cereal type: Oat cereal (e.g. Ready Brek, porridge)                                                  | 1  | 323715 | 323715  | 323715 | -0.67 | 5.0E-01 | 0 |
| Lithium response in Bipolar I patients - Alda Scale of 7 to 8                                        | 1  | 335108 | 335108  | 335108 | -0.67 | 5.1E-01 | 0 |
| Anxiety - Recent trouble relaxing                                                                    | 2  | 441872 | 653636  | 230109 | -0.67 | 5.1E-01 | 0 |
| Lithium response in Bipolar I patients - Alda Scale of 5 to 6                                        | 1  | 335108 | 335108  | 335108 | -0.67 | 5.1E-01 | 0 |
| Lithium response in Bipolar I patients - Alda Scale of 6 to 7                                        | 1  | 335108 | 335108  | 335108 | -0.66 | 5.1E-01 | 0 |
| CCL14 - C-C motif chemokine 14                                                                       | 1  | 334625 | 334625  | 334625 | -0.66 | 5.1E-01 | 0 |
| CH2 groups in fatty acids                                                                            | 3  | 385130 | 439593  | 202385 | -0.66 | 5.1E-01 | 0 |
| Insulin sensitivity index (combined influence of the genotype effect adjusted for BMI and the inter: | 11 | 472168 | 593669  | 31838  | -0.66 | 5.1E-01 | 0 |
| Left pericalcarine                                                                                   | 5  | 414180 | 721700  | 84806  | -0.66 | 5.1E-01 | 0 |
| Intercellular adhesion molecule-1 (at exam 7, GEE, adjusted for age and sex)                         | 1  | 340870 | 340870  | 340870 | -0.66 | 5.1E-01 | 0 |
| KLKB1 - Plasma kallikrein                                                                            | 2  | 444254 | 582827  | 305680 | -0.65 | 5.1E-01 | 0 |
| Left transverse temporal                                                                             | 1  | 338685 | 338685  | 338685 | -0.65 | 5.1E-01 | 0 |
| CD4:CD8 lymphocyte ratio                                                                             | 1  | 343630 | 343630  | 343630 | -0.65 | 5.1E-01 | 0 |
| KLK12 - Kallikrein-12                                                                                | 1  | 336030 | 336030  | 336030 | -0.65 | 5.1E-01 | 0 |
| Milk type used: Semi-skimmed                                                                         | 2  | 438239 | 623706  | 252773 | -0.65 | 5.2E-01 | 0 |
| CCL23 - C-C motif chemokine 23                                                                       | 1  | 334625 | 334625  | 334625 | -0.64 | 5.2E-01 | 0 |

|                                                                                |     |        |         |        |       |         |   |
|--------------------------------------------------------------------------------|-----|--------|---------|--------|-------|---------|---|
| Epithelial ovarian cancer (high -grade and low-grade serous)                   | 1   | 349565 | 349565  | 349565 | -0.64 | 5.2E-01 | 0 |
| Lipid::Lysolipid::1-arachidonoylglycerophosphoethanolamine*                    | 3   | 395798 | 858888  | 223212 | -0.64 | 5.2E-01 | 0 |
| White blood cell count                                                         | 30  | 556364 | 1138005 | 92236  | -0.64 | 5.2E-01 | 0 |
| P-selectin (at exam 7, GEE, adjusted for age and sex)                          | 2   | 439788 | 440254  | 439321 | -0.64 | 5.2E-01 | 0 |
| Amino acid::Valine, leucine and isoleucine metabolism::beta-hydroxyisovalerate | 1   | 350585 | 350585  | 350585 | -0.64 | 5.2E-01 | 0 |
| Fasting HbA1c (at exam 5, GEE, adjusted for age, sex and BMI)                  | 2   | 439373 | 610280  | 268466 | -0.64 | 5.2E-01 | 0 |
| Right paracentral                                                              | 1   | 345645 | 345645  | 345645 | -0.64 | 5.2E-01 | 0 |
| CD40 Ligand serum (at exam 7, GEE, adjusted for multivariable)                 | 2   | 447752 | 637900  | 257604 | -0.64 | 5.2E-01 | 0 |
| Age at natural menopause (GEE, adjusted for multivariable)                     | 2   | 443058 | 634202  | 251915 | -0.64 | 5.2E-01 | 0 |
| Lipid::Sterol, Steroid::epiandrosterone sulfate                                | 1   | 355103 | 355103  | 355103 | -0.64 | 5.2E-01 | 0 |
| Worrier / anxious feelings (WORRY)                                             | 35  | 562025 | 903823  | 74896  | -0.64 | 5.2E-01 | 0 |
| Intercellular adhesion molecule-1 (at exam 7, GEE, adjusted for multivariable) | 1   | 340870 | 340870  | 340870 | -0.64 | 5.2E-01 | 0 |
| Diurnal inactivity duration                                                    | 2   | 447371 | 649368  | 245374 | -0.64 | 5.3E-01 | 0 |
| FCGR3B - Low affinity immunoglobulin gamma Fc region receptor III-B            | 1   | 345368 | 345368  | 345368 | -0.63 | 5.3E-01 | 0 |
| Epithelial ovarian cancer (high-grade serous)                                  | 1   | 349565 | 349565  | 349565 | -0.63 | 5.3E-01 | 0 |
| Monocyte percentage of white cells (three-way meta)                            | 123 | 615695 | 1089181 | 85329  | -0.63 | 5.3E-01 | 0 |
| Total cholesterol in LDL                                                       | 12  | 494950 | 950535  | 86744  | -0.63 | 5.3E-01 | 0 |
| Body Mass Index (male <= 50 yrs)                                               | 6   | 456843 | 1041314 | 338085 | -0.63 | 5.3E-01 | 0 |
| Maximum carotid artery stenosis (at exam 6, GEE, adjusted for multivariable)   | 1   | 356285 | 356285  | 356285 | -0.63 | 5.3E-01 | 0 |
| ::::X-02249                                                                    | 1   | 347683 | 347683  | 347683 | -0.63 | 5.3E-01 | 0 |
| Temporal brain volume (GEE, adjusted for multivariable)                        | 1   | 354463 | 354463  | 354463 | -0.63 | 5.3E-01 | 0 |
| BPI - Bactericidal permeability-increasing protein                             | 1   | 357798 | 357798  | 357798 | -0.62 | 5.3E-01 | 0 |
| Neutrophil count                                                               | 16  | 517698 | 843389  | 89762  | -0.62 | 5.3E-01 | 0 |
| Plasma Apolipoprotein C3 level (GEE, adjusted for age and sex)                 | 1   | 368395 | 368395  | 368395 | -0.62 | 5.4E-01 | 0 |
| IL17RA - Interleukin-17 receptor A                                             | 1   | 350205 | 350205  | 350205 | -0.62 | 5.4E-01 | 0 |
| ::::X-13548                                                                    | 2   | 451773 | 501705  | 401840 | -0.62 | 5.4E-01 | 0 |
| ECE1 - Endothelin-converting enzyme 1                                          | 1   | 356988 | 356988  | 356988 | -0.61 | 5.4E-01 | 0 |
| Antihistamines for systemic use                                                | 5   | 433560 | 1317225 | 407193 | -0.61 | 5.4E-01 | 0 |
| CD40 Ligand serum (at exam 7, GEE, adjusted for age and sex)                   | 2   | 451672 | 643780  | 259564 | -0.61 | 5.4E-01 | 0 |
| PIGR - Polymeric immunoglobulin receptor                                       | 1   | 373535 | 373535  | 373535 | -0.60 | 5.5E-01 | 0 |
| Chest pain or discomfort                                                       | 2   | 460186 | 648639  | 271733 | -0.60 | 5.5E-01 | 0 |
| Thyroid stimulation hormone (at exam 4, GEE, adjusted for multivariable)       | 2   | 457443 | 564457  | 350430 | -0.60 | 5.5E-01 | 0 |
| Lipid::Essential fatty acid::eicosapentaenoate (EPA; 20:5n3)                   | 1   | 369990 | 369990  | 369990 | -0.59 | 5.5E-01 | 0 |
| Acute insulin response (adjusted for BMI)                                      | 2   | 456758 | 617763  | 295753 | -0.59 | 5.6E-01 | 0 |
| Fluid intelligence test - FI3 : word interpolation                             | 5   | 444250 | 1316713 | 183142 | -0.58 | 5.6E-01 | 0 |
| ::::X-11469                                                                    | 3   | 416563 | 544035  | 250161 | -0.58 | 5.6E-01 | 0 |
| Amino acid::Glycine, serine and threonine metabolism::serine                   | 2   | 461674 | 633210  | 290139 | -0.58 | 5.6E-01 | 0 |
| von Willebrand Factor (at exam 5, GEE, adjusted for age and sex)               | 2   | 462091 | 664765  | 259416 | -0.58 | 5.6E-01 | 0 |
| Bone Ultrasound Speed (GEE, adjusted for multivariable)                        | 1   | 370965 | 370965  | 370965 | -0.58 | 5.6E-01 | 0 |
| Hair colour (natural, before greying): Red                                     | 11  | 499715 | 898259  | 56085  | -0.58 | 5.6E-01 | 0 |
| Pancreatic cancer                                                              | 3   | 415423 | 739820  | 277350 | -0.57 | 5.7E-01 | 0 |
| Amino acid::Tryptophan metabolism::indoleacetate                               | 1   | 378023 | 378023  | 378023 | -0.57 | 5.7E-01 | 0 |
| CCL23 - Ck-beta-8-1                                                            | 1   | 389920 | 389920  | 389920 | -0.57 | 5.7E-01 | 0 |



|                                                                                              |    |        |         |        |       |         |   |
|----------------------------------------------------------------------------------------------|----|--------|---------|--------|-------|---------|---|
| Small high-density lipoprotein by NMR (at exam 4, GEE, adjusted for multivariable)           | 5  | 450625 | 918710  | 130815 | -0.57 | 5.7E-01 | 0 |
| Usual weekday bedtime (GEE)                                                                  | 2  | 474741 | 698103  | 251379 | -0.57 | 5.7E-01 | 0 |
| Medication for pain relief, constipation, heartburn: Laxatives (e.g. Dulcolax, Senokot)      | 1  | 380250 | 380250  | 380250 | -0.57 | 5.7E-01 | 0 |
| Coronary heart disease (MI, CI or CHD death, GEE, adjusted for multivariable)                | 1  | 377123 | 377123  | 377123 | -0.56 | 5.7E-01 | 0 |
| Major depressive disorder                                                                    | 3  | 421838 | 627209  | 265592 | -0.56 | 5.7E-01 | 0 |
| THBS2 - Thrombospondin-2                                                                     | 1  | 386948 | 386948  | 386948 | -0.56 | 5.8E-01 | 0 |
| Carbohydrate::Glycolysis, gluconeogenesis, pyruvate metabolism::1,5-anhydroglucitol (1,5-AG) | 3  | 427225 | 1101838 | 404371 | -0.56 | 5.8E-01 | 0 |
| Usual weekday bedtime (GEE, adjusted for age, sex and BMI)                                   | 2  | 474741 | 698103  | 251379 | -0.56 | 5.8E-01 | 0 |
| Current employment status: Unable to work because of sickness or disability                  | 1  | 390623 | 390623  | 390623 | -0.55 | 5.8E-01 | 0 |
| Left superior parietal                                                                       | 6  | 483566 | 711248  | 166031 | -0.55 | 5.8E-01 | 0 |
| Energy::Krebs cycle::succinylcarnitine                                                       | 6  | 485817 | 948119  | 96404  | -0.55 | 5.8E-01 | 0 |
| Prostate cancer (GEE, adjusted for age)                                                      | 26 | 563086 | 1018012 | 155701 | -0.55 | 5.8E-01 | 0 |
| Right rostral middle frontal                                                                 | 1  | 394190 | 394190  | 394190 | -0.55 | 5.8E-01 | 0 |
| Mother still alive                                                                           | 4  | 468654 | 992926  | 45778  | -0.54 | 5.9E-01 | 0 |
| PI3 - Elafin                                                                                 | 1  | 400733 | 400733  | 400733 | -0.54 | 5.9E-01 | 0 |
| Fornix (column and body of fornix) mode of anisotropy                                        | 2  | 487471 | 713441  | 261502 | -0.54 | 5.9E-01 | 0 |
| CLEC1B - C-type lectin domain family 1 member B                                              | 1  | 406628 | 406628  | 406628 | -0.54 | 5.9E-01 | 0 |
| Treatment/medication code: omega-3/fish oil supplement                                       | 1  | 400145 | 400145  | 400145 | -0.54 | 5.9E-01 | 0 |
| Maximum internal carotid artery IMT (at exam 6, GEE, adjusted for multivariable)             | 1  | 396293 | 396293  | 396293 | -0.54 | 5.9E-01 | 0 |
| ::::X-11204                                                                                  | 1  | 395798 | 395798  | 395798 | -0.54 | 5.9E-01 | 0 |
| Xenobiotics::Food component, Plant::N-(2-furoyl)glycine                                      | 1  | 404515 | 404515  | 404515 | -0.54 | 5.9E-01 | 0 |
| Mean internal carotid artery IMT (at exam 6, GEE, adjusted for multivariable)                | 1  | 396293 | 396293  | 396293 | -0.54 | 5.9E-01 | 0 |
| Long sleep                                                                                   | 5  | 454690 | 842328  | 380620 | -0.53 | 5.9E-01 | 0 |
| Age completed full time education                                                            | 6  | 484754 | 1301597 | 142163 | -0.53 | 5.9E-01 | 0 |
| Femoral Neck Length (GEE, adjusted for age and sex)                                          | 2  | 489545 | 524355  | 454735 | -0.53 | 6.0E-01 | 0 |
| Hearing difficulty/problems                                                                  | 25 | 560375 | 1064688 | 183421 | -0.53 | 6.0E-01 | 0 |
| Total cholesterol in medium LDL                                                              | 11 | 514640 | 831980  | 196658 | -0.53 | 6.0E-01 | 0 |
| Amino acid::Phenylalanine & tyrosine metabolism::phenylacetylglutamine                       | 1  | 410853 | 410852  | 410852 | -0.53 | 6.0E-01 | 0 |
| Amino acid::Butanoate metabolism::X-04499--3,4-dihydroxybutyrate                             | 1  | 403843 | 403843  | 403843 | -0.53 | 6.0E-01 | 0 |
| Remission after 12 weeks of antidepressant treatment in MDD                                  | 1  | 406538 | 406538  | 406538 | -0.52 | 6.0E-01 | 0 |
| Inferior fronto-occipital fasciculus axial diffusivities                                     | 4  | 473609 | 582851  | 347378 | -0.52 | 6.0E-01 | 0 |
| Brain natriuretic peptide (at exam 6, GEE, adjusted for age and sex)                         | 3  | 442838 | 845003  | 226130 | -0.52 | 6.1E-01 | 0 |
| Heart rate                                                                                   | 10 | 514051 | 1113645 | 78809  | -0.51 | 6.1E-01 | 0 |
| CHIT1 - Chitotriosidase-1                                                                    | 1  | 414468 | 414468  | 414468 | -0.51 | 6.1E-01 | 0 |
| Osteoprotegerin (at exam 7, GEE, adjusted for multivariable)                                 | 2  | 490446 | 594783  | 386109 | -0.51 | 6.1E-01 | 0 |
| CST3 - Cystatin-C                                                                            | 1  | 414238 | 414238  | 414238 | -0.51 | 6.1E-01 | 0 |
| CGA CGB - Human Chorionic Gonadotropin                                                       | 1  | 411445 | 411445  | 411445 | -0.51 | 6.1E-01 | 0 |
| Osteoarthritis                                                                               | 29 | 568683 | 1044870 | 210350 | -0.51 | 6.1E-01 | 0 |
| Phospholipids in large LDL                                                                   | 11 | 521590 | 1009733 | 240700 | -0.51 | 6.1E-01 | 0 |
| Lipid::Sterol/Steroid::X-11445--5-alpha-pregnan-3beta,20alpha-disulfate                      | 1  | 416563 | 416563  | 416563 | -0.50 | 6.2E-01 | 0 |
| Epithelial ovarian cancer (Clear cell)                                                       | 1  | 422213 | 422213  | 422213 | -0.49 | 6.2E-01 | 0 |
| Diagnoses - secondary ICD10: Z37 Outcome of delivery                                         | 2  | 495450 | 726366  | 264534 | -0.49 | 6.2E-01 | 0 |
| Monocyte chemotactic protein-1 (CCL2)                                                        | 2  | 500645 | 736100  | 265190 | -0.49 | 6.2E-01 | 0 |

|                                                                                                 |    |        |         |        |       |         |   |
|-------------------------------------------------------------------------------------------------|----|--------|---------|--------|-------|---------|---|
| Alanine transaminase (at exam 2, GEE, adjusted for multivariable)                               | 1  | 419925 | 419925  | 419925 | -0.49 | 6.2E-01 | 0 |
| Splenium of corpus callosum mean diuivities                                                     | 2  | 499750 | 597628  | 401873 | -0.49 | 6.2E-01 | 0 |
| High-density lipoprotein 3 cholesterol (at exam 4, GEE, adjusted for multivariable)             | 3  | 451013 | 479461  | 245010 | -0.49 | 6.3E-01 | 0 |
| How are people in household related to participant: Son and/or daughter (include step-children) | 1  | 419693 | 419693  | 419693 | -0.49 | 6.3E-01 | 0 |
| ....X-12524                                                                                     | 1  | 424935 | 424935  | 424935 | -0.49 | 6.3E-01 | 0 |
| ....X-13429                                                                                     | 1  | 426800 | 426800  | 426800 | -0.49 | 6.3E-01 | 0 |
| Variation in diet                                                                               | 10 | 520368 | 1001284 | 204209 | -0.48 | 6.3E-01 | 0 |
| Cingulum (cingulate gyrus) mode of anisotropy                                                   | 5  | 475135 | 875192  | 49476  | -0.48 | 6.3E-01 | 0 |
| Colorectal cancer                                                                               | 9  | 507910 | 1064808 | 338440 | -0.48 | 6.3E-01 | 0 |
| Ever used hormone-replacement therapy (HRT) (female)                                            | 5  | 475463 | 1105553 | 66235  | -0.48 | 6.3E-01 | 0 |
| Male-specific factors - Hair/balding pattern: Pattern 2                                         | 45 | 597060 | 1010020 | 217307 | -0.48 | 6.3E-01 | 0 |
| Cholesterol esters in medium LDL                                                                | 14 | 544955 | 1053568 | 173578 | -0.48 | 6.3E-01 | 0 |
| Obesity class 2                                                                                 | 10 | 526273 | 640331  | 283569 | -0.48 | 6.3E-01 | 0 |
| Posterior thalamic radiation (include optic radiation) mean diuivities                          | 2  | 499750 | 597628  | 401873 | -0.48 | 6.3E-01 | 0 |
| ....X-14626                                                                                     | 1  | 426800 | 426800  | 426800 | -0.48 | 6.3E-01 | 0 |
| Total brain volume                                                                              | 8  | 512325 | 1109881 | 224513 | -0.48 | 6.3E-01 | 0 |
| Fluid intelligence test - F16 : conditional arithmetic                                          | 1  | 428080 | 428080  | 428080 | -0.47 | 6.4E-01 | 0 |
| Numeric memory test - Maximum digits remembered correctly                                       | 6  | 509016 | 1608511 | 62861  | -0.47 | 6.4E-01 | 0 |
| Lipid::Fatty acid, dicarboxylate::tetradecanedioate                                             | 1  | 426800 | 426800  | 426800 | -0.47 | 6.4E-01 | 0 |
| Frequency of stair climbing in last 4 weeks                                                     | 6  | 504911 | 915942  | 413849 | -0.47 | 6.4E-01 | 0 |
| Number of children ever born (male)                                                             | 1  | 432875 | 432875  | 432875 | -0.47 | 6.4E-01 | 0 |
| Mean Arterial Pressure                                                                          | 14 | 540890 | 934514  | 272220 | -0.47 | 6.4E-01 | 0 |
| Posterior thalamic radiation (include optic radiation) radial diuivities                        | 2  | 499750 | 597628  | 401873 | -0.47 | 6.4E-01 | 0 |
| Superior longitudinal fasciculus fractional anisotropy                                          | 4  | 498528 | 751069  | 233972 | -0.47 | 6.4E-01 | 0 |
| Waist circumference by CT (GEE, adjusted for age and sex)                                       | 2  | 505384 | 737206  | 273563 | -0.47 | 6.4E-01 | 0 |
| Usual walking pace                                                                              | 40 | 598774 | 1174531 | 130097 | -0.47 | 6.4E-01 | 0 |
| Duration of moderate activity                                                                   | 5  | 487838 | 856333  | 432443 | -0.47 | 6.4E-01 | 0 |
| Had menopause (female)                                                                          | 28 | 580544 | 1140433 | 109921 | -0.47 | 6.4E-01 | 0 |
| Fasting proinsulin (adjusted for fasting insulin, age and sex)                                  | 7  | 499810 | 935071  | 285636 | -0.47 | 6.4E-01 | 0 |
| Temporal brain volume (GEE, adjusted for age and sex)                                           | 2  | 503445 | 577936  | 428954 | -0.46 | 6.4E-01 | 0 |
| Lipid::Essential fatty acid::docosapentaenoate (n3 DPA; 22:5n3)                                 | 1  | 439805 | 439805  | 439805 | -0.46 | 6.4E-01 | 0 |
| Peptide::gamma-glutamyl::gamma-glutamylphenylalanine                                            | 1  | 436478 | 436477  | 436477 | -0.46 | 6.5E-01 | 0 |
| CCL18 - C-C motif chemokine 18                                                                  | 1  | 451863 | 451863  | 451863 | -0.45 | 6.5E-01 | 0 |
| Waist circumference by CT (GEE, adjusted for age, sex, smoking and menopause)                   | 2  | 505384 | 737206  | 273563 | -0.45 | 6.5E-01 | 0 |
| PPIE - Peptidyl-prolyl cis-trans isomerase E                                                    | 1  | 445040 | 445040  | 445040 | -0.45 | 6.5E-01 | 0 |
| Temporal horn volume (GEE, adjusted for age and sex)                                            | 1  | 437120 | 437120  | 437120 | -0.45 | 6.5E-01 | 0 |
| Lumbar Spine BMD (GEE, adjusted for multivariable)                                              | 2  | 507674 | 743521  | 271828 | -0.45 | 6.5E-01 | 0 |
| NTN4 - Netrin-4                                                                                 | 1  | 455813 | 455813  | 455813 | -0.45 | 6.6E-01 | 0 |
| Osteoarthritis of knee                                                                          | 8  | 526686 | 1263233 | 396324 | -0.44 | 6.6E-01 | 0 |
| Diabetes (diagnosed by doctor)                                                                  | 54 | 615524 | 1079431 | 158394 | -0.44 | 6.6E-01 | 0 |
| Positive affect (univariate)                                                                    | 8  | 523256 | 1148566 | 94318  | -0.44 | 6.6E-01 | 0 |
| ....X-11381                                                                                     | 1  | 448098 | 448098  | 448098 | -0.44 | 6.6E-01 | 0 |
| Dysmenorrhea pain severity                                                                      | 2  | 514651 | 746114  | 283188 | -0.44 | 6.6E-01 | 0 |

|                                                                              |     |        |         |        |       |         |   |
|------------------------------------------------------------------------------|-----|--------|---------|--------|-------|---------|---|
| Erectile dysfunction                                                         | 1   | 453883 | 453883  | 453883 | -0.43 | 6.6E-01 | 0 |
| CCL3 - C-C motif chemokine 3                                                 | 1   | 451863 | 451863  | 451863 | -0.43 | 6.6E-01 | 0 |
| Total IgA levels                                                             | 1   | 456193 | 456193  | 456193 | -0.43 | 6.7E-01 | 0 |
| External capsule axial diuivities                                            | 1   | 466160 | 466160  | 466160 | -0.43 | 6.7E-01 | 0 |
| CCL3L1 - C-C motif chemokine 3-like 1                                        | 1   | 451863 | 451863  | 451863 | -0.43 | 6.7E-01 | 0 |
| Ever had hysterectomy (womb removed) (female)                                | 2   | 524988 | 765437  | 284540 | -0.43 | 6.7E-01 | 0 |
| Maximum common carotid artery IMT (at exam 6, GEE, adjusted for age and sex) | 3   | 481390 | 683709  | 334883 | -0.42 | 6.7E-01 | 0 |
| Average across all tracts radial diuivities                                  | 4   | 516526 | 761518  | 243521 | -0.42 | 6.7E-01 | 0 |
| Fatty acid length                                                            | 1   | 459733 | 459733  | 459733 | -0.42 | 6.8E-01 | 0 |
| ApoB                                                                         | 14  | 554768 | 970919  | 173578 | -0.41 | 6.8E-01 | 0 |
| Urinary isoprostanes/creatinine (at exam 7, GEE, adjusted for age and sex)   | 3   | 487203 | 581389  | 259864 | -0.41 | 6.8E-01 | 0 |
| Mineral and other dietary supplements: Zinc                                  | 1   | 472285 | 472285  | 472285 | -0.40 | 6.9E-01 | 0 |
| Genu of corpus callosum mean diuivities                                      | 5   | 504515 | 740255  | 303995 | -0.40 | 6.9E-01 | 0 |
| Eosinophil count                                                             | 13  | 550998 | 954342  | 96751  | -0.40 | 6.9E-01 | 0 |
| Age last used hormone-replacement therapy (HRT) (female)                     | 1   | 473425 | 473425  | 473425 | -0.40 | 6.9E-01 | 0 |
| IL18RAP - Interleukin-18 receptor accessory protein                          | 1   | 474333 | 474333  | 474333 | -0.40 | 6.9E-01 | 0 |
| Overweight                                                                   | 13  | 555613 | 992923  | 323375 | -0.39 | 6.9E-01 | 0 |
| Body Mass Index (female <= 50 yrs)                                           | 18  | 574599 | 1202961 | 192863 | -0.39 | 7.0E-01 | 0 |
| Lipid::Fatty acid, dicarboxylate::hexadecanedioate                           | 1   | 482085 | 482085  | 482085 | -0.39 | 7.0E-01 | 0 |
| Right lateral ventricle                                                      | 12  | 558718 | 912548  | 195172 | -0.39 | 7.0E-01 | 0 |
| Hippocampal volume (GEE, adjusted for multivariable with APOE)               | 2   | 538554 | 599521  | 477587 | -0.38 | 7.0E-01 | 0 |
| Fasting glucose interaction (adjusted for BMI)                               | 6   | 533355 | 751131  | 516461 | -0.38 | 7.0E-01 | 0 |
| SPINT1 - Kunitz-type protease inhibitor 1                                    | 1   | 483008 | 483008  | 483008 | -0.38 | 7.1E-01 | 0 |
| MED1 - Mediator of RNA polymerase II transcription subunit 1                 | 1   | 484898 | 484898  | 484898 | -0.38 | 7.1E-01 | 0 |
| Freckles                                                                     | 4   | 530375 | 666042  | 333886 | -0.38 | 7.1E-01 | 0 |
| Reticulocyte fraction of red cells (three-way meta)                          | 114 | 637324 | 1092624 | 113725 | -0.38 | 7.1E-01 | 0 |
| Fasting glucose                                                              | 15  | 564913 | 974776  | 167229 | -0.38 | 7.1E-01 | 0 |
| ::::X-11538                                                                  | 1   | 482085 | 482085  | 482085 | -0.37 | 7.1E-01 | 0 |
| Ankle-brachial index (at exam 7, GEE, adjusted for age and sex)              | 2   | 547524 | 551768  | 543279 | -0.37 | 7.1E-01 | 0 |
| Total cholesterol in large LDL                                               | 12  | 563180 | 1090583 | 307823 | -0.37 | 7.1E-01 | 0 |
| Right precentral                                                             | 5   | 526250 | 875192  | 29254  | -0.36 | 7.2E-01 | 0 |
| MYCN amplification neuroblastoma                                             | 2   | 547140 | 798676  | 295603 | -0.36 | 7.2E-01 | 0 |
| Interleukin-7                                                                | 1   | 496443 | 496443  | 496443 | -0.36 | 7.2E-01 | 0 |
| Alcohol consumption (dichotomous)                                            | 1   | 492088 | 492088  | 492088 | -0.35 | 7.2E-01 | 0 |
| How are people in household related to participant: Husband, wife or partner | 1   | 490698 | 490698  | 490698 | -0.35 | 7.2E-01 | 0 |
| Prothrombin time                                                             | 8   | 554565 | 1070068 | 373716 | -0.35 | 7.2E-01 | 0 |
| Left amygdala                                                                | 4   | 536671 | 727938  | 276053 | -0.35 | 7.3E-01 | 0 |
| Blood sugar                                                                  | 15  | 569313 | 907016  | 90606  | -0.35 | 7.3E-01 | 0 |
| CAPN1 CAPNS1 - Calpain I                                                     | 1   | 495535 | 495535  | 495535 | -0.35 | 7.3E-01 | 0 |
| Waist-hip ratio (male > 50 yrs, adjusted for BMI)                            | 3   | 514313 | 794198  | 286605 | -0.35 | 7.3E-01 | 0 |
| LAG3 - Lymphocyte activation gene 3 protein                                  | 1   | 495908 | 495908  | 495908 | -0.34 | 7.3E-01 | 0 |
| Immature fraction of reticulocytes (two-way meta)                            | 80  | 634590 | 1058338 | 111568 | -0.34 | 7.3E-01 | 0 |
| Chronotype (continuous)                                                      | 5   | 532973 | 965650  | 130692 | -0.34 | 7.3E-01 | 0 |

|                                                                                                       |     |        |         |        |       |         |   |
|-------------------------------------------------------------------------------------------------------|-----|--------|---------|--------|-------|---------|---|
| CCL8 - C-C motif chemokine 8                                                                          | 2   | 558481 | 710851  | 406112 | -0.34 | 7.3E-01 | 0 |
| Genu of corpus callosum mode of anisotropy                                                            | 1   | 491515 | 491515  | 491515 | -0.34 | 7.4E-01 | 0 |
| Right superior parietal                                                                               | 4   | 540659 | 764921  | 498629 | -0.34 | 7.4E-01 | 0 |
| Remnant lipoprotein triglycerides (at exam 4, GEE, adjusted for age and sex)                          | 2   | 560877 | 802005  | 319749 | -0.33 | 7.4E-01 | 0 |
| CD32 on 11c+123+DC                                                                                    | 1   | 508515 | 508515  | 508515 | -0.33 | 7.4E-01 | 0 |
| Reason for glasses/contact lenses: For short-sightedness, i.e. only or mainly for distance viewing    | 38  | 614573 | 1209086 | 284724 | -0.33 | 7.4E-01 | 0 |
| Interleukin-18                                                                                        | 2   | 551358 | 818120  | 284595 | -0.33 | 7.4E-01 | 0 |
| Cancer register - Histology of cancer tumour: Adenocarcinoma, NOS                                     | 10  | 565555 | 852391  | 77790  | -0.33 | 7.4E-01 | 0 |
| High-density lipoprotein 2 cholesterol (at exam 4, GEE, adjusted for age and sex)                     | 2   | 565986 | 579462  | 552511 | -0.33 | 7.4E-01 | 0 |
| CFI - Complement factor I                                                                             | 1   | 511358 | 511358  | 511358 | -0.33 | 7.5E-01 | 0 |
| Duration of light DIY                                                                                 | 2   | 560493 | 578058  | 542928 | -0.32 | 7.5E-01 | 0 |
| Atrial natriuretic peptide (at exam 6, GEE, adjusted for age and sex)                                 | 1   | 511103 | 511102  | 511102 | -0.32 | 7.5E-01 | 0 |
| Amino acid::Glutathione metabolism::cysteine-glutathione disulfide                                    | 1   | 506408 | 506408  | 506408 | -0.32 | 7.5E-01 | 0 |
| Cheese intake                                                                                         | 77  | 636550 | 1104145 | 87946  | -0.32 | 7.5E-01 | 0 |
| Friendships satisfaction                                                                              | 3   | 524345 | 856514  | 474481 | -0.32 | 7.5E-01 | 0 |
| QT interval                                                                                           | 10  | 572545 | 862658  | 175184 | -0.31 | 7.6E-01 | 0 |
| Drinks per week                                                                                       | 47  | 624858 | 1257091 | 61640  | -0.31 | 7.6E-01 | 0 |
| Chloride                                                                                              | 14  | 582996 | 1098427 | 54292  | -0.31 | 7.6E-01 | 0 |
| White matter hyperintensities                                                                         | 3   | 528005 | 810336  | 416841 | -0.31 | 7.6E-01 | 0 |
| Total body BMD (15 or younger)                                                                        | 7   | 551500 | 1039185 | 244137 | -0.31 | 7.6E-01 | 0 |
| Eosinophil count (three-way meta)                                                                     | 117 | 645863 | 1069568 | 84423  | -0.30 | 7.6E-01 | 0 |
| Cerebellar vermal lobules VI VII                                                                      | 12  | 576470 | 843186  | 185615 | -0.30 | 7.6E-01 | 0 |
| Menstrual cycle length                                                                                | 5   | 544048 | 1117228 | 78471  | -0.30 | 7.6E-01 | 0 |
| CDON - Cell adhesion molecule-related/down-regulated by oncogenes                                     | 1   | 524285 | 524285  | 524285 | -0.29 | 7.7E-01 | 0 |
| CD4:%RTE                                                                                              | 1   | 524605 | 524605  | 524605 | -0.29 | 7.7E-01 | 0 |
| ::::X-11550                                                                                           | 1   | 527550 | 527550  | 527550 | -0.29 | 7.7E-01 | 0 |
| Vitamin K percentage of undercarboxylated osteocalcin (at exam 6 or 7, GEE, adjusted for age and sex) | 9   | 568983 | 576395  | 430827 | -0.29 | 7.7E-01 | 0 |
| Vitamin K plasma phylloquinone (at exam 6 or 7, GEE, adjusted for age and sex)                        | 2   | 579233 | 829539  | 328927 | -0.29 | 7.7E-01 | 0 |
| Anterior limb of internal capsule radial diffusivities                                                | 2   | 575501 | 835419  | 315582 | -0.29 | 7.7E-01 | 0 |
| Monocyte count (three-way meta)                                                                       | 134 | 648628 | 1093106 | 97777  | -0.29 | 7.7E-01 | 0 |
| Age at first live birth (female)                                                                      | 15  | 590413 | 1089984 | 109928 | -0.28 | 7.8E-01 | 0 |
| Asthma, hay fever or eczema                                                                           | 58  | 633619 | 1197049 | 220662 | -0.28 | 7.8E-01 | 0 |
| Subcutaneous adipose tissue attenuation (male)                                                        | 1   | 544410 | 544410  | 544410 | -0.28 | 7.8E-01 | 0 |
| Cingulum (cingulate gyrus) axial diffusivities                                                        | 4   | 557716 | 710658  | 368659 | -0.28 | 7.8E-01 | 0 |
| Inferior fronto-occipital fasciculus mean diffusivities                                               | 2   | 573296 | 633178  | 513414 | -0.28 | 7.8E-01 | 0 |
| ::::X-12456                                                                                           | 2   | 576224 | 839023  | 313425 | -0.28 | 7.8E-01 | 0 |
| Total lipids in small LDL                                                                             | 12  | 589284 | 1089553 | 296573 | -0.28 | 7.8E-01 | 0 |
| Posterior limb of internal capsule axial diffusivities                                                | 6   | 562368 | 1140271 | 372944 | -0.28 | 7.8E-01 | 0 |
| HOMA-IR (at exam 7, GEE, adjusted for age and sex)                                                    | 1   | 545980 | 545980  | 545980 | -0.27 | 7.8E-01 | 0 |
| Menstrual fever                                                                                       | 1   | 548240 | 548240  | 548240 | -0.27 | 7.9E-01 | 0 |
| Sleep duration (mean)                                                                                 | 7   | 568635 | 664266  | 43752  | -0.27 | 7.9E-01 | 0 |
| Vitiligo (late onset)                                                                                 | 5   | 559010 | 665375  | 86496  | -0.27 | 7.9E-01 | 0 |
| Total cholesterol in HDL                                                                              | 11  | 586548 | 1042579 | 74752  | -0.27 | 7.9E-01 | 0 |

|                                                                                                 |     |        |         |        |       |         |   |
|-------------------------------------------------------------------------------------------------|-----|--------|---------|--------|-------|---------|---|
| Fasting insulin (at exam 7, GEE, adjusted for age and sex)                                      | 1   | 545980 | 545980  | 545980 | -0.26 | 8.0E-01 | 0 |
| F11 - Coagulation Factor XI                                                                     | 2   | 582585 | 651993  | 513178 | -0.25 | 8.0E-01 | 0 |
| Amino acid::Tryptophan metabolism::X-12100--hydroxytryptophan*                                  | 3   | 552740 | 987160  | 508206 | -0.25 | 8.0E-01 | 0 |
| NID2 - Nidogen-2                                                                                | 1   | 556970 | 556970  | 556970 | -0.25 | 8.0E-01 | 0 |
| Peptide::Dipeptide::pro-hydroxy-pro                                                             | 1   | 551180 | 551180  | 551180 | -0.25 | 8.0E-01 | 0 |
| Types of physical activity in last 4 weeks: Light DIY (eg: pruning, watering the lawn)          | 5   | 564225 | 842960  | 76649  | -0.25 | 8.0E-01 | 0 |
| Openness to Experience (NEO-FFI)                                                                | 1   | 550570 | 550570  | 550570 | -0.25 | 8.0E-01 | 0 |
| Double bonds in fatty acids                                                                     | 3   | 548893 | 713123  | 521474 | -0.25 | 8.0E-01 | 0 |
| Relative age of first facial hair (male)                                                        | 78  | 641573 | 1085894 | 148743 | -0.25 | 8.0E-01 | 0 |
| F7 - Coagulation Factor VII                                                                     | 2   | 591532 | 795001  | 388063 | -0.25 | 8.0E-01 | 0 |
| Low-density-lipoprotein cholesterol                                                             | 16  | 605781 | 972744  | 319617 | -0.25 | 8.0E-01 | 0 |
| Vitamin K percentage of undercarboxylated osteocalcin (at exam 6 or 7, GEE, adjusted for multiv | 6   | 579429 | 710328  | 550473 | -0.25 | 8.0E-01 | 0 |
| CD34 on Stem                                                                                    | 2   | 585721 | 747239  | 424203 | -0.25 | 8.0E-01 | 0 |
| PRSS3 - Trypsin-3                                                                               | 1   | 554135 | 554135  | 554135 | -0.25 | 8.0E-01 | 0 |
| Cingulum (cingulate gyrus) radial diuivities                                                    | 2   | 589824 | 732738  | 446909 | -0.25 | 8.1E-01 | 0 |
| Types of transport used (excluding work): Walk                                                  | 7   | 572478 | 1078124 | 475506 | -0.25 | 8.1E-01 | 0 |
| CCL17 - C-C motif chemokine 17                                                                  | 3   | 563553 | 799484  | 296644 | -0.24 | 8.1E-01 | 0 |
| Reaction time                                                                                   | 39  | 627113 | 991665  | 187568 | -0.24 | 8.1E-01 | 0 |
| MMSE score (at age 65, GEE, adjusted for birth-cohort)                                          | 2   | 592761 | 814936  | 370587 | -0.24 | 8.1E-01 | 0 |
| Cholesterol esters in very large HDL                                                            | 7   | 576970 | 924116  | 300392 | -0.24 | 8.1E-01 | 0 |
| Reason for reducing amount of alcohol drunk: Other reason                                       | 2   | 594386 | 865441  | 323332 | -0.23 | 8.1E-01 | 0 |
| Blood urea nitrogen                                                                             | 160 | 655081 | 1009751 | 162559 | -0.23 | 8.2E-01 | 0 |
| Body Mass Index (female > 50 yrs)                                                               | 16  | 610561 | 831621  | 266421 | -0.23 | 8.2E-01 | 0 |
| Non-cancer illness code, self-reported: diabetes                                                | 35  | 631385 | 1039403 | 127300 | -0.23 | 8.2E-01 | 0 |
| Suffer from 'nerves'                                                                            | 9   | 586548 | 1331945 | 79348  | -0.23 | 8.2E-01 | 0 |
| High-density lipoprotein cholesterol (at exam 3, GEE, adjusted for age and sex)                 | 1   | 553705 | 553705  | 553705 | -0.23 | 8.2E-01 | 0 |
| Total cerebral brain volume (GEE, adjusted for age and sex)                                     | 2   | 602395 | 802206  | 402583 | -0.22 | 8.2E-01 | 0 |
| Overall activity (conditioning sex and BMI)                                                     | 2   | 596295 | 876853  | 315738 | -0.22 | 8.2E-01 | 0 |
| Periodontal complex trait 4                                                                     | 1   | 570673 | 570673  | 570673 | -0.22 | 8.3E-01 | 0 |
| ITGA1 ITGB1 - Integrin alpha-I: beta-1 complex                                                  | 1   | 573303 | 573303  | 573303 | -0.22 | 8.3E-01 | 0 |
| Age spot                                                                                        | 2   | 604110 | 693733  | 514487 | -0.22 | 8.3E-01 | 0 |
| Body Mass Index (male > 50 yrs)                                                                 | 18  | 614885 | 947845  | 132192 | -0.21 | 8.3E-01 | 0 |
| Mitral annular calcification                                                                    | 1   | 579550 | 579550  | 579550 | -0.21 | 8.3E-01 | 0 |
| Triglycerides (at exam 2, GEE, adjusted for age and sex)                                        | 1   | 570958 | 570958  | 570958 | -0.21 | 8.3E-01 | 0 |
| Verbal-numerical reasoning                                                                      | 27  | 625013 | 1025048 | 106612 | -0.21 | 8.3E-01 | 0 |
| Concentration of small LDL particles                                                            | 8   | 589284 | 877694  | 382584 | -0.21 | 8.3E-01 | 0 |
| HIPK3 - Homeodomain-interacting protein kinase 3                                                | 1   | 562288 | 562288  | 562288 | -0.21 | 8.3E-01 | 0 |
| Visceral fat by CT (GEE, adjusted for age and sex)                                              | 2   | 600713 | 867063  | 334363 | -0.21 | 8.3E-01 | 0 |
| Average across all tracts mode of anisotropy                                                    | 2   | 597093 | 793964  | 400222 | -0.21 | 8.4E-01 | 0 |
| Non-cancer illness code, self-reported: angina                                                  | 13  | 607173 | 911330  | 151638 | -0.21 | 8.4E-01 | 0 |
| Non-cancer illness code, self-reported: hayfever/allergic rhinitis                              | 13  | 604133 | 1105033 | 240679 | -0.21 | 8.4E-01 | 0 |
| Age at natural menopause (GEE)                                                                  | 2   | 610135 | 672518  | 547753 | -0.20 | 8.4E-01 | 0 |
| Corrected insulin response (adjusted for insulin sensitivity index)                             | 2   | 608554 | 845457  | 371651 | -0.20 | 8.4E-01 | 0 |

|                                                                                              |    |        |         |        |       |         |   |
|----------------------------------------------------------------------------------------------|----|--------|---------|--------|-------|---------|---|
| Visceral fat by CT (GEE, adjusted for age, sex, smoking, menopause)                          | 2  | 600713 | 867063  | 334363 | -0.20 | 8.4E-01 | 0 |
| Types of transport used (excluding work): Car/motor vehicle                                  | 1  | 579423 | 579423  | 579423 | -0.20 | 8.5E-01 | 0 |
| Cholesterol esters in large LDL                                                              | 13 | 604770 | 1055113 | 374945 | -0.19 | 8.5E-01 | 0 |
| Aspartate aminotransferase                                                                   | 20 | 619345 | 1047219 | 48244  | -0.19 | 8.5E-01 | 0 |
| Concentration of medium HDL particles                                                        | 3  | 586548 | 984386  | 328255 | -0.19 | 8.5E-01 | 0 |
| SEMA3E - Semaphorin-3E                                                                       | 1  | 578428 | 578428  | 578428 | -0.19 | 8.5E-01 | 0 |
| Average across all tracts axial diuivities                                                   | 4  | 597609 | 837311  | 460609 | -0.19 | 8.5E-01 | 0 |
| Mean triglycerides from exam 1-7 (GEE, adjusted for multivariable)                           | 2  | 615177 | 804173  | 426180 | -0.19 | 8.5E-01 | 0 |
| Mean triglycerides from exam 1-7 (GEE, adjusted for age and sex)                             | 2  | 615177 | 804173  | 426180 | -0.18 | 8.5E-01 | 0 |
| Lipoprotein A (at exam 3, GEE, adjusted for multivariable)                                   | 14 | 613269 | 1136285 | 107248 | -0.18 | 8.5E-01 | 0 |
| JAG1 - Protein jagged-1                                                                      | 2  | 619229 | 650998  | 587459 | -0.18 | 8.6E-01 | 0 |
| Overall health rating                                                                        | 47 | 643415 | 1153283 | 125768 | -0.18 | 8.6E-01 | 0 |
| Focal Epilepsy, hippocampal sclerosis (HS)                                                   | 2  | 614200 | 817980  | 410421 | -0.18 | 8.6E-01 | 0 |
| Total cholesterol in small LDL                                                               | 9  | 604770 | 941313  | 385130 | -0.18 | 8.6E-01 | 0 |
| Number of self-reported cancers                                                              | 7  | 597025 | 744341  | 321497 | -0.18 | 8.6E-01 | 0 |
| Broad depression                                                                             | 7  | 593940 | 769674  | 481033 | -0.17 | 8.6E-01 | 0 |
| Life span                                                                                    | 2  | 615808 | 891731  | 339884 | -0.17 | 8.6E-01 | 0 |
| Coffee intake                                                                                | 22 | 626030 | 1211758 | 75279  | -0.17 | 8.6E-01 | 0 |
| ROR1 - Tyrosine-protein kinase transmembrane receptor ROR1                                   | 1  | 583968 | 583968  | 583968 | -0.17 | 8.6E-01 | 0 |
| PDCD1LG2 - Programmed cell death 1 ligand 2                                                  | 1  | 588338 | 588338  | 588338 | -0.17 | 8.6E-01 | 0 |
| 28 year time-averaged Fasting plasma glucose (GEE, adjusted for age, sex and BMI)            | 8  | 599569 | 935993  | 113052 | -0.17 | 8.6E-01 | 0 |
| Waist-hip ratio (male <= 50 yrs, adjusted for BMI)                                           | 1  | 592133 | 592133  | 592133 | -0.17 | 8.7E-01 | 0 |
| Cofactors and vitamins::Hemoglobin and porphyrin metabolism::biliverdin                      | 1  | 600395 | 600395  | 600395 | -0.17 | 8.7E-01 | 0 |
| Low-density lipoprotein cholesterol (at exam 4, GEE, adjusted for age and sex)               | 3  | 588370 | 945861  | 314979 | -0.17 | 8.7E-01 | 0 |
| Treatment/medication code: ventolin 100micrograms inhaler                                    | 12 | 618721 | 860567  | 281457 | -0.16 | 8.7E-01 | 0 |
| Occipital brain volume (GEE, adjusted for multivariable)                                     | 1  | 597905 | 597905  | 597905 | -0.16 | 8.7E-01 | 0 |
| Mean low-density lipoprotein cholesterol fromexam 1-7 (GEE, adjusted for age and sex)        | 3  | 588370 | 836973  | 308513 | -0.16 | 8.7E-01 | 0 |
| Cofactors and vitamins::Hemoglobin and porphyrin metabolism::bilirubin (Z,Z)                 | 1  | 600395 | 600395  | 600395 | -0.16 | 8.7E-01 | 0 |
| Cofactors and vitamins::Hemoglobin and porphyrin metabolism::bilirubin (E,Z or Z,E)*         | 1  | 600395 | 600395  | 600395 | -0.16 | 8.7E-01 | 0 |
| Activated partial thromboplastin time                                                        | 6  | 603606 | 912434  | 153682 | -0.16 | 8.7E-01 | 0 |
| Fasting plasma glucose (at exam 5, GEE, adjusted for age and sex)                            | 3  | 585880 | 744233  | 345087 | -0.16 | 8.7E-01 | 0 |
| Occipital brain volume (GEE, adjusted for age and sex)                                       | 1  | 597905 | 597905  | 597905 | -0.16 | 8.8E-01 | 0 |
| Residual from predicted FEF25-75/FVC for latest exam (GEE, adjusted for multiple covariates) | 4  | 603766 | 803601  | 561251 | -0.15 | 8.8E-01 | 0 |
| Total cholesterol in very large HDL                                                          | 8  | 606231 | 1088621 | 528099 | -0.15 | 8.8E-01 | 0 |
| ApoA1                                                                                        | 6  | 606613 | 1066224 | 196449 | -0.15 | 8.8E-01 | 0 |
| Total lipids in medium HDL                                                                   | 3  | 586548 | 984386  | 328255 | -0.15 | 8.8E-01 | 0 |
| Drive faster than motorway speed limit                                                       | 21 | 634753 | 988613  | 213280 | -0.15 | 8.8E-01 | 0 |
| Years since last cervical smear test (female)                                                | 6  | 603016 | 805232  | 178825 | -0.15 | 8.8E-01 | 0 |
| Cofactors and vitamins::Hemoglobin and porphyrin metabolism::X-11793--oxidized bilirubin*    | 1  | 600395 | 600395  | 600395 | -0.15 | 8.8E-01 | 0 |
| Corticospinal tract mode of anisotropy                                                       | 1  | 604068 | 604068  | 604068 | -0.15 | 8.8E-01 | 0 |
| :::X-11530                                                                                   | 1  | 600395 | 600395  | 600395 | -0.15 | 8.8E-01 | 0 |
| SELL - L-Selectin                                                                            | 1  | 608283 | 608283  | 608283 | -0.14 | 8.9E-01 | 0 |
| Cofactors and vitamins::Hemoglobin and porphyrin metabolism::bilirubin (E,E)*                | 1  | 600395 | 600395  | 600395 | -0.14 | 8.9E-01 | 0 |

|                                                                                                           |     |        |         |        |       |         |   |
|-----------------------------------------------------------------------------------------------------------|-----|--------|---------|--------|-------|---------|---|
| ....X-13215                                                                                               | 1   | 603415 | 603415  | 603415 | -0.14 | 8.9E-01 | 0 |
| Phosphorus                                                                                                | 6   | 606580 | 927589  | 355484 | -0.14 | 8.9E-01 | 0 |
| Diagnoses - secondary ICD10: Z85 Personal history of malignant neoplasm                                   | 1   | 609465 | 609465  | 609465 | -0.14 | 8.9E-01 | 0 |
| Lipid::Carnitine metabolism::cis-4-decenoyl carnitine                                                     | 2   | 625054 | 894417  | 355691 | -0.14 | 8.9E-01 | 0 |
| Concentration of chylomicrons and extremely large VLDL particles                                          | 7   | 614910 | 976125  | 340115 | -0.14 | 8.9E-01 | 0 |
| D-dimer (at exam 6, GEE, adjusted for multivariable)                                                      | 2   | 631283 | 758655  | 503910 | -0.14 | 8.9E-01 | 0 |
| Left postcentral                                                                                          | 6   | 617603 | 665156  | 322343 | -0.13 | 9.0E-01 | 0 |
| Right thalamus proper                                                                                     | 4   | 613213 | 1213465 | 51112  | -0.13 | 9.0E-01 | 0 |
| Multiple Sclerosis                                                                                        | 18  | 636436 | 1019228 | 117572 | -0.13 | 9.0E-01 | 0 |
| IL15RA - Interleukin-15 receptor subunit alpha                                                            | 1   | 622523 | 622523  | 622523 | -0.12 | 9.0E-01 | 0 |
| Treatment/medication code: bendroflumethiazide                                                            | 16  | 632978 | 1072324 | 142796 | -0.12 | 9.0E-01 | 0 |
| Eosinophil percentage of granulocytes (two-way meta)                                                      | 97  | 660213 | 1131560 | 141814 | -0.12 | 9.0E-01 | 0 |
| B:%Mature                                                                                                 | 1   | 617010 | 617010  | 617010 | -0.12 | 9.0E-01 | 0 |
| ....X-11440                                                                                               | 1   | 622075 | 622075  | 622075 | -0.12 | 9.0E-01 | 0 |
| Alcohol dependency (full discovery samples)                                                               | 1   | 620200 | 620200  | 620200 | -0.12 | 9.0E-01 | 0 |
| Neutrophil percentage of granulocytes (two-way meta)                                                      | 95  | 660213 | 1132070 | 178427 | -0.11 | 9.1E-01 | 0 |
| Diagnoses - main ICD10: M17 Osteoarthritis of knee                                                        | 3   | 614298 | 1249150 | 476524 | -0.11 | 9.1E-01 | 0 |
| Cigarettes per day (excluding nonsmokers)                                                                 | 2   | 637711 | 918059  | 357363 | -0.11 | 9.1E-01 | 0 |
| Right inferior lateral ventricle                                                                          | 3   | 610818 | 819869  | 320824 | -0.10 | 9.2E-01 | 0 |
| Cancer register - Histology of cancer tumour: Basal cell carcinoma, NOS                                   | 24  | 644454 | 930931  | 98940  | -0.10 | 9.2E-01 | 0 |
| Lipid::Long chain fatty acid::adrenate (22:4n6)                                                           | 1   | 631788 | 631788  | 631788 | -0.10 | 9.2E-01 | 0 |
| Triglycerides in medium VLDL                                                                              | 8   | 628013 | 1152693 | 85903  | -0.09 | 9.3E-01 | 0 |
| Glycine                                                                                                   | 4   | 629152 | 1251847 | 41670  | -0.09 | 9.3E-01 | 0 |
| Asthma                                                                                                    | 20  | 643551 | 1005998 | 292181 | -0.08 | 9.3E-01 | 0 |
| Sagittal stratum mode of anisotropy                                                                       | 2   | 658305 | 969691  | 346919 | -0.08 | 9.3E-01 | 0 |
| Hypertriglyceridemia                                                                                      | 4   | 629379 | 711532  | 580843 | -0.08 | 9.3E-01 | 0 |
| Neck cross-sectional moment of inertia (GEE, male, adjusted for age)                                      | 1   | 646793 | 646793  | 646793 | -0.08 | 9.4E-01 | 0 |
| Neutrophil percentage of white cells (two-way meta)                                                       | 80  | 663046 | 1133838 | 93413  | -0.08 | 9.4E-01 | 0 |
| NKeff:%314-158a+                                                                                          | 330 | 669176 | 1027133 | 213042 | -0.08 | 9.4E-01 | 0 |
| Pain type(s) experienced in last month: Stomach or abdominal pain                                         | 2   | 650809 | 888447  | 413171 | -0.07 | 9.4E-01 | 0 |
| Asthma (child-onset)                                                                                      | 67  | 661478 | 1088499 | 299055 | -0.07 | 9.4E-01 | 0 |
| Seen doctor (GP) for nerves, anxiety, tension or depression                                               | 25  | 654258 | 1139650 | 95918  | -0.07 | 9.4E-01 | 0 |
| Wheeze or whistling in the chest in last year                                                             | 24  | 651598 | 1131414 | 293286 | -0.07 | 9.4E-01 | 0 |
| Morning/evening person (chronotype)                                                                       | 112 | 667319 | 1162164 | 119263 | -0.07 | 9.4E-01 | 0 |
| Left insula                                                                                               | 4   | 627782 | 1311636 | 68113  | -0.07 | 9.4E-01 | 0 |
| Tea intake                                                                                                | 21  | 648410 | 1164618 | 306338 | -0.07 | 9.4E-01 | 0 |
| Total cholesterol / High-density lipoprotein cholesterol ratio (at exam 7, GEE, adjusted for age and sex) | 1   | 637505 | 637505  | 637505 | -0.07 | 9.4E-01 | 0 |
| CD55 - Complement decay-accelerating factor                                                               | 1   | 648823 | 648823  | 648823 | -0.07 | 9.4E-01 | 0 |
| AIMP1 - Endothelial monocyte-activating polypeptide 2                                                     | 1   | 649273 | 649273  | 649273 | -0.07 | 9.4E-01 | 0 |
| Focal Epilepsy                                                                                            | 1   | 649165 | 649165  | 649165 | -0.07 | 9.4E-01 | 0 |
| Diagnoses - secondary ICD10: E03 Other hypothyroidism                                                     | 40  | 657540 | 1108684 | 410239 | -0.07 | 9.5E-01 | 0 |
| Age-related Macular Degeneration                                                                          | 31  | 656655 | 997913  | 263322 | -0.06 | 9.5E-01 | 0 |
| Age at first birth (female)                                                                               | 5   | 629393 | 1276083 | 430185 | -0.06 | 9.5E-01 | 0 |

|                                                                                                           |     |        |         |        |       |         |   |
|-----------------------------------------------------------------------------------------------------------|-----|--------|---------|--------|-------|---------|---|
| Luteinizing hormone (at exam 3, GEE, adjusted for age and sex)                                            | 3   | 632718 | 719479  | 625394 | -0.06 | 9.5E-01 | 0 |
| Hearing aid user                                                                                          | 3   | 626783 | 945589  | 324752 | -0.06 | 9.5E-01 | 0 |
| Nucleotide::Purine metabolism, adenine containing::N1-methyladenosine                                     | 1   | 657820 | 657820  | 657820 | -0.06 | 9.6E-01 | 0 |
| Xenobiotics::Drug::2-methoxyacetaminophen sulfate*                                                        | 2   | 659686 | 938874  | 380497 | -0.06 | 9.6E-01 | 0 |
| Treatment/medication code: aspirin                                                                        | 4   | 642720 | 938733  | 349516 | -0.06 | 9.6E-01 | 0 |
| Non-butter spread type details: Flora Pro-Active or Benecol                                               | 6   | 636213 | 926591  | 402315 | -0.06 | 9.6E-01 | 0 |
| Maximum carotid artery bulb IMT (at exam 6, GEE, adjusted for age and sex)                                | 1   | 646203 | 646203  | 646203 | -0.05 | 9.6E-01 | 0 |
| ::::X-01911                                                                                               | 1   | 646865 | 646865  | 646865 | -0.05 | 9.6E-01 | 0 |
| CAMK1 - Calcium/calmodulin-dependent protein kinase type 1                                                | 2   | 664188 | 932595  | 395781 | -0.05 | 9.6E-01 | 0 |
| Lipid::Medium chain fatty acid::caprylate (8:0)                                                           | 2   | 658515 | 894426  | 422604 | -0.05 | 9.6E-01 | 0 |
| Right entorhinal                                                                                          | 3   | 634860 | 931785  | 379027 | -0.05 | 9.6E-01 | 0 |
| Lipid::Sterol, Steroid::5alpha-androstan-3beta,17beta-diol disulfate                                      | 3   | 640390 | 871106  | 345508 | -0.04 | 9.6E-01 | 0 |
| Retrolenticular part of internal capsule mode of anisotropy                                               | 6   | 631640 | 953067  | 325622 | -0.04 | 9.7E-01 | 0 |
| Hippocampal volume (GEE, adjusted for multivariable)                                                      | 1   | 660488 | 660488  | 660488 | -0.04 | 9.7E-01 | 0 |
| Treatment/medication code: levothyroxine sodium                                                           | 47  | 665375 | 1100020 | 345475 | -0.04 | 9.7E-01 | 0 |
| Hippocampal volume (GEE, adjusted for age and sex)                                                        | 1   | 660488 | 660488  | 660488 | -0.04 | 9.7E-01 | 0 |
| Amino acid::Glutamate metabolism::pyroglutamine*                                                          | 4   | 639446 | 1027879 | 362622 | -0.04 | 9.7E-01 | 0 |
| AGER - Advanced glycosylation end product-specific receptor, soluble                                      | 1   | 667833 | 667833  | 667833 | -0.03 | 9.7E-01 | 0 |
| Depression - Recent lack of interest of pleasure in doing things                                          | 1   | 662578 | 662578  | 662578 | -0.03 | 9.7E-01 | 0 |
| CST6 - Cystatin-M                                                                                         | 1   | 652085 | 652085  | 652085 | -0.03 | 9.7E-01 | 0 |
| Hemoglobin A1C                                                                                            | 9   | 645613 | 900685  | 505020 | -0.03 | 9.8E-01 | 0 |
| Left pars triangularis                                                                                    | 1   | 669333 | 669333  | 669333 | -0.03 | 9.8E-01 | 0 |
| Granulocyte percentage of myeloid white cells (two-way meta)                                              | 97  | 667925 | 1115185 | 93711  | -0.03 | 9.8E-01 | 0 |
| Body of corpus callosum axial diffusivities                                                               | 3   | 647943 | 1047060 | 407927 | -0.02 | 9.8E-01 | 0 |
| Tumor necrosis factor receptor II (at exam 7, GEE, adjusted for age and sex)                              | 1   | 673465 | 673465  | 673465 | -0.02 | 9.8E-01 | 0 |
| SNRPF - Small nuclear ribonucleoprotein F                                                                 | 1   | 678693 | 678693  | 678693 | -0.02 | 9.9E-01 | 0 |
| Non-albumin protein                                                                                       | 39  | 667463 | 1067198 | 411438 | -0.01 | 9.9E-01 | 0 |
| Interleukin-12p70                                                                                         | 3   | 657310 | 764339  | 383500 | -0.01 | 9.9E-01 | 0 |
| Shaft average buckling ratio (GEE, male, adjusted for age)                                                | 3   | 651995 | 854344  | 390326 | -0.01 | 9.9E-01 | 0 |
| SERPINA1 - Alpha-1-antitrypsin                                                                            | 1   | 675858 | 675858  | 675858 | -0.01 | 9.9E-01 | 0 |
| CTSA - Lysosomal protective protein                                                                       | 1   | 679143 | 679143  | 679143 | -0.01 | 9.9E-01 | 0 |
| CD36 - Platelet glycoprotein 4                                                                            | 1   | 682768 | 682768  | 682768 | -0.01 | 9.9E-01 | 0 |
| Lipid::Essential fatty acid::X-12990--docosapentaenoic acid (n6-DPA)                                      | 1   | 667463 | 667463  | 667463 | -0.01 | 9.9E-01 | 0 |
| Peptide::Fibrinogen cleavage peptide::ADpSGEGDFXAEAGGVR*                                                  | 1   | 682768 | 682768  | 682768 | -0.01 | 9.9E-01 | 0 |
| Total lipids in medium VLDL                                                                               | 8   | 651848 | 860042  | 156479 | -0.01 | 1.0E+00 | 0 |
| Type of accommodation lived in: A house or bungalow                                                       | 2   | 673859 | 991085  | 356634 | 0.00  | 1.0E+00 | 0 |
| Gamma-glutamyl transferase                                                                                | 32  | 665893 | 1172208 | 259429 | 0.00  | 1.0E+00 | 0 |
| Total cholesterol / High-density lipoprotein cholesterol ratio (at exam 1, GEE, adjusted for age and sex) | 1   | 671785 | 671785  | 671785 | 0.00  | 1.0E+00 | 0 |
| Glucose levels 2 h after an oral glucose challenge                                                        | 1   | 683278 | 683278  | 683278 | 0.00  | 1.0E+00 | 0 |
| Lipid::Inositol metabolism::scyllo-inositol                                                               | 1   | 680895 | 680895  | 680895 | 0.00  | 1.0E+00 | 0 |
| Body Mass Index (male)                                                                                    | 363 | 672625 | 1140566 | 176507 | 0.00  | 1.0E+00 | 0 |
| APOE - Apolipoprotein E (isoform E2)                                                                      | 1   | 678693 | 678693  | 678693 | 0.00  | 1.0E+00 | 0 |
| TIE1 - Tyrosine-protein kinase receptor Tie-1, soluble                                                    | 1   | 688525 | 688525  | 688525 | 0.00  | 1.0E+00 | 0 |



|                                                                                                    |     |        |         |        |      |         |   |
|----------------------------------------------------------------------------------------------------|-----|--------|---------|--------|------|---------|---|
| IDS - Iduronate 2-sulfatase                                                                        | 1   | 679143 | 679143  | 679143 | 0.00 | 1.0E+00 | 0 |
| Non-cancer illness code, self-reported: osteoarthritis                                             | 3   | 654168 | 848608  | 343179 | 0.00 | 1.0E+00 | 0 |
| ICAM2 - Intercellular adhesion molecule 2                                                          | 1   | 682768 | 682768  | 682768 | 0.01 | 1.0E+00 | 0 |
| CD200 - OX-2 membrane glycoprotein                                                                 | 1   | 682768 | 682768  | 682768 | 0.01 | 1.0E+00 | 0 |
| ::::X-11441                                                                                        | 1   | 680218 | 680218  | 680218 | 0.01 | 1.0E+00 | 0 |
| Salicylic acid and derivatives                                                                     | 6   | 658126 | 995141  | 413272 | 0.01 | 1.0E+00 | 0 |
| Total-body less head BMD                                                                           | 4   | 660009 | 985103  | 324646 | 0.01 | 9.9E-01 | 0 |
| CHST15 - Carbohydrate sulfotransferase 15                                                          | 1   | 682768 | 682768  | 682768 | 0.01 | 9.9E-01 | 0 |
| SELE - E-Selectin                                                                                  | 1   | 682768 | 682768  | 682768 | 0.01 | 9.9E-01 | 0 |
| Basophil percentage of granulocytes (three-way meta)                                               | 38  | 669313 | 1004079 | 126006 | 0.01 | 9.9E-01 | 0 |
| CTSZ - Cathepsin Z                                                                                 | 1   | 679143 | 679143  | 679143 | 0.01 | 9.9E-01 | 0 |
| ::::X-11442                                                                                        | 1   | 680218 | 680218  | 680218 | 0.01 | 9.9E-01 | 0 |
| INSR - Insulin receptor                                                                            | 1   | 682768 | 682768  | 682768 | 0.01 | 9.9E-01 | 0 |
| Lipid::Fatty acid metabolism (also BCAA metabolism)::butyrylcarnitine                              | 4   | 661675 | 1076433 | 267493 | 0.02 | 9.9E-01 | 0 |
| ::::X-12627                                                                                        | 1   | 690760 | 690760  | 690760 | 0.02 | 9.9E-01 | 0 |
| Eosinophil percentage of granulocytes (three-way meta)                                             | 114 | 673229 | 1086919 | 84834  | 0.02 | 9.9E-01 | 0 |
| Lipid::Long chain fatty acid::pentadecanoate (15:0)                                                | 1   | 694215 | 694215  | 694215 | 0.02 | 9.9E-01 | 0 |
| ENG - Endoglin                                                                                     | 1   | 682768 | 682768  | 682768 | 0.02 | 9.8E-01 | 0 |
| Serum calcium (at exam 2, GEE, adjusted for age and sex)                                           | 1   | 693178 | 693178  | 693178 | 0.02 | 9.8E-01 | 0 |
| Hand grip (at exam 7, GEE)                                                                         | 2   | 691033 | 736609  | 645456 | 0.02 | 9.8E-01 | 0 |
| Had other major operations                                                                         | 1   | 693428 | 693428  | 693428 | 0.02 | 9.8E-01 | 0 |
| Hand grip (at offspring exam 7 cohort exam 27, GEE)                                                | 2   | 691033 | 736609  | 645456 | 0.02 | 9.8E-01 | 0 |
| Uncinate fasciculus axial diusivities                                                              | 1   | 693060 | 693060  | 693060 | 0.02 | 9.8E-01 | 0 |
| Citrate                                                                                            | 4   | 666720 | 896784  | 548718 | 0.02 | 9.8E-01 | 0 |
| Posterior thalamic radiation (include optic radiation) fractional anisotropy                       | 1   | 695505 | 695505  | 695505 | 0.02 | 9.8E-01 | 0 |
| Interleukin-10                                                                                     | 2   | 694316 | 712819  | 675813 | 0.02 | 9.8E-01 | 0 |
| Inferior fronto-occipital fasciculus radial diusivities                                            | 1   | 693060 | 693060  | 693060 | 0.03 | 9.8E-01 | 0 |
| ::::X-11799                                                                                        | 1   | 691853 | 691853  | 691853 | 0.03 | 9.8E-01 | 0 |
| Intermediate-density lipoprotein by NMR (at exam 4, GEE, adjusted for multivariable)               | 12  | 662720 | 987299  | 63628  | 0.03 | 9.8E-01 | 0 |
| Age of initiation of regular smoking                                                               | 5   | 662633 | 1188550 | 465385 | 0.03 | 9.7E-01 | 0 |
| Right postcentral                                                                                  | 3   | 669333 | 909503  | 351999 | 0.03 | 9.7E-01 | 0 |
| Daytime sleepiness / dozing                                                                        | 1   | 701585 | 701585  | 701585 | 0.04 | 9.7E-01 | 0 |
| ::::X-02269                                                                                        | 3   | 671508 | 1023313 | 547845 | 0.04 | 9.7E-01 | 0 |
| Lymphocyte percentage of white cells (three-way meta)                                              | 96  | 678575 | 1135889 | 95754  | 0.04 | 9.7E-01 | 0 |
| Right pars triangularis                                                                            | 5   | 669333 | 677188  | 59909  | 0.04 | 9.7E-01 | 0 |
| Uncinate fasciculus mean diusivities                                                               | 1   | 703043 | 703043  | 703043 | 0.04 | 9.6E-01 | 0 |
| Phospholipids in medium VLDL                                                                       | 10  | 666598 | 1093759 | 253186 | 0.05 | 9.6E-01 | 0 |
| Cognitive performance                                                                              | 153 | 676120 | 1082510 | 92619  | 0.05 | 9.6E-01 | 0 |
| Reason for glasses/contact lenses: For just reading/near work as you are getting older (called 'pr | 3   | 680180 | 840683  | 363239 | 0.05 | 9.6E-01 | 0 |
| Uncinate fasciculus radial diusivities                                                             | 1   | 703043 | 703043  | 703043 | 0.05 | 9.6E-01 | 0 |
| Subcutaneous adipose tissue volume                                                                 | 1   | 712045 | 712045  | 712045 | 0.05 | 9.6E-01 | 0 |
| Basophil percentage of white cells (three-way meta)                                                | 44  | 677086 | 1033089 | 124297 | 0.05 | 9.6E-01 | 0 |
| Geographic atrophy                                                                                 | 3   | 678693 | 758206  | 552133 | 0.05 | 9.6E-01 | 0 |

|                                                                                     |     |        |         |        |      |         |   |
|-------------------------------------------------------------------------------------|-----|--------|---------|--------|------|---------|---|
| MMP8 - Neutrophil collagenase                                                       | 3   | 677845 | 730991  | 567746 | 0.05 | 9.6E-01 | 0 |
| Left supramarginal                                                                  | 5   | 669333 | 690300  | 66903  | 0.05 | 9.6E-01 | 0 |
| PLAUR - Urokinase plasminogen activator surface receptor                            | 1   | 710330 | 710330  | 710330 | 0.06 | 9.6E-01 | 0 |
| Basophil percentage of white cells (two-way meta)                                   | 29  | 676158 | 1020317 | 126312 | 0.06 | 9.6E-01 | 0 |
| White blood cells                                                                   | 7   | 673745 | 920073  | 480588 | 0.06 | 9.5E-01 | 0 |
| Morningness                                                                         | 117 | 678165 | 1160463 | 120689 | 0.06 | 9.5E-01 | 0 |
| Weight (female)                                                                     | 10  | 675399 | 1111026 | 315026 | 0.06 | 9.5E-01 | 0 |
| Thyroid-stimulating hormone (male)                                                  | 21  | 676045 | 919705  | 602028 | 0.07 | 9.5E-01 | 0 |
| Neutrophil count (three-way meta)                                                   | 95  | 678315 | 1169459 | 104621 | 0.07 | 9.5E-01 | 0 |
| FLT4 - Vascular endothelial growth factor receptor 3                                | 3   | 688525 | 775538  | 685646 | 0.07 | 9.4E-01 | 0 |
| Lipid::Monoacylglycerol::1-stearoylglycerol (1-monostearin)                         | 1   | 712063 | 712063  | 712063 | 0.07 | 9.4E-01 | 0 |
| Interleukin-17                                                                      | 1   | 725510 | 725510  | 725510 | 0.07 | 9.4E-01 | 0 |
| Childhood obesity                                                                   | 6   | 673271 | 1101319 | 319310 | 0.07 | 9.4E-01 | 0 |
| IL17RD - Interleukin-17 receptor D                                                  | 1   | 717630 | 717630  | 717630 | 0.07 | 9.4E-01 | 0 |
| Monocyte count                                                                      | 27  | 680480 | 1095929 | 217991 | 0.07 | 9.4E-01 | 0 |
| Amino acid::Tryptophan metabolism::indolelactate                                    | 1   | 723603 | 723603  | 723603 | 0.07 | 9.4E-01 | 0 |
| Lipid::Lysolipid::1-eicosadienoylglycerophosphocholine*                             | 1   | 717513 | 717513  | 717513 | 0.07 | 9.4E-01 | 0 |
| Right ventral DC                                                                    | 6   | 679235 | 1226819 | 77010  | 0.08 | 9.4E-01 | 0 |
| CSF3 - Granulocyte colony-stimulating factor                                        | 1   | 730453 | 730453  | 730453 | 0.08 | 9.4E-01 | 0 |
| Epworth Sleepiness Scale (GEE, adjusted for age, sex, BMI and usual sleep duration) | 3   | 695350 | 856394  | 672824 | 0.08 | 9.4E-01 | 0 |
| Glutamine                                                                           | 6   | 678170 | 1395566 | 58720  | 0.08 | 9.4E-01 | 0 |
| High cholesterol lipoprotein                                                        | 17  | 675745 | 1322198 | 53854  | 0.08 | 9.4E-01 | 0 |
| Estimated glomerular filtration rate based on serum creatinine (non-diabetic)       | 61  | 680143 | 1000742 | 147526 | 0.08 | 9.4E-01 | 0 |
| Monocyte count (two-way meta)                                                       | 113 | 680480 | 1150310 | 96751  | 0.08 | 9.3E-01 | 0 |
| Inferior fronto-occipital fasciculus mode of anisotropy                             | 2   | 710418 | 818784  | 602051 | 0.08 | 9.3E-01 | 0 |
| Zinc sulfate turbidity test                                                         | 2   | 713658 | 1014365 | 412950 | 0.08 | 9.3E-01 | 0 |
| Basophil count (two-way meta)                                                       | 41  | 680480 | 1065250 | 84667  | 0.08 | 9.3E-01 | 0 |
| Remnant lipoprotein cholesterol (at exam 4, GEE)                                    | 2   | 714651 | 834193  | 595109 | 0.08 | 9.3E-01 | 0 |
| Frequency of friend/family visits                                                   | 10  | 677620 | 1352924 | 135529 | 0.09 | 9.3E-01 | 0 |
| Loneliness, isolation (LONE)                                                        | 4   | 690156 | 1055344 | 442737 | 0.09 | 9.3E-01 | 0 |
| Family relationship satisfaction                                                    | 1   | 735878 | 735878  | 735878 | 0.09 | 9.3E-01 | 0 |
| Left posterior cingulate                                                            | 1   | 727988 | 727988  | 727988 | 0.09 | 9.3E-01 | 0 |
| Epworth Sleepiness Scale (GEE, adjusted for age, sex and BMI)                       | 3   | 695350 | 856394  | 672824 | 0.09 | 9.3E-01 | 0 |
| Lipid::Sphingolipid::palmitoyl sphingomyelin                                        | 1   | 737510 | 737510  | 737510 | 0.09 | 9.3E-01 | 0 |
| Diagnoses - main ICD10: C44 Other and unspecified malignant neoplasm of skin        | 26  | 682456 | 967618  | 200524 | 0.09 | 9.3E-01 | 0 |
| Serum levels of soluble E-selectin with T1D                                         | 1   | 730695 | 730695  | 730695 | 0.09 | 9.3E-01 | 0 |
| Right cerebellum white matter                                                       | 13  | 684965 | 1317335 | 399468 | 0.10 | 9.2E-01 | 0 |
| Amino acid::Glutathione metabolism::5-oxoproline                                    | 1   | 737328 | 737328  | 737328 | 0.10 | 9.2E-01 | 0 |
| Biologic age by osseographic scoring system (GEE, adjusted for multivariable)       | 1   | 731040 | 731040  | 731040 | 0.10 | 9.2E-01 | 0 |
| Total cholesterol (at exam 6, GEE, adjusted for age and sex)                        | 3   | 702050 | 989013  | 648325 | 0.10 | 9.2E-01 | 0 |
| IL5RA - Interleukin-5 receptor subunit alpha                                        | 1   | 736593 | 736593  | 736593 | 0.10 | 9.2E-01 | 0 |
| Treatment/medication code: simvastatin                                              | 20  | 683355 | 873274  | 215978 | 0.10 | 9.2E-01 | 0 |
| Advanced adenoma                                                                    | 1   | 730130 | 730130  | 730130 | 0.10 | 9.2E-01 | 0 |

|                                                                                        |    |        |         |        |      |         |   |
|----------------------------------------------------------------------------------------|----|--------|---------|--------|------|---------|---|
| Chronic kidney disease (at exam 7, GEE, adjusted for age and sex)                      | 33 | 686600 | 1054995 | 384010 | 0.10 | 9.2E-01 | 0 |
| Bust size                                                                              | 2  | 721569 | 763804  | 679333 | 0.11 | 9.2E-01 | 0 |
| LCMT1 - Leucine carboxyl methyltransferase 1                                           | 2  | 727061 | 1052119 | 402003 | 0.11 | 9.1E-01 | 0 |
| MASP1 - Mannan-binding lectin serine protease 1                                        | 1  | 739498 | 739498  | 739498 | 0.11 | 9.1E-01 | 0 |
| Cofactors and vitamins::Ascorbate and aldarate metabolism::X-11593--O-methylascorbate* | 5  | 694273 | 810723  | 646865 | 0.11 | 9.1E-01 | 0 |
| Human-virus - gp41 C34 peptide, HIV                                                    | 1  | 740338 | 740338  | 740338 | 0.11 | 9.1E-01 | 0 |
| ::::X-11470                                                                            | 1  | 732723 | 732723  | 732723 | 0.11 | 9.1E-01 | 0 |
| Maximum carotid artery stenosis (at exam 6, GEE, adjusted for age and sex)             | 2  | 724583 | 908731  | 540434 | 0.12 | 9.1E-01 | 0 |
| VEGFA - Vascular endothelial growth factor A, isoform 121                              | 1  | 742125 | 742125  | 742125 | 0.12 | 9.1E-01 | 0 |
| LYZ - Lysozyme C                                                                       | 1  | 745753 | 745753  | 745753 | 0.12 | 9.0E-01 | 0 |
| Leprosy                                                                                | 2  | 730364 | 870164  | 590563 | 0.12 | 9.0E-01 | 0 |
| Types of transport used (excluding work): Cycle                                        | 1  | 746725 | 746725  | 746725 | 0.12 | 9.0E-01 | 0 |
| QT interval (male, cohort exam 11 offspring exam 1, GEE, adjusted for age nad RR)      | 3  | 711275 | 844996  | 549950 | 0.13 | 9.0E-01 | 0 |
| MMP1 - Interstitial collagenase                                                        | 1  | 752188 | 752188  | 752188 | 0.13 | 9.0E-01 | 0 |
| Spine Neck BMD (GEE, female, adjusted for multivariable)                               | 1  | 746478 | 746478  | 746478 | 0.13 | 9.0E-01 | 0 |
| Lipid::Sterol, Steroid::dehydroisoandrosterone sulfate (DHEA-S)                        | 2  | 729131 | 973597  | 484665 | 0.13 | 9.0E-01 | 0 |
| Lipid::Sterol, Steroid::4-androsten-3beta,17beta-diol disulfate 1*                     | 2  | 729131 | 973597  | 484665 | 0.13 | 9.0E-01 | 0 |
| Platelet aggregation to collagen (at exam 5, GEE, adjusted for age and sex)            | 1  | 754025 | 754025  | 754025 | 0.13 | 9.0E-01 | 0 |
| Superior corona radiata fractional anisotropy                                          | 4  | 697195 | 760934  | 523477 | 0.13 | 9.0E-01 | 0 |
| Moderate intensity                                                                     | 1  | 760235 | 760235  | 760235 | 0.13 | 9.0E-01 | 0 |
| Lipid::Carnitine metabolism::palmitoylcarnitine                                        | 1  | 758448 | 758448  | 758448 | 0.13 | 9.0E-01 | 0 |
| Tumor necrosis factor alpha (at exam 7, GEE, adjusted for multivariable)               | 4  | 696709 | 742702  | 550973 | 0.13 | 9.0E-01 | 0 |
| Genu of corpus callosum axial diffusivities                                            | 3  | 707440 | 1132926 | 606061 | 0.13 | 8.9E-01 | 0 |
| Amino acid::Valine, leucine and isoleucine metabolism::isobutyrylcarnitine             | 2  | 731771 | 992866  | 470677 | 0.14 | 8.9E-01 | 0 |
| XCL1 - Lymphotoxin                                                                     | 1  | 754380 | 754380  | 754380 | 0.14 | 8.9E-01 | 0 |
| Platelet aggregation to collagen (at exam 5, GEE, adjusted for multivariable)          | 1  | 754025 | 754025  | 754025 | 0.14 | 8.9E-01 | 0 |
| Retrolenticular part of internal capsule fractional anisotropy                         | 4  | 699931 | 1028419 | 362049 | 0.14 | 8.9E-01 | 0 |
| Total cholesterol (at exam 4, GEE, adjusted for age and sex)                           | 2  | 737199 | 811613  | 662784 | 0.14 | 8.9E-01 | 0 |
| Fasting plasma glucose (at exam 7, GEE, adjusted for age, sex and BMI)                 | 5  | 707010 | 1081133 | 658788 | 0.14 | 8.9E-01 | 0 |
| Lipid::Carnitine metabolism::oleoylcarnitine                                           | 1  | 758448 | 758448  | 758448 | 0.14 | 8.9E-01 | 0 |
| Thin vs extreme obese                                                                  | 2  | 737646 | 830016  | 645277 | 0.14 | 8.9E-01 | 0 |
| CH2 groups to double bonds ratio                                                       | 4  | 705436 | 922774  | 496423 | 0.15 | 8.8E-01 | 0 |
| High-density-lipoprotein cholesterol                                                   | 29 | 694580 | 1052688 | 103741 | 0.15 | 8.8E-01 | 0 |
| Femoral Neck BMD (GEE, female, adjusted for multivariable)                             | 2  | 736355 | 866749  | 605961 | 0.16 | 8.8E-01 | 0 |
| Lymphocyte count                                                                       | 10 | 698776 | 1347217 | 201352 | 0.16 | 8.8E-01 | 0 |
| Cholesterol esters in medium HDL                                                       | 6  | 702551 | 871428  | 199109 | 0.16 | 8.7E-01 | 0 |
| Symbol digit substitution test - Number of symbol digit matches attempted              | 6  | 705734 | 1240339 | 455333 | 0.16 | 8.7E-01 | 0 |
| Antidepressants                                                                        | 1  | 769455 | 769455  | 769455 | 0.16 | 8.7E-01 | 0 |
| SERPINA4 - Kallistatin                                                                 | 1  | 775320 | 775320  | 775320 | 0.17 | 8.7E-01 | 0 |
| Posterior cortical atrophy                                                             | 3  | 719763 | 804408  | 387647 | 0.17 | 8.7E-01 | 0 |
| CCL15 - C-C motif chemokine 15                                                         | 1  | 770930 | 770930  | 770930 | 0.17 | 8.6E-01 | 0 |
| Spread type: Butter/spreadable butter                                                  | 8  | 706016 | 1029411 | 349474 | 0.17 | 8.6E-01 | 0 |
| Superior longitudinal fasciculus mean diffusivities                                    | 3  | 729058 | 1076166 | 516526 | 0.17 | 8.6E-01 | 0 |

|                                                                                                  |     |        |         |        |      |         |   |
|--------------------------------------------------------------------------------------------------|-----|--------|---------|--------|------|---------|---|
| Right amygdala                                                                                   | 6   | 709455 | 1023940 | 394565 | 0.18 | 8.6E-01 | 0 |
| Heart rate recovery at 20 secnds                                                                 | 15  | 705170 | 1033409 | 198798 | 0.18 | 8.6E-01 | 0 |
| Right precuneus                                                                                  | 2   | 748906 | 1094522 | 403291 | 0.18 | 8.6E-01 | 0 |
| First PC of the four risky behaviours                                                            | 64  | 694644 | 1229573 | 198975 | 0.18 | 8.6E-01 | 0 |
| Snoring                                                                                          | 34  | 698791 | 1242741 | 111614 | 0.18 | 8.6E-01 | 0 |
| Concentration of small VLDL particles                                                            | 12  | 702551 | 949047  | 421839 | 0.18 | 8.6E-01 | 0 |
| Medication for pain relief, constipation, heartburn: Aspirin                                     | 4   | 719566 | 1061144 | 300735 | 0.18 | 8.6E-01 | 0 |
| Coffee cups per day                                                                              | 1   | 780430 | 780430  | 780430 | 0.18 | 8.5E-01 | 0 |
| Impedance measures - Impedance of leg (left)                                                     | 447 | 682503 | 1155285 | 124853 | 0.19 | 8.5E-01 | 0 |
| Hemoglobin A1c                                                                                   | 21  | 705053 | 1112253 | 417280 | 0.20 | 8.4E-01 | 0 |
| Mean coronary artery calcification - Agatston score (at exam 7, GEE, adjusted for multivariable) | 1   | 781405 | 781405  | 781405 | 0.20 | 8.4E-01 | 0 |
| Amino acid::Phenylalanine & tyrosine metabolism::3-(4-hydroxyphenyl)lactate                      | 1   | 786553 | 786553  | 786553 | 0.20 | 8.4E-01 | 0 |
| Low-density lipoprotein cholesterol (at exam 2, GEE, adjusted for age and sex)                   | 1   | 781405 | 781405  | 781405 | 0.20 | 8.4E-01 | 0 |
| WIF1 - Wnt inhibitory factor 1                                                                   | 1   | 793583 | 793583  | 793583 | 0.20 | 8.4E-01 | 0 |
| ::::X-11412                                                                                      | 1   | 797550 | 797550  | 797550 | 0.21 | 8.4E-01 | 0 |
| Mean thyroid stimulation hormone from exam 3 and 4 (GEE, adjusted for multivariable)             | 2   | 759696 | 1017835 | 501556 | 0.21 | 8.3E-01 | 0 |
| ::::X-11792                                                                                      | 2   | 755300 | 829280  | 681320 | 0.21 | 8.3E-01 | 0 |
| Right lateral orbitofrontal                                                                      | 5   | 735818 | 1284313 | 695640 | 0.21 | 8.3E-01 | 0 |
| Blood clot, DVT, bronchitis, emphysema, asthma, rhinitis, eczema, allergy diagnosed by doctor: H | 111 | 690818 | 1120401 | 99927  | 0.21 | 8.3E-01 | 0 |
| Basophil percentage of granulocytes (two-way meta)                                               | 28  | 703709 | 1128588 | 109064 | 0.22 | 8.3E-01 | 0 |
| Illnesses of mother: Breast cancer                                                               | 12  | 713113 | 1123981 | 72306  | 0.22 | 8.3E-01 | 0 |
| Cancer (diagnosed by doctor)                                                                     | 5   | 729058 | 1116113 | 718645 | 0.22 | 8.2E-01 | 0 |
| Free thyroxine (FT4, male)                                                                       | 7   | 719743 | 892615  | 514966 | 0.22 | 8.2E-01 | 0 |
| High-density lipoprotein cholesterol (at exam 4, GEE, adjusted for age and sex)                  | 2   | 768730 | 927589  | 609871 | 0.22 | 8.2E-01 | 0 |
| Right cerebellum exterior                                                                        | 21  | 713013 | 1015942 | 37856  | 0.23 | 8.2E-01 | 0 |
| ::::X-18601                                                                                      | 2   | 766418 | 937535  | 595300 | 0.23 | 8.2E-01 | 0 |
| Non-cancer illness code, self-reported: depression                                               | 1   | 803498 | 803498  | 803498 | 0.23 | 8.1E-01 | 0 |
| HAVCR2 - Hepatitis A virus cellular receptor 2                                                   | 1   | 802273 | 802273  | 802273 | 0.24 | 8.1E-01 | 0 |
| High-density lipoprotein 3 cholesterol (at exam 4, GEE, adjusted for age and sex)                | 2   | 768730 | 927589  | 609871 | 0.24 | 8.1E-01 | 0 |
| Relative age voice broke (male)                                                                  | 26  | 709688 | 1009222 | 141234 | 0.24 | 8.1E-01 | 0 |
| Current employment status: Doing unpaid or voluntary work                                        | 3   | 760953 | 960884  | 418647 | 0.24 | 8.1E-01 | 0 |
| Amino acid::Creatine metabolism::creatine                                                        | 1   | 804745 | 804745  | 804745 | 0.24 | 8.1E-01 | 0 |
| Number of live births (female)                                                                   | 7   | 734533 | 1061604 | 98554  | 0.24 | 8.1E-01 | 0 |
| Amino acid::Glycine, serine and threonine metabolism::glycine                                    | 1   | 804745 | 804745  | 804745 | 0.24 | 8.1E-01 | 0 |
| Platelet distribution width (two-way meta)                                                       | 122 | 694173 | 1116600 | 144377 | 0.25 | 8.1E-01 | 0 |
| Forearm BMD                                                                                      | 3   | 760258 | 1174644 | 578291 | 0.25 | 8.1E-01 | 0 |
| Lipid::Monoacylglycerol::1-oleoylglycerol (1-monoolein)                                          | 1   | 818555 | 818555  | 818555 | 0.25 | 8.0E-01 | 0 |
| CNDP1 - Beta-Ala-His dipeptidase                                                                 | 1   | 811238 | 811238  | 811238 | 0.25 | 8.0E-01 | 0 |
| ::::X-11452                                                                                      | 1   | 822285 | 822285  | 822285 | 0.25 | 8.0E-01 | 0 |
| Splenium of corpus callosum fractional anisotropy                                                | 5   | 740255 | 970290  | 695505 | 0.26 | 8.0E-01 | 0 |
| Amino acid::Lysine metabolism::glutaroyl carnitine                                               | 8   | 726981 | 1094302 | 443685 | 0.26 | 8.0E-01 | 0 |
| Eosinophil count (two-way meta)                                                                  | 106 | 697781 | 1141567 | 130407 | 0.26 | 8.0E-01 | 0 |
| Ever had known person concerned about, or recommended reduction of alcohol consumption           | 2   | 774169 | 838752  | 709586 | 0.26 | 7.9E-01 | 0 |

|                                                                                                           |     |        |         |        |      |         |   |
|-----------------------------------------------------------------------------------------------------------|-----|--------|---------|--------|------|---------|---|
| Mineral and other dietary supplements: Calcium                                                            | 4   | 749432 | 1492680 | 40017  | 0.26 | 7.9E-01 | 0 |
| Albuminuria                                                                                               | 31  | 714893 | 1137285 | 249761 | 0.27 | 7.9E-01 | 0 |
| Total cholesterol / High-density lipoprotein cholesterol ratio (at exam 2, GEE, adjusted for age and sex) | 3   | 766583 | 773994  | 513825 | 0.27 | 7.9E-01 | 0 |
| Total cholesterol (at exam 7, GEE, adjusted for age and sex)                                              | 1   | 818283 | 818283  | 818283 | 0.27 | 7.9E-01 | 0 |
| CNTN4 - Contactin-4                                                                                       | 1   | 823563 | 823563  | 823563 | 0.27 | 7.9E-01 | 0 |
| Age high blood pressure diagnosed                                                                         | 9   | 729583 | 1372948 | 84496  | 0.27 | 7.9E-01 | 0 |
| Mean abdominal aortic calcification - Agatston score (at exam 7, GEE, adjusted for age and sex)           | 2   | 778343 | 791410  | 765275 | 0.27 | 7.9E-01 | 0 |
| Ever unenthusiastic/disinterested for a whole week                                                        | 2   | 782587 | 1140742 | 424432 | 0.27 | 7.9E-01 | 0 |
| ::::X-11327                                                                                               | 2   | 787613 | 1007905 | 567320 | 0.27 | 7.8E-01 | 0 |
| Lipid::Eicosanoid::X-12441--12-hydroxyeicosatetraenoate (12-HETE)                                         | 1   | 831750 | 831750  | 831750 | 0.28 | 7.8E-01 | 0 |
| Inflammatory Bowel Disease                                                                                | 132 | 697886 | 1126955 | 148760 | 0.29 | 7.8E-01 | 0 |
| ESD - S-formylglutathione hydrolase                                                                       | 1   | 846518 | 846517  | 846517 | 0.29 | 7.7E-01 | 0 |
| Diagnoses - main ICD10: K57 Diverticular disease of intestine                                             | 12  | 732865 | 1004836 | 394734 | 0.29 | 7.7E-01 | 0 |
| Frequency of tenseness / restlessness in last 2 weeks                                                     | 8   | 739929 | 1016108 | 310178 | 0.29 | 7.7E-01 | 0 |
| WFIKKN2 - WAP, Kazal, immunoglobulin, Kunitz and NTR domain-containing protein 2                          | 1   | 840440 | 840440  | 840440 | 0.29 | 7.7E-01 | 0 |
| Cancer register - Behaviour of cancer tumour: Carcinoma in situ                                           | 1   | 840790 | 840790  | 840790 | 0.29 | 7.7E-01 | 0 |
| Mean corpuscular hemoglobin (two-way meta)                                                                | 137 | 697765 | 1216680 | 220254 | 0.29 | 7.7E-01 | 0 |
| Disialylation                                                                                             | 1   | 835425 | 835425  | 835425 | 0.29 | 7.7E-01 | 0 |
| Obesity class 1                                                                                           | 16  | 730111 | 1262095 | 383953 | 0.30 | 7.7E-01 | 0 |
| Heart rate variability (SDNN)                                                                             | 6   | 751738 | 1298050 | 161926 | 0.30 | 7.7E-01 | 0 |
| Total bilirubin                                                                                           | 8   | 738733 | 1342429 | 91881  | 0.30 | 7.7E-01 | 0 |
| Cingulum (hippocampus) fractional anisotropy                                                              | 1   | 840440 | 840440  | 840440 | 0.30 | 7.6E-01 | 0 |
| Lipid::Fatty acid metabolism (also BCAA metabolism)::propionylcarnitine                                   | 4   | 758270 | 1254596 | 388469 | 0.30 | 7.6E-01 | 0 |
| Uncinate fasciculus fractional anisotropy                                                                 | 2   | 790013 | 994476  | 585549 | 0.30 | 7.6E-01 | 0 |
| Hyperthyroidism                                                                                           | 10  | 740721 | 1123445 | 424717 | 0.30 | 7.6E-01 | 0 |
| Sleep sedentary (conditioning sex and BMI)                                                                | 5   | 759793 | 1561180 | 701760 | 0.30 | 7.6E-01 | 0 |
| Drugs affecting bone structure and mineralization                                                         | 10  | 739629 | 1139094 | 433414 | 0.31 | 7.6E-01 | 0 |
| IL17RB - interleukin-17 receptor B                                                                        | 1   | 843100 | 843100  | 843100 | 0.31 | 7.6E-01 | 0 |
| Amino acid::Phenylalanine & tyrosine metabolism::phenyllactate (PLA)                                      | 1   | 841233 | 841233  | 841233 | 0.31 | 7.6E-01 | 0 |
| HbA1c                                                                                                     | 54  | 714065 | 1209588 | 383161 | 0.31 | 7.6E-01 | 0 |
| Intermediate high-density lipoprotein by NMR (at exam 4, GEE, adjusted for age and sex)                   | 1   | 844268 | 844267  | 844267 | 0.31 | 7.6E-01 | 0 |
| Diagnoses - main ICD10: R10 Abdominal and pelvic pain                                                     | 1   | 845510 | 845510  | 845510 | 0.31 | 7.6E-01 | 0 |
| Arms-arm fat ratio (female)                                                                               | 118 | 700878 | 1034723 | 102815 | 0.31 | 7.6E-01 | 0 |
| CST1 - Cystatin-SN                                                                                        | 2   | 803341 | 1158676 | 448007 | 0.31 | 7.5E-01 | 0 |
| Right hippocampus                                                                                         | 12  | 737163 | 905236  | 433041 | 0.32 | 7.5E-01 | 0 |
| BCL2A1 - Bcl-2-related protein A1                                                                         | 1   | 851908 | 851908  | 851908 | 0.32 | 7.5E-01 | 0 |
| Left inferior lateral ventricle                                                                           | 4   | 766684 | 984178  | 446730 | 0.32 | 7.5E-01 | 0 |
| CST2 - Cystatin-SA                                                                                        | 2   | 803341 | 1158676 | 448007 | 0.33 | 7.4E-01 | 0 |
| Periodontal complex trait 3 - Aa trait                                                                    | 2   | 798903 | 961373  | 636433 | 0.33 | 7.4E-01 | 0 |
| Creatine kinase                                                                                           | 30  | 723366 | 1011169 | 66381  | 0.33 | 7.4E-01 | 0 |
| Retrolenticular part of internal capsule mean diffusivities                                               | 2   | 801855 | 855030  | 748680 | 0.33 | 7.4E-01 | 0 |
| Mineral and other dietary supplements: Fish oil (including cod liver oil)                                 | 6   | 753070 | 1034334 | 179905 | 0.33 | 7.4E-01 | 0 |
| Lipid::Sterol, Steroid::4-androsten-3beta,17beta-diol disulfate 2*                                        | 2   | 802881 | 1179008 | 426753 | 0.33 | 7.4E-01 | 0 |

|                                                                                     |     |        |         |        |      |         |   |
|-------------------------------------------------------------------------------------|-----|--------|---------|--------|------|---------|---|
| Atrial fibrillation                                                                 | 103 | 704448 | 1122404 | 342304 | 0.33 | 7.4E-01 | 0 |
| HRG - Histidine-rich glycoprotein                                                   | 1   | 859163 | 859163  | 859163 | 0.34 | 7.4E-01 | 0 |
| Lipid::Sterol, Steroid::cortisone                                                   | 1   | 870475 | 870475  | 870475 | 0.34 | 7.4E-01 | 0 |
| FETUB - Fetuin-B                                                                    | 1   | 859163 | 859163  | 859163 | 0.34 | 7.4E-01 | 0 |
| Relative wall thickness                                                             | 1   | 853988 | 853988  | 853988 | 0.34 | 7.3E-01 | 0 |
| ETHE1 - Persulfide dioxygenase ETHE1, mitochondrial                                 | 1   | 859163 | 859163  | 859163 | 0.34 | 7.3E-01 | 0 |
| Nap during day                                                                      | 75  | 711078 | 1105469 | 130951 | 0.34 | 7.3E-01 | 0 |
| Free thyroxine (FT4, female)                                                        | 9   | 757165 | 821192  | 310785 | 0.34 | 7.3E-01 | 0 |
| ICAM5 - Intercellular adhesion molecule 5                                           | 1   | 863173 | 863173  | 863173 | 0.34 | 7.3E-01 | 0 |
| Heart rate variability (RMSSD)                                                      | 7   | 767923 | 1475635 | 326952 | 0.35 | 7.3E-01 | 0 |
| ICAM1 - Intercellular adhesion molecule 1                                           | 1   | 863173 | 863173  | 863173 | 0.35 | 7.3E-01 | 0 |
| Amino acid::Valine, leucine and isoleucine metabolism::hydroxyisovaleroyl carnitine | 2   | 809280 | 1142384 | 476177 | 0.35 | 7.3E-01 | 0 |
| Phospholipids in LDL                                                                | 12  | 746061 | 1154155 | 95473  | 0.35 | 7.3E-01 | 0 |
| AHSG - Alpha-2-HS-glycoprotein                                                      | 1   | 869150 | 869150  | 869150 | 0.35 | 7.3E-01 | 0 |
| Peptide::Dipeptide::X-14208--phenylalanylserine                                     | 1   | 866553 | 866553  | 866553 | 0.35 | 7.3E-01 | 0 |
| Facial ageing                                                                       | 55  | 718705 | 1052721 | 90395  | 0.35 | 7.2E-01 | 0 |
| Antihypertensives                                                                   | 2   | 818203 | 848533  | 787873 | 0.36 | 7.2E-01 | 0 |
| N-glycosylation                                                                     | 6   | 772176 | 1259329 | 502829 | 0.36 | 7.2E-01 | 0 |
| Visual scanning and motor speed (GEE, adjusted for multivariable)                   | 2   | 816872 | 1132989 | 500756 | 0.36 | 7.2E-01 | 0 |
| Inferior fronto-occipital fasciculus fractional anisotropy                          | 4   | 773926 | 961300  | 624258 | 0.36 | 7.2E-01 | 0 |
| Transport type for commuting to job workplace: Car/motor vehicle                    | 1   | 864035 | 864035  | 864035 | 0.37 | 7.1E-01 | 0 |
| Mean corpuscular hemoglobin                                                         | 65  | 714893 | 1101913 | 90714  | 0.37 | 7.1E-01 | 0 |
| Amino acid::Alanine and aspartate metabolism::asparagine                            | 3   | 809285 | 889586  | 803198 | 0.37 | 7.1E-01 | 0 |
| Fasting plasma glucose (at exam 7, GEE, adjusted for age and sex)                   | 12  | 751496 | 1085908 | 482089 | 0.37 | 7.1E-01 | 0 |
| Falls in the last year                                                              | 5   | 783183 | 893328  | 238323 | 0.37 | 7.1E-01 | 0 |
| High light scatter percentage of red cells (three-way meta)                         | 118 | 707310 | 1110043 | 119754 | 0.37 | 7.1E-01 | 0 |
| CPNE1 - Copine-1                                                                    | 1   | 876843 | 876842  | 876842 | 0.37 | 7.1E-01 | 0 |
| Alkaline phosphatase (at exam 2, GEE, adjusted for multivariable)                   | 2   | 816666 | 933526  | 699807 | 0.37 | 7.1E-01 | 0 |
| Vascular endothelial growth factor                                                  | 2   | 816755 | 1170288 | 463223 | 0.38 | 7.1E-01 | 0 |
| Total cholesterol in large VLDL                                                     | 11  | 765925 | 919409  | 116974 | 0.38 | 7.1E-01 | 0 |
| CD32 on mDC                                                                         | 1   | 883748 | 883748  | 883748 | 0.38 | 7.1E-01 | 0 |
| Serum total cholesterol                                                             | 10  | 757501 | 1112504 | 143176 | 0.38 | 7.1E-01 | 0 |
| Male-specific factors - Hair/balding pattern: Pattern 4                             | 145 | 703688 | 1127210 | 143498 | 0.38 | 7.0E-01 | 0 |
| Isoleucine                                                                          | 2   | 824168 | 1228768 | 419568 | 0.38 | 7.0E-01 | 0 |
| Average weekly champagne plus white wine intake                                     | 11  | 764545 | 1211046 | 454174 | 0.38 | 7.0E-01 | 0 |
| CAPG - Macrophage-capping protein                                                   | 1   | 891645 | 891645  | 891645 | 0.39 | 7.0E-01 | 0 |
| TIMP3 - Metalloproteinase inhibitor 3                                               | 1   | 888365 | 888365  | 888365 | 0.39 | 7.0E-01 | 0 |
| Illnesses of father: Alzheimer's disease/dementia                                   | 1   | 889053 | 889053  | 889053 | 0.39 | 7.0E-01 | 0 |
| Splenium of corpus callosum radial diffusivities                                    | 8   | 768704 | 1355371 | 553884 | 0.39 | 7.0E-01 | 0 |
| :::X-10510                                                                          | 3   | 816268 | 938858  | 810763 | 0.39 | 7.0E-01 | 0 |
| LGALS3BP - Galectin-3-binding protein                                               | 1   | 879690 | 879690  | 879690 | 0.39 | 7.0E-01 | 0 |
| CD4:%Treg(39+73+)                                                                   | 1   | 882988 | 882988  | 882988 | 0.39 | 7.0E-01 | 0 |
| Amino acid::Tryptophan metabolism::tryptophan betaine                               | 2   | 826493 | 979168  | 673818 | 0.39 | 6.9E-01 | 0 |

|                                                                                          |     |        |         |        |      |         |   |
|------------------------------------------------------------------------------------------|-----|--------|---------|--------|------|---------|---|
| Total protein                                                                            | 24  | 743341 | 963183  | 392371 | 0.39 | 6.9E-01 | 0 |
| Left cerebellum exterior                                                                 | 13  | 763213 | 1305810 | 51303  | 0.40 | 6.9E-01 | 0 |
| Weight change compared with 1 year ago                                                   | 1   | 889053 | 889053  | 889053 | 0.40 | 6.9E-01 | 0 |
| Drugs for peptic ulcer and gastro-oesophageal reflux disease (GORD)                      | 5   | 795498 | 1178155 | 66035  | 0.40 | 6.9E-01 | 0 |
| Cannabis use                                                                             | 4   | 787915 | 1245809 | 353908 | 0.40 | 6.9E-01 | 0 |
| Mean low-density lipoprotein cholesterol from exam 1-7 (GEE, adjusted for multivariable) | 2   | 836973 | 961274  | 712671 | 0.40 | 6.9E-01 | 0 |
| Neck Section Modulus (GEE, adjusted for multivariable)                                   | 1   | 896600 | 896600  | 896600 | 0.40 | 6.9E-01 | 0 |
| Body of corpus callosum fractional anisotropy                                            | 3   | 819578 | 883061  | 561786 | 0.40 | 6.9E-01 | 0 |
| ::::X-11483                                                                              | 1   | 889695 | 889695  | 889695 | 0.40 | 6.9E-01 | 0 |
| ::::X-14625                                                                              | 1   | 892930 | 892930  | 892930 | 0.40 | 6.9E-01 | 0 |
| PGC cross disorder                                                                       | 4   | 799226 | 1225639 | 300538 | 0.41 | 6.9E-01 | 0 |
| 25-Hydroxyvitamin D level                                                                | 20  | 747458 | 986733  | 293376 | 0.41 | 6.8E-01 | 0 |
| Antisocial behavior (female)                                                             | 2   | 830614 | 1216454 | 444773 | 0.41 | 6.8E-01 | 0 |
| MMSE score (at exam 7, GEE, adjusted for age)                                            | 12  | 762891 | 1060904 | 241497 | 0.41 | 6.8E-01 | 0 |
| Mean total cholesterol from exam 1-7 (GEE, adjusted for multivariable)                   | 2   | 836973 | 961274  | 712671 | 0.41 | 6.8E-01 | 0 |
| Diagnoses - secondary ICD10: E11 Type 2 diabetes mellitus                                | 39  | 732540 | 1086393 | 299993 | 0.42 | 6.8E-01 | 0 |
| Genetic generalized epilepsy                                                             | 1   | 903535 | 903535  | 903535 | 0.42 | 6.8E-01 | 0 |
| Osteoarthritis of hip                                                                    | 28  | 739114 | 1045994 | 187140 | 0.42 | 6.8E-01 | 0 |
| Superior corona radiata mean diusivities                                                 | 2   | 835703 | 905801  | 765604 | 0.42 | 6.8E-01 | 0 |
| Phospholipids in very small VLDL                                                         | 14  | 761860 | 1037454 | 170611 | 0.42 | 6.8E-01 | 0 |
| Digalactosylation                                                                        | 6   | 786509 | 1178976 | 574811 | 0.42 | 6.7E-01 | 0 |
| Peptide::Dipeptide::X-14189--leucylalanine                                               | 2   | 843853 | 924395  | 763310 | 0.42 | 6.7E-01 | 0 |
| Anxiety disorder (factor score)                                                          | 1   | 903160 | 903160  | 903160 | 0.43 | 6.7E-01 | 0 |
| LDL diameter                                                                             | 5   | 805883 | 955163  | 395798 | 0.43 | 6.7E-01 | 0 |
| CST5 - Cystatin-D                                                                        | 1   | 897198 | 897198  | 897198 | 0.43 | 6.7E-01 | 0 |
| Treatment/medication code: ramipril                                                      | 3   | 826673 | 1222518 | 610704 | 0.43 | 6.7E-01 | 0 |
| Posterior limb of internal capsule mean diusivities                                      | 3   | 838300 | 1088341 | 628503 | 0.43 | 6.7E-01 | 0 |
| Superior corona radiata radial diusivities                                               | 4   | 800633 | 912428  | 524465 | 0.43 | 6.7E-01 | 0 |
| CA6 - Carbonic anhydrase 6                                                               | 1   | 910498 | 910498  | 910498 | 0.43 | 6.7E-01 | 0 |
| Visceral sdipose tissue volume (adjusted for BMI)                                        | 4   | 799906 | 1192394 | 394419 | 0.43 | 6.7E-01 | 0 |
| Vitiligo                                                                                 | 30  | 740455 | 1176916 | 116180 | 0.43 | 6.7E-01 | 0 |
| High-density lipoprotein cholesterol (at exam 1, GEE, adjusted for age and sex)          | 1   | 902585 | 902585  | 902585 | 0.43 | 6.7E-01 | 0 |
| Peptide::gamma-glutamyl::gamma-glutamylglutamine                                         | 2   | 849843 | 1241605 | 458081 | 0.43 | 6.6E-01 | 0 |
| Number of sexual partners                                                                | 72  | 721611 | 1162502 | 188661 | 0.44 | 6.6E-01 | 0 |
| MAPKAPK2 - MAP kinase-activated protein kinase 2                                         | 2   | 852759 | 1017141 | 688377 | 0.44 | 6.6E-01 | 0 |
| Estimated glomerular filtration rate based on serum creatinine                           | 105 | 714693 | 1015240 | 271088 | 0.44 | 6.6E-01 | 0 |
| Alcohol intake frequency                                                                 | 70  | 724966 | 1125026 | 129270 | 0.44 | 6.6E-01 | 0 |
| MMSE score (at exam 5, GEE, adjusted for age)                                            | 11  | 778853 | 1040979 | 695891 | 0.44 | 6.6E-01 | 0 |
| Triglycerides (at exam 1, GEE, adjusted for multivariable)                               | 1   | 913278 | 913278  | 913278 | 0.44 | 6.6E-01 | 0 |
| HDL diameter                                                                             | 8   | 786835 | 1110696 | 567870 | 0.44 | 6.6E-01 | 0 |
| Vitiligo (early onset)                                                                   | 1   | 922435 | 922435  | 922435 | 0.44 | 6.6E-01 | 0 |
| APOB - Apolipoprotein B                                                                  | 1   | 916168 | 916167  | 916167 | 0.45 | 6.6E-01 | 0 |
| Fasting glucose main effect                                                              | 16  | 762186 | 1391916 | 191450 | 0.45 | 6.6E-01 | 0 |

|                                                                                                |     |        |         |        |      |         |   |
|------------------------------------------------------------------------------------------------|-----|--------|---------|--------|------|---------|---|
| Concentration of very large HDL particles                                                      | 7   | 797550 | 1177365 | 584506 | 0.45 | 6.5E-01 | 0 |
| POSTN - Periostin                                                                              | 1   | 911180 | 911180  | 911180 | 0.45 | 6.5E-01 | 0 |
| Illnesses of father: Prostate cancer                                                           | 3   | 842773 | 1055566 | 566590 | 0.45 | 6.5E-01 | 0 |
| Cancer (GEE, adjusted for multivariable)                                                       | 1   | 920393 | 920392  | 920392 | 0.45 | 6.5E-01 | 0 |
| Lipid::Lysolipid::1-palmitoylglycerophosphoethanolamine                                        | 1   | 925430 | 925430  | 925430 | 0.45 | 6.5E-01 | 0 |
| Positive affect (MA GWAMA)                                                                     | 82  | 720200 | 1165619 | 175515 | 0.45 | 6.5E-01 | 0 |
| Platelet derived growth factor BB                                                              | 3   | 836653 | 1103279 | 483783 | 0.45 | 6.5E-01 | 0 |
| Hypertension                                                                                   | 1   | 925610 | 925610  | 925610 | 0.46 | 6.5E-01 | 0 |
| Genu of corpus callosum radial diuivities                                                      | 4   | 807954 | 1008323 | 699594 | 0.46 | 6.5E-01 | 0 |
| Cancer (GEE, adjusted for age and sex)                                                         | 1   | 920393 | 920392  | 920392 | 0.46 | 6.5E-01 | 0 |
| Sum neutrophil eosinophil count (three-way meta)                                               | 102 | 718523 | 1201344 | 155431 | 0.46 | 6.5E-01 | 0 |
| GFRA1 - GDNF family receptor alpha-1                                                           | 2   | 855804 | 1020434 | 691173 | 0.46 | 6.4E-01 | 0 |
| Diagnoses - main ICD10: I25 Chronic ischemic heart disease                                     | 25  | 755635 | 1079455 | 453870 | 0.46 | 6.4E-01 | 0 |
| Femoral Neck Length (GEE, adjusted for multivariable)                                          | 3   | 848208 | 928820  | 634066 | 0.46 | 6.4E-01 | 0 |
| Cingulum (hippocampus) mean diuivities                                                         | 1   | 925098 | 925098  | 925098 | 0.46 | 6.4E-01 | 0 |
| Diagnoses - secondary ICD10: J45 Asthma                                                        | 21  | 760445 | 1105033 | 303590 | 0.46 | 6.4E-01 | 0 |
| Ischemic stroke                                                                                | 1   | 928078 | 928078  | 928078 | 0.46 | 6.4E-01 | 0 |
| Lipid::Lysolipid::1-oleoylglycerophosphoethanolamine                                           | 1   | 925430 | 925430  | 925430 | 0.46 | 6.4E-01 | 0 |
| PCSK7 - Proprotein convertase subtilisin/kexin type 7                                          | 1   | 922308 | 922308  | 922308 | 0.47 | 6.4E-01 | 0 |
| Beta nerve growth factor                                                                       | 1   | 928360 | 928360  | 928360 | 0.47 | 6.4E-01 | 0 |
| Epworth Sleepiness Scale (GEE, adjusted for age, sex, BMI, usual sleep duration and additional | 2   | 856394 | 936916  | 775872 | 0.47 | 6.4E-01 | 0 |
| Concentration of large VLDL particles                                                          | 8   | 792240 | 1008001 | 391314 | 0.47 | 6.4E-01 | 0 |
| Phenylalanine                                                                                  | 2   | 854445 | 913310  | 795580 | 0.47 | 6.4E-01 | 0 |
| Sum basophil neutrophil count (three-way meta)                                                 | 100 | 718523 | 1184096 | 110826 | 0.47 | 6.4E-01 | 0 |
| Total cholesterol (at exam 2, GEE, adjusted for age and sex)                                   | 4   | 816515 | 998514  | 616188 | 0.47 | 6.4E-01 | 0 |
| IL25 - Interleukin-25                                                                          | 1   | 923305 | 923305  | 923305 | 0.47 | 6.4E-01 | 0 |
| Lipid::Carnitine metabolism::octanoylcarnitine                                                 | 3   | 852333 | 1008056 | 695191 | 0.47 | 6.4E-01 | 0 |
| Vitamin D plasma 25(OH)-D (at exam 6 or 7, GEE, adjusted for age and sex)                      | 1   | 928385 | 928385  | 928385 | 0.47 | 6.4E-01 | 0 |
| Worry/vulnerability factors                                                                    | 13  | 782163 | 1343513 | 551685 | 0.48 | 6.3E-01 | 0 |
| Left ventricular internal dimension in diastole                                                | 3   | 853988 | 1185196 | 800129 | 0.48 | 6.3E-01 | 0 |
| Total-body less head BMD and total body lean mass (bivariate meta-analysis)                    | 9   | 796800 | 1004520 | 666668 | 0.48 | 6.3E-01 | 0 |
| Age at menopause                                                                               | 42  | 739396 | 1113224 | 399028 | 0.48 | 6.3E-01 | 0 |
| Diagnoses - secondary ICD10: K21 Gastro-esophageal reflux disease                              | 1   | 940400 | 940400  | 940400 | 0.48 | 6.3E-01 | 0 |
| AMN - Protein amnionless                                                                       | 1   | 938475 | 938475  | 938475 | 0.48 | 6.3E-01 | 0 |
| ::::X-03094                                                                                    | 5   | 818555 | 1317188 | 83239  | 0.48 | 6.3E-01 | 0 |
| Neck Section Modulus (GEE, female, adjusted for multivariable)                                 | 1   | 940688 | 940688  | 940688 | 0.48 | 6.3E-01 | 0 |
| Illnesses of siblings: Heart disease                                                           | 3   | 851270 | 1019795 | 775553 | 0.48 | 6.3E-01 | 0 |
| Crohn's Disease                                                                                | 142 | 712213 | 1132919 | 347002 | 0.48 | 6.3E-01 | 0 |
| Cingulum (cingulate gyrus) fractional anisotropy                                               | 4   | 818978 | 942934  | 579343 | 0.48 | 6.3E-01 | 0 |
| Superior longitudinal fasciculus radial diuivities                                             | 4   | 818631 | 1036972 | 622792 | 0.48 | 6.3E-01 | 0 |
| Energy::Krebs cycle::malate                                                                    | 1   | 938865 | 938865  | 938865 | 0.49 | 6.3E-01 | 0 |
| Worry subcluster                                                                               | 59  | 731810 | 1311698 | 112775 | 0.49 | 6.3E-01 | 0 |
| Anxiety/tension factors                                                                        | 13  | 782163 | 1343513 | 551685 | 0.49 | 6.2E-01 | 0 |



|                                                                          |     |        |         |        |      |         |   |
|--------------------------------------------------------------------------|-----|--------|---------|--------|------|---------|---|
| MMSE score (at exam 7, GEE, adjusted for multivariable)                  | 2   | 858548 | 1016168 | 700928 | 0.49 | 6.2E-01 | 0 |
| MAPKAPK3 - MAP kinase-activated protein kinase 3                         | 1   | 950015 | 950015  | 950015 | 0.49 | 6.2E-01 | 0 |
| ANXA1 - Annexin A1                                                       | 1   | 928565 | 928565  | 928565 | 0.49 | 6.2E-01 | 0 |
| Free cholesterol in small VLDL                                           | 11  | 797550 | 919060  | 423210 | 0.49 | 6.2E-01 | 0 |
| Lipid::Sterol, Steroid::cholesterol                                      | 1   | 946783 | 946783  | 946783 | 0.49 | 6.2E-01 | 0 |
| Neck Section Modulus (GEE, female, adjusted for age)                     | 1   | 940688 | 940688  | 940688 | 0.49 | 6.2E-01 | 0 |
| Chronic kidney disease (at exam 7, GEE, adjusted for multivariable)      | 12  | 789218 | 1085388 | 477651 | 0.50 | 6.2E-01 | 0 |
| Left ventricular internal dimension in systole                           | 3   | 853988 | 970369  | 800129 | 0.50 | 6.2E-01 | 0 |
| Low cholesterol lipoprotein                                              | 14  | 775933 | 1169944 | 439964 | 0.50 | 6.2E-01 | 0 |
| Free cholesterol in medium VLDL                                          | 7   | 818555 | 1096754 | 297742 | 0.50 | 6.2E-01 | 0 |
| Heart rate recovery at 10 secnds                                         | 16  | 776683 | 1143033 | 108092 | 0.50 | 6.2E-01 | 0 |
| HOMA-B                                                                   | 4   | 826464 | 1353527 | 275448 | 0.50 | 6.2E-01 | 0 |
| PROC - Vitamin K-dependent protein C                                     | 1   | 950673 | 950673  | 950673 | 0.50 | 6.2E-01 | 0 |
| ::::X-12844                                                              | 4   | 824953 | 1259806 | 359058 | 0.50 | 6.2E-01 | 0 |
| Heart rate recovery at 30 secnds                                         | 21  | 767923 | 904060  | 115768 | 0.51 | 6.1E-01 | 0 |
| Phospholipids in large VLDL                                              | 7   | 818555 | 919409  | 314614 | 0.51 | 6.1E-01 | 0 |
| Anterior corona radiata fractional anisotropy                            | 7   | 819578 | 848623  | 377580 | 0.51 | 6.1E-01 | 0 |
| Total lipids in chylomicrons and extremely large VLDL                    | 7   | 818555 | 979404  | 327468 | 0.51 | 6.1E-01 | 0 |
| Central corneal thickness                                                | 29  | 759835 | 1053798 | 422213 | 0.51 | 6.1E-01 | 0 |
| Adrenergics, inhalants                                                   | 40  | 751529 | 1001276 | 318350 | 0.52 | 6.0E-01 | 0 |
| Pericardial adipose tissue volume (adjusted for height and weight, male) | 1   | 958743 | 958742  | 958742 | 0.52 | 6.0E-01 | 0 |
| Extreme obesity (childhood)                                              | 2   | 876113 | 939594  | 812631 | 0.52 | 6.0E-01 | 0 |
| MIF - Macrophage migration inhibitory factor                             | 1   | 950015 | 950015  | 950015 | 0.52 | 6.0E-01 | 0 |
| Age when periods started (menarche) (female)                             | 184 | 712341 | 1122476 | 196464 | 0.52 | 6.0E-01 | 0 |
| Pericardial adipose tissue volume (male)                                 | 1   | 958743 | 958742  | 958742 | 0.52 | 6.0E-01 | 0 |
| Asthma (adult-onset)                                                     | 25  | 767645 | 908280  | 347450 | 0.52 | 6.0E-01 | 0 |
| Worry too long after embarrassment                                       | 22  | 767135 | 1021552 | 138923 | 0.52 | 6.0E-01 | 0 |
| IL1A - Interleukin-1 alpha                                               | 1   | 950015 | 950015  | 950015 | 0.52 | 6.0E-01 | 0 |
| Total lipids in large LDL                                                | 14  | 787651 | 1175429 | 377491 | 0.52 | 6.0E-01 | 0 |
| Total lipids in large VLDL                                               | 7   | 818555 | 979404  | 478593 | 0.53 | 6.0E-01 | 0 |
| Peptide::Dipeptide::X-14304--leucylalanine                               | 2   | 874809 | 939873  | 809744 | 0.53 | 6.0E-01 | 0 |
| Extreme Waist-hip ratio (adjusted for BMI)                               | 2   | 880005 | 965983  | 794028 | 0.53 | 5.9E-01 | 0 |
| Cerebrospinal fluid levels of amyloid-beta 1-42                          | 1   | 973443 | 973442  | 973442 | 0.53 | 5.9E-01 | 0 |
| Triglyceride                                                             | 27  | 765925 | 1023714 | 152967 | 0.53 | 5.9E-01 | 0 |
| SOD2 - Superoxide dismutase [Mn], mitochondrial                          | 1   | 962338 | 962338  | 962338 | 0.53 | 5.9E-01 | 0 |
| Probable major depressive disorder                                       | 1   | 966988 | 966988  | 966988 | 0.54 | 5.9E-01 | 0 |
| Phospholipids in small VLDL                                              | 9   | 818555 | 949067  | 514640 | 0.54 | 5.9E-01 | 0 |
| ::::X-12094                                                              | 1   | 967390 | 967390  | 967390 | 0.54 | 5.9E-01 | 0 |
| Infantile hypertrophic pyloric stenosis                                  | 6   | 818603 | 1039886 | 334516 | 0.54 | 5.9E-01 | 0 |
| Phospholipids in very large VLDL                                         | 7   | 836050 | 1068231 | 792240 | 0.54 | 5.9E-01 | 0 |
| Age at menopause (last menstrual period) (female)                        | 59  | 741363 | 1167133 | 120117 | 0.54 | 5.9E-01 | 0 |
| HCK - Tyrosine-protein kinase HCK                                        | 1   | 969995 | 969995  | 969995 | 0.54 | 5.9E-01 | 0 |
| Cingulum (cingulate gyrus) mean diuivities                               | 3   | 875653 | 1126300 | 670906 | 0.54 | 5.9E-01 | 0 |

|                                                                                |    |        |         |        |      |         |   |
|--------------------------------------------------------------------------------|----|--------|---------|--------|------|---------|---|
| Fluid intelligence test - FI7 : synonym                                        | 1  | 961218 | 961217  | 961217 | 0.54 | 5.9E-01 | 0 |
| Sagittal diameter by CT (GEE, adjusted for age, sex, smoking and menopause)    | 1  | 969028 | 969028  | 969028 | 0.54 | 5.9E-01 | 0 |
| SLAMF7 - SLAM family member 7                                                  | 1  | 969403 | 969403  | 969403 | 0.54 | 5.9E-01 | 0 |
| Non-cancer illness code, self-reported: migraine                               | 13 | 800740 | 1061773 | 406448 | 0.55 | 5.8E-01 | 0 |
| Triglycerides in large VLDL                                                    | 6  | 824461 | 959667  | 532741 | 0.55 | 5.8E-01 | 0 |
| D-dimer (at exam 6, GEE, adjusted for age and sex)                             | 3  | 886028 | 988078  | 868826 | 0.55 | 5.8E-01 | 0 |
| GRAP2 - GRB2-related adapter protein 2                                         | 1  | 982440 | 982440  | 982440 | 0.55 | 5.8E-01 | 0 |
| Triglycerides in small HDL                                                     | 9  | 818555 | 1118528 | 765925 | 0.55 | 5.8E-01 | 0 |
| Concentration of large LDL particles                                           | 14 | 787651 | 1175429 | 377491 | 0.55 | 5.8E-01 | 0 |
| Dysmenorrhea (quality of life impact)                                          | 1  | 977578 | 977578  | 977578 | 0.55 | 5.8E-01 | 0 |
| Phospholipids in chylomicrons and extremely large VLDL                         | 6  | 827303 | 966318  | 800503 | 0.56 | 5.8E-01 | 0 |
| Nucleotide::NAD metabolism::X-12095--N1-methyl-3-pyridone-4-carboxamide        | 1  | 967390 | 967390  | 967390 | 0.56 | 5.8E-01 | 0 |
| Diagnoses - main ICD10: R31 Hematuria                                          | 4  | 841234 | 1251904 | 394397 | 0.56 | 5.8E-01 | 0 |
| Alkaline phosphatase                                                           | 24 | 772270 | 1046054 | 188651 | 0.56 | 5.8E-01 | 0 |
| Ever highly irritable/argumentative for 2 days                                 | 3  | 886200 | 1003341 | 660144 | 0.56 | 5.7E-01 | 0 |
| Loneliness (MTAG)                                                              | 13 | 802985 | 1398988 | 70786  | 0.56 | 5.7E-01 | 0 |
| Plasma Lipoprotein A level                                                     | 9  | 824590 | 1055170 | 128412 | 0.56 | 5.7E-01 | 0 |
| White matter hyperintensity volume (GEE, adjusted for age and sex)             | 3  | 890213 | 1139348 | 808465 | 0.56 | 5.7E-01 | 0 |
| Lipid::Long chain fatty acid::arachidonate (20:4n6)                            | 1  | 978718 | 978717  | 978717 | 0.57 | 5.7E-01 | 0 |
| PDGFRB - Platelet-derived growth factor receptor beta                          | 1  | 979123 | 979123  | 979123 | 0.57 | 5.7E-01 | 0 |
| TYK2 - Non-receptor tyrosine-protein kinase TYK2                               | 1  | 982440 | 982440  | 982440 | 0.57 | 5.7E-01 | 0 |
| Myeloid white cell count (three-way meta)                                      | 97 | 730250 | 1219753 | 129958 | 0.57 | 5.7E-01 | 0 |
| Total lipids in small VLDL                                                     | 11 | 818555 | 949054  | 430043 | 0.57 | 5.7E-01 | 0 |
| White matter hyperintensity volume (GEE, adjusted for multivariable)           | 3  | 890213 | 1139348 | 808465 | 0.57 | 5.7E-01 | 0 |
| MSR1 - Macrophage scavenger receptor types I and II                            | 1  | 982440 | 982440  | 982440 | 0.58 | 5.7E-01 | 0 |
| Number of treatments/medications taken                                         | 47 | 754590 | 1160480 | 264317 | 0.58 | 5.6E-01 | 0 |
| ABL2 - Abelson tyrosine-protein kinase 2                                       | 1  | 982440 | 982440  | 982440 | 0.58 | 5.6E-01 | 0 |
| 18:2, linoleic acid (LA)                                                       | 11 | 818555 | 1073441 | 216544 | 0.58 | 5.6E-01 | 0 |
| Triglycerides in very small VLDL                                               | 11 | 818555 | 1041381 | 296602 | 0.58 | 5.6E-01 | 0 |
| Alcohol usually taken with meals                                               | 13 | 809173 | 1017803 | 70284  | 0.59 | 5.6E-01 | 0 |
| Neck Section Modulus (GEE, male, adjusted for age)                             | 2  | 906885 | 1036931 | 776839 | 0.59 | 5.6E-01 | 0 |
| Antithrombotic agents                                                          | 9  | 833758 | 1082570 | 385130 | 0.59 | 5.6E-01 | 0 |
| VWF - von Willebrand factor                                                    | 1  | 986643 | 986642  | 986642 | 0.59 | 5.6E-01 | 0 |
| Low-density lipoprotein cholesterol (at exam 6, GEE, adjusted for age and sex) | 1  | 989188 | 989188  | 989188 | 0.59 | 5.6E-01 | 0 |
| Ever had prostate specific antigen (PSA) test                                  | 3  | 895335 | 907265  | 760590 | 0.59 | 5.6E-01 | 0 |
| Total cholesterol in small VLDL                                                | 11 | 818555 | 999000  | 444793 | 0.59 | 5.6E-01 | 0 |
| STK17B - Serine/threonine-protein kinase 17B                                   | 1  | 982440 | 982440  | 982440 | 0.59 | 5.6E-01 | 0 |
| BCAR3 - Breast cancer anti-estrogen resistance protein 3                       | 1  | 982440 | 982440  | 982440 | 0.59 | 5.5E-01 | 0 |
| IL12RB1 - Interleukin-12 receptor subunit beta-1                               | 1  | 981160 | 981160  | 981160 | 0.59 | 5.5E-01 | 0 |
| PPA1 - Inorganic pyrophosphatase                                               | 1  | 991410 | 991410  | 991410 | 0.59 | 5.5E-01 | 0 |
| OCIAD1 - OCIA domain-containing protein 1                                      | 1  | 982440 | 982440  | 982440 | 0.59 | 5.5E-01 | 0 |
| Stem cell factor                                                               | 2  | 896879 | 1077596 | 716162 | 0.59 | 5.5E-01 | 0 |
| Sleep duration                                                                 | 9  | 832098 | 982820  | 98504  | 0.59 | 5.5E-01 | 0 |

|                                                                                   |     |         |         |         |      |         |   |
|-----------------------------------------------------------------------------------|-----|---------|---------|---------|------|---------|---|
| Lipid::Medium chain fatty acid::10-undecenoate (11:1n1)                           | 1   | 992923  | 992923  | 992923  | 0.59 | 5.5E-01 | 0 |
| Peptide::Dipeptide::aspartylphenylalanine                                         | 1   | 1004938 | 1004938 | 1004938 | 0.60 | 5.5E-01 | 0 |
| Small low-density lipoprotein by NMR (at exam 4, GEE, adjusted for multivariable) | 3   | 908985  | 1031613 | 859315  | 0.60 | 5.5E-01 | 0 |
| 22:6, docosahexaenoic acid (DHA)                                                  | 3   | 899838  | 1011653 | 696946  | 0.60 | 5.5E-01 | 0 |
| PR interval (cohort exam 11 offspring exam 1, GEE, adjusted for age nad RR)       | 3   | 907803  | 1028435 | 680969  | 0.60 | 5.5E-01 | 0 |
| Left parahippocampal                                                              | 3   | 909943  | 1133163 | 502112  | 0.60 | 5.5E-01 | 0 |
| Fasting plasma glucose (at exam 5, GEE, adjusted for age, sex and BMI)            | 3   | 902585  | 969401  | 503440  | 0.60 | 5.5E-01 | 0 |
| Treatment/medication code: ibuprofen                                              | 3   | 912318  | 962444  | 467493  | 0.61 | 5.4E-01 | 0 |
| ::::X-14086                                                                       | 1   | 1004938 | 1004938 | 1004938 | 0.61 | 5.4E-01 | 0 |
| Lipid::Sterol, Steroid::androsterone sulfate                                      | 2   | 914850  | 1052080 | 777620  | 0.61 | 5.4E-01 | 0 |
| Cerebellar vermal lobules I V                                                     | 14  | 807139  | 1032873 | 105391  | 0.61 | 5.4E-01 | 0 |
| Serum total triglycerides                                                         | 10  | 824461  | 934064  | 599834  | 0.62 | 5.4E-01 | 0 |
| Lipid::Lysolipid::1-arachidonoylglycerophosphocholine*                            | 3   | 918253  | 957725  | 903789  | 0.62 | 5.4E-01 | 0 |
| CSF                                                                               | 7   | 854105  | 914416  | 200127  | 0.62 | 5.4E-01 | 0 |
| Cholesterol esters in medium VLDL                                                 | 13  | 818555  | 1048933 | 485140  | 0.62 | 5.4E-01 | 0 |
| Menstrual pain medicine use                                                       | 1   | 1000075 | 1000075 | 1000075 | 0.62 | 5.4E-01 | 0 |
| Lipid::Lysolipid::1-linoleoylglycerophosphoethanolamine*                          | 2   | 907378  | 916404  | 898351  | 0.62 | 5.4E-01 | 0 |
| Glucose                                                                           | 4   | 863451  | 1014154 | 689373  | 0.62 | 5.4E-01 | 0 |
| Epworth Sleepiness Scale (GEE)                                                    | 1   | 1017438 | 1017438 | 1017438 | 0.62 | 5.3E-01 | 0 |
| Small low-density lipoprotein by NMR (at exam 4, GEE, adjusted for age and sex)   | 4   | 860539  | 972134  | 783952  | 0.62 | 5.3E-01 | 0 |
| Number of days/week of vigorous physical activity 10+ minutes                     | 10  | 824791  | 1006328 | 634146  | 0.62 | 5.3E-01 | 0 |
| QRS interval                                                                      | 8   | 833528  | 1174862 | 568435  | 0.62 | 5.3E-01 | 0 |
| Interleukin-16                                                                    | 2   | 916238  | 968164  | 864311  | 0.63 | 5.3E-01 | 0 |
| Morning person (binary)                                                           | 116 | 730095  | 1180721 | 106761  | 0.63 | 5.3E-01 | 0 |
| Total cerebral brain volume (GEE, adjusted for multivariable)                     | 1   | 1002018 | 1002017 | 1002017 | 0.63 | 5.3E-01 | 0 |
| Triglycerides in very large HDL                                                   | 10  | 823634  | 1163668 | 650053  | 0.63 | 5.3E-01 | 0 |
| Age started wearing glasses or contact lenses                                     | 100 | 738014  | 1074956 | 148191  | 0.63 | 5.3E-01 | 0 |
| Seen a psychiatrist for nerves, anxiety, tension or depression                    | 3   | 920673  | 1054678 | 483596  | 0.63 | 5.3E-01 | 0 |
| Triglycerides in small VLDL                                                       | 11  | 830368  | 1137843 | 490970  | 0.63 | 5.3E-01 | 0 |
| Eosinophil percentage of white cells (two-way meta)                               | 97  | 736083  | 1223408 | 122584  | 0.63 | 5.3E-01 | 0 |
| ESAM - Endothelial cell-selective adhesion molecule                               | 1   | 1006610 | 1006610 | 1006610 | 0.63 | 5.3E-01 | 0 |
| GFRA2 - GDNF family receptor alpha-2                                              | 1   | 1023148 | 1023148 | 1023148 | 0.64 | 5.2E-01 | 0 |
| Inter-trochanteric buckling ratio (GEE, female, adjussted for age)                | 1   | 1025960 | 1025960 | 1025960 | 0.64 | 5.2E-01 | 0 |
| Diagnoses - main ICD10: K40 Inguinal hernia                                       | 14  | 820809  | 1125520 | 73491   | 0.64 | 5.2E-01 | 0 |
| Inter-trochanteric buckling ratio (GEE, male, adjussted for multivariable)        | 1   | 1019215 | 1019215 | 1019215 | 0.64 | 5.2E-01 | 0 |
| Survival past average life expectancy (GEE, adjusted for birth-cohort)            | 1   | 1020063 | 1020063 | 1020063 | 0.65 | 5.2E-01 | 0 |
| Insomnia                                                                          | 14  | 814311  | 1289623 | 64540   | 0.65 | 5.2E-01 | 0 |
| 28 year time-averaged Fasting plasma glucose (GEE, adjusted for age and sex)      | 9   | 851625  | 1214860 | 104295  | 0.65 | 5.2E-01 | 0 |
| Resting heart rate                                                                | 290 | 711600  | 1123018 | 159015  | 0.65 | 5.2E-01 | 0 |
| EMR2 - EGF-like module-containing mucin-like hormone receptor-like 2              | 1   | 1038403 | 1038403 | 1038403 | 0.65 | 5.2E-01 | 0 |
| FN1 - Fibronectin Fragment 4                                                      | 1   | 1027838 | 1027838 | 1027838 | 0.65 | 5.1E-01 | 0 |
| Systemic Lupus Erythematosus                                                      | 61  | 756663  | 1285880 | 293270  | 0.65 | 5.1E-01 | 0 |
| Fractured/broken bones in last 5 years                                            | 13  | 825893  | 1057395 | 434027  | 0.65 | 5.1E-01 | 0 |

|                                                                                   |     |         |         |         |      |         |   |
|-----------------------------------------------------------------------------------|-----|---------|---------|---------|------|---------|---|
| Thyroid-stimulating hormone (female)                                              | 21  | 801673  | 1080473 | 576603  | 0.66 | 5.1E-01 | 0 |
| Neck Section Modulus (GEE, adjusted for age and sex)                              | 1   | 1036765 | 1036765 | 1036765 | 0.66 | 5.1E-01 | 0 |
| Nucleotide::Purine metabolism, (hypo)xanthine, inosine containing::hypoxanthine   | 1   | 1036650 | 1036650 | 1036650 | 0.66 | 5.1E-01 | 0 |
| Posterior corona radiata fractional anisotropy                                    | 2   | 922019  | 923558  | 920479  | 0.66 | 5.1E-01 | 0 |
| FN1 - Fibronectin Fragment 3                                                      | 1   | 1027838 | 1027838 | 1027838 | 0.66 | 5.1E-01 | 0 |
| Coronary artery disease and high-density lipoprotein cholesterol (bivariate)      | 144 | 725998  | 1125248 | 217187  | 0.66 | 5.1E-01 | 0 |
| Life satisfaction (MA GWAMA)                                                      | 32  | 779481  | 1198157 | 381741  | 0.66 | 5.1E-01 | 0 |
| Trunk-trunk fat ratio (male)                                                      | 15  | 822398  | 1220179 | 168480  | 0.66 | 5.1E-01 | 0 |
| FN1 - Fibronectin                                                                 | 2   | 929173  | 978505  | 879840  | 0.66 | 5.1E-01 | 0 |
| Short sleep                                                                       | 21  | 805503  | 1078588 | 91238   | 0.67 | 5.0E-01 | 0 |
| Resistin (GEE, adjusted for age, sex and BMI)                                     | 2   | 927399  | 1096913 | 757884  | 0.67 | 5.0E-01 | 0 |
| Social support - Leisure/social activities: Pub or social club                    | 17  | 818465  | 1284278 | 506602  | 0.67 | 5.0E-01 | 0 |
| Coronary artery disease and low-density lipoprotein cholesterol (bivariate)       | 133 | 730695  | 1139080 | 361015  | 0.67 | 5.0E-01 | 0 |
| Number of days/week of moderate physical activity 10+ minutes                     | 5   | 889053  | 1369603 | 558700  | 0.67 | 5.0E-01 | 0 |
| Shaft cross-sectional moment of inertia (GEE, female, adjusted for multivariable) | 2   | 932634  | 1174766 | 690502  | 0.67 | 5.0E-01 | 0 |
| Vitamin and mineral supplements: Multivitamins +/- minerals                       | 2   | 924765  | 1319770 | 529761  | 0.67 | 5.0E-01 | 0 |
| Glycoprotein acetyls, mainly a1Lacid glycoprotein                                 | 4   | 883811  | 1120143 | 617628  | 0.67 | 5.0E-01 | 0 |
| NKeff:%337+                                                                       | 1   | 1037885 | 1037885 | 1037885 | 0.67 | 5.0E-01 | 0 |
| Mouth/teeth dental problems: Dentures                                             | 30  | 784160  | 1066246 | 208581  | 0.67 | 5.0E-01 | 0 |
| GPC3 - Glypican-3                                                                 | 1   | 1028153 | 1028153 | 1028153 | 0.67 | 5.0E-01 | 0 |
| Granulocyte count (three-way meta)                                                | 102 | 737218  | 1216351 | 155431  | 0.67 | 5.0E-01 | 0 |
| Urinary albumin-to-creatinine ratio                                               | 2   | 929724  | 1058693 | 800754  | 0.67 | 5.0E-01 | 0 |
| Neck width (GEE, female, adjusted for multivariable)                              | 1   | 1025960 | 1025960 | 1025960 | 0.67 | 5.0E-01 | 0 |
| Neutrophil percentage of granulocytes (three-way meta)                            | 107 | 736083  | 1184711 | 138590  | 0.68 | 5.0E-01 | 0 |
| Coronary artery disease and total cholesterol (bivariate)                         | 135 | 730695  | 1120903 | 376863  | 0.68 | 5.0E-01 | 0 |
| Serum calcium (at exam 2, GEE, adjusted for age, sex and serum creatinine)        | 2   | 933483  | 1053635 | 813330  | 0.68 | 5.0E-01 | 0 |
| Hot drink temperature                                                             | 45  | 767540  | 1294605 | 72826   | 0.68 | 5.0E-01 | 0 |
| Concentration of IDL particles                                                    | 12  | 831980  | 1050478 | 304479  | 0.68 | 5.0E-01 | 0 |
| Fasting insulin                                                                   | 1   | 1031433 | 1031433 | 1031433 | 0.68 | 5.0E-01 | 0 |
| LRIG3 - Leucine-rich repeats and immunoglobulin-like domains protein 3            | 1   | 1039958 | 1039958 | 1039958 | 0.68 | 4.9E-01 | 0 |
| SPON1 - Spondin-1                                                                 | 1   | 1033753 | 1033753 | 1033753 | 0.68 | 4.9E-01 | 0 |
| OmegaL3 fatty acids                                                               | 5   | 899838  | 1045825 | 494055  | 0.69 | 4.9E-01 | 0 |
| :::X-12450                                                                        | 1   | 1043453 | 1043453 | 1043453 | 0.69 | 4.9E-01 | 0 |
| KLRK1 - NKG2-D type II integral membrane protein                                  | 1   | 1049338 | 1049338 | 1049338 | 0.69 | 4.9E-01 | 0 |
| :::X-12644                                                                        | 1   | 1045825 | 1045825 | 1045825 | 0.69 | 4.9E-01 | 0 |
| Anxiety - Ever worried more than most people would in similar situation           | 1   | 1052310 | 1052310 | 1052310 | 0.69 | 4.9E-01 | 0 |
| Thyroid-stimulating hormone                                                       | 39  | 778293  | 929274  | 498726  | 0.69 | 4.9E-01 | 0 |
| Age when last used oral contraceptive pill (female)                               | 1   | 1044205 | 1044205 | 1044205 | 0.70 | 4.9E-01 | 0 |
| Atrial natriuretic peptide (at exam 6, GEE, adjusted for multivariable)           | 1   | 1053973 | 1053973 | 1053973 | 0.70 | 4.9E-01 | 0 |
| EPHB6 - Ephrin type-B receptor 6                                                  | 1   | 1057895 | 1057895 | 1057895 | 0.70 | 4.9E-01 | 0 |
| Pericardial adipose tissue volume (adjusted for height and weight, female)        | 1   | 1051960 | 1051960 | 1051960 | 0.70 | 4.9E-01 | 0 |
| Nucleotide::Purine metabolism, guanine containing::N2,N2-dimethylguanosine        | 1   | 1060300 | 1060300 | 1060300 | 0.70 | 4.8E-01 | 0 |
| Histidine                                                                         | 4   | 894400  | 1058084 | 640250  | 0.70 | 4.8E-01 | 0 |

|                                                                                                        |     |         |         |         |      |         |   |
|--------------------------------------------------------------------------------------------------------|-----|---------|---------|---------|------|---------|---|
| Atrial Fibrillation                                                                                    | 103 | 740255  | 1119101 | 348511  | 0.70 | 4.8E-01 | 0 |
| Lipid::Carnitine metabolism::stearyl carnitine                                                         | 1   | 1051960 | 1051960 | 1051960 | 0.70 | 4.8E-01 | 0 |
| Fibrotic idiopathic interstitial pneumonias                                                            | 6   | 873483  | 1013531 | 497613  | 0.70 | 4.8E-01 | 0 |
| Immature fraction of reticulocytes (three-way meta)                                                    | 102 | 741580  | 1121044 | 240916  | 0.70 | 4.8E-01 | 0 |
| Hypothyroidism                                                                                         | 8   | 855323  | 1193860 | 369793  | 0.71 | 4.8E-01 | 0 |
| Posterior thalamic radiation (include optic radiation) axial diuivities                                | 2   | 938233  | 1255351 | 621114  | 0.71 | 4.8E-01 | 0 |
| Basophil count (three-way meta)                                                                        | 53  | 766478  | 1112530 | 96751   | 0.71 | 4.8E-01 | 0 |
| Eosinophil percentage of white cells (three-way meta)                                                  | 119 | 739293  | 1151696 | 124665  | 0.71 | 4.8E-01 | 0 |
| PDGFB - Platelet-derived growth factor subunit B                                                       | 1   | 1051143 | 1051143 | 1051143 | 0.71 | 4.8E-01 | 0 |
| Depressive symptoms (univariate)                                                                       | 53  | 767688  | 1141800 | 149863  | 0.71 | 4.8E-01 | 0 |
| MFGE8 - Lactadherin                                                                                    | 1   | 1055668 | 1055668 | 1055668 | 0.71 | 4.8E-01 | 0 |
| Periodontal complex trait 5 - Pg trait                                                                 | 2   | 943671  | 982687  | 904656  | 0.71 | 4.8E-01 | 0 |
| Triglyceride / High-density lipoprotein cholesterol ratio (at exam 1, GEE, adjusted for multivariable) | 1   | 1060918 | 1060918 | 1060918 | 0.71 | 4.8E-01 | 0 |
| Illnesses of siblings: Breast cancer                                                                   | 3   | 951490  | 1005368 | 501975  | 0.71 | 4.8E-01 | 0 |
| MAPK3 - Mitogen-activated protein kinase 3                                                             | 1   | 1054850 | 1054850 | 1054850 | 0.71 | 4.8E-01 | 0 |
| Alkaline phosphatase (at exam 2, GEE, adjusted for age and sex)                                        | 1   | 1050385 | 1050385 | 1050385 | 0.71 | 4.8E-01 | 0 |
| Xenobiotics::Benzoate metabolism::4-vinylphenol sulfate                                                | 1   | 1060360 | 1060360 | 1060360 | 0.71 | 4.8E-01 | 0 |
| Diagnoses - secondary ICD10: E78 Disorders of lipoprotein metabolism and other lipidemias              | 21  | 818555  | 1079695 | 214394  | 0.71 | 4.8E-01 | 0 |
| Facial attractiveness (male-coder, female samples)                                                     | 1   | 1052485 | 1052485 | 1052485 | 0.71 | 4.8E-01 | 0 |
| Reaction time test - Mean time to correctly identify matches                                           | 37  | 783943  | 1105768 | 73004   | 0.71 | 4.8E-01 | 0 |
| Total cholesterol in large HDL                                                                         | 10  | 853804  | 1051374 | 596580  | 0.71 | 4.8E-01 | 0 |
| High-density lipoprotein cholesterol                                                                   | 100 | 742574  | 1117746 | 230108  | 0.71 | 4.7E-01 | 0 |
| Heart rate recovery at 40 secnds                                                                       | 18  | 818834  | 1056066 | 381888  | 0.72 | 4.7E-01 | 0 |
| Heart rate recovery at 50 secnds                                                                       | 18  | 818834  | 1075021 | 381888  | 0.72 | 4.7E-01 | 0 |
| Diagnoses - secondary ICD10: K57 Diverticular disease of intestine                                     | 10  | 849669  | 1025939 | 205592  | 0.72 | 4.7E-01 | 0 |
| FAP - Seprase                                                                                          | 1   | 1065780 | 1065780 | 1065780 | 0.72 | 4.7E-01 | 0 |
| Sitting height                                                                                         | 659 | 700768  | 1127885 | 108483  | 0.72 | 4.7E-01 | 0 |
| DYNLRB1 - Dynein light chain roadblock-type 1                                                          | 1   | 1062243 | 1062243 | 1062243 | 0.72 | 4.7E-01 | 0 |
| CD209 - CD209 antigen                                                                                  | 1   | 1064218 | 1064218 | 1064218 | 0.72 | 4.7E-01 | 0 |
| METAP2 - Methionine aminopeptidase 2                                                                   | 1   | 1062243 | 1062243 | 1062243 | 0.73 | 4.7E-01 | 0 |
| Pulse rate (automated reading)                                                                         | 202 | 723834  | 1153959 | 196015  | 0.73 | 4.7E-01 | 0 |
| Corrected insulin response                                                                             | 3   | 960418  | 1036844 | 547583  | 0.73 | 4.6E-01 | 0 |
| CAT - Catalase                                                                                         | 2   | 953029  | 1052771 | 853287  | 0.73 | 4.6E-01 | 0 |
| :::X-13859                                                                                             | 2   | 956335  | 1410120 | 502550  | 0.74 | 4.6E-01 | 0 |
| MonoLunsaturated fatty acids                                                                           | 6   | 883811  | 988469  | 250732  | 0.74 | 4.6E-01 | 0 |
| Medication for cholesterol, blood pressure or diabetes: Blood pressure medication                      | 50  | 770760  | 1296984 | 288661  | 0.74 | 4.6E-01 | 0 |
| Xenobiotics::Xanthine metabolism::3-methylxanthine                                                     | 2   | 953061  | 958687  | 947436  | 0.74 | 4.6E-01 | 0 |
| Vitamin and mineral supplements: Vitamin E                                                             | 1   | 1067763 | 1067763 | 1067763 | 0.74 | 4.6E-01 | 0 |
| :::X-13435                                                                                             | 2   | 948226  | 1030456 | 865997  | 0.74 | 4.6E-01 | 0 |
| Asthma (random effect model)                                                                           | 18  | 825820  | 1147311 | 395958  | 0.74 | 4.6E-01 | 0 |
| Free thyroxine (FT4)                                                                                   | 18  | 822718  | 1196573 | 448066  | 0.75 | 4.6E-01 | 0 |
| Amino acid::Cysteine, methionine, SAM, taurine metabolism::X-11786--methylcysteine                     | 1   | 1075038 | 1075038 | 1075038 | 0.75 | 4.6E-01 | 0 |
| Age stopped smoking                                                                                    | 1   | 1076735 | 1076735 | 1076735 | 0.75 | 4.5E-01 | 0 |

|                                                                                                 |     |         |         |         |      |         |   |
|-------------------------------------------------------------------------------------------------|-----|---------|---------|---------|------|---------|---|
| Medication for cholesterol, blood pressure, diabetes, or take exogenous hormones: Cholesterol l | 27  | 809510  | 1178439 | 417343  | 0.75 | 4.5E-01 | 0 |
| ARSB - Arylsulfatase B                                                                          | 1   | 1073073 | 1073073 | 1073073 | 0.75 | 4.5E-01 | 0 |
| GNLY - Granulysin                                                                               | 1   | 1083200 | 1083200 | 1083200 | 0.75 | 4.5E-01 | 0 |
| FCER2 - Low affinity immunoglobulin epsilon Fc receptor                                         | 1   | 1080683 | 1080683 | 1080683 | 0.75 | 4.5E-01 | 0 |
| Eotaxin (CCL11)                                                                                 | 3   | 971555  | 1741565 | 500645  | 0.75 | 4.5E-01 | 0 |
| ::::X-08988                                                                                     | 3   | 972713  | 992768  | 888729  | 0.76 | 4.5E-01 | 0 |
| Mean low-density lipoprotein cholesterol fromexam 1-7 (FBAT, adjusted for multivariable)        | 1   | 1085575 | 1085575 | 1085575 | 0.76 | 4.5E-01 | 0 |
| Peptide::Polypeptide::bradykinin, des-arg(9)                                                    | 3   | 972068  | 1051986 | 846734  | 0.76 | 4.5E-01 | 0 |
| Body fat percentage                                                                             | 9   | 878838  | 1353228 | 382215  | 0.76 | 4.5E-01 | 0 |
| CMPK1 - UMP-CMP kinase                                                                          | 1   | 1089855 | 1089855 | 1089855 | 0.76 | 4.5E-01 | 0 |
| Xenobiotics::Xanthine metabolism::caffeine                                                      | 1   | 1082660 | 1082660 | 1082660 | 0.76 | 4.5E-01 | 0 |
| Platelet distribution width (three-way meta)                                                    | 113 | 742700  | 1092335 | 354748  | 0.76 | 4.4E-01 | 0 |
| Vigorous physical activity                                                                      | 5   | 930240  | 1133225 | 751333  | 0.77 | 4.4E-01 | 0 |
| Height SDS                                                                                      | 4   | 915130  | 1273486 | 454842  | 0.77 | 4.4E-01 | 0 |
| IL18R1 - Interleukin-18 receptor 1                                                              | 1   | 1088285 | 1088285 | 1088285 | 0.77 | 4.4E-01 | 0 |
| Guilty feelings (GUILT)                                                                         | 12  | 854145  | 965692  | 378950  | 0.77 | 4.4E-01 | 0 |
| Vascular/heart problems diagnosed by doctor: Angina                                             | 14  | 842514  | 1116611 | 321236  | 0.77 | 4.4E-01 | 0 |
| PTH1H - Parathyroid hormone-related protein                                                     | 1   | 1088588 | 1088588 | 1088588 | 0.77 | 4.4E-01 | 0 |
| CAMK1D - Calcium/calmodulin-dependent protein kinase type 1D                                    | 1   | 1089855 | 1089855 | 1089855 | 0.78 | 4.4E-01 | 0 |
| Lipid::Carnitine metabolism::carnitine                                                          | 16  | 838394  | 1061705 | 445802  | 0.78 | 4.4E-01 | 0 |
| Mental distress - Ever suffered mental distress preventing usual activities                     | 4   | 915493  | 1171415 | 523001  | 0.78 | 4.4E-01 | 0 |
| Left accumbens area                                                                             | 6   | 894191  | 1283032 | 204119  | 0.78 | 4.4E-01 | 0 |
| Cholesterol esters in large HDL                                                                 | 9   | 889053  | 946992  | 586548  | 0.78 | 4.4E-01 | 0 |
| IL5 - Interleukin-5                                                                             | 1   | 1089855 | 1089855 | 1089855 | 0.78 | 4.3E-01 | 0 |
| Mean low-density lipoprotein cholesterol fromexam 1-7 (FBAT, adjusted for age and sex)          | 1   | 1085575 | 1085575 | 1085575 | 0.78 | 4.3E-01 | 0 |
| Ejection fraction                                                                               | 2   | 970369  | 1028559 | 912178  | 0.78 | 4.3E-01 | 0 |
| Large high-density lipoprotein by NMR (at exam 4, GEE, adjusted for age and sex)                | 1   | 1086448 | 1086448 | 1086448 | 0.79 | 4.3E-01 | 0 |
| Impedance measures - Impedance of leg (right)                                                   | 458 | 709886  | 1144254 | 164261  | 0.79 | 4.3E-01 | 0 |
| PRSS27 - Serine protease 27                                                                     | 1   | 1089855 | 1089855 | 1089855 | 0.79 | 4.3E-01 | 0 |
| Diagnoses - secondary ICD10: I25 Chronic ischemic heart disease                                 | 15  | 851270  | 1309281 | 431029  | 0.79 | 4.3E-01 | 0 |
| WISP1 - WNT1-inducible-signaling pathway protein 1                                              | 1   | 1089855 | 1089855 | 1089855 | 0.79 | 4.3E-01 | 0 |
| Alcohol - Alcohol drinker status: Never                                                         | 6   | 898186  | 1250929 | 253162  | 0.79 | 4.3E-01 | 0 |
| Traumatic events - Felt loved as child                                                          | 3   | 976820  | 1178106 | 741361  | 0.79 | 4.3E-01 | 0 |
| Superior corona radiata mode of anisotropy                                                      | 3   | 982630  | 1103274 | 529679  | 0.79 | 4.3E-01 | 0 |
| SEMA3A - Semaphorin-3A                                                                          | 2   | 974509  | 1032182 | 916836  | 0.79 | 4.3E-01 | 0 |
| Other serious medical condition/disability (diagnosed by doctor)                                | 3   | 991493  | 1408148 | 546305  | 0.79 | 4.3E-01 | 0 |
| Left rostral anterior cingulate                                                                 | 4   | 922554  | 1338835 | 389791  | 0.79 | 4.3E-01 | 0 |
| Posterior corona radiata mode of anisotropy                                                     | 3   | 988860  | 1428891 | 754460  | 0.79 | 4.3E-01 | 0 |
| Red blood cell count                                                                            | 41  | 787993  | 1045680 | 245007  | 0.79 | 4.3E-01 | 0 |
| Femoral Neck BMD                                                                                | 36  | 796618  | 1241681 | 419366  | 0.79 | 4.3E-01 | 0 |
| ::::X-12798                                                                                     | 3   | 986395  | 1216105 | 523425  | 0.80 | 4.3E-01 | 0 |
| Diagnoses - secondary ICD10: Z95 Presence of cardiac and vascular implants and grafts           | 9   | 890533  | 1034870 | 678693  | 0.80 | 4.3E-01 | 0 |
| Lipid::Long chain fatty acid::myristoleate (14:1n5)                                             | 1   | 1113115 | 1113115 | 1113115 | 0.80 | 4.3E-01 | 0 |

|                                                                               |     |         |         |         |      |         |   |
|-------------------------------------------------------------------------------|-----|---------|---------|---------|------|---------|---|
| VLDL diameter                                                                 | 10  | 871420  | 1266549 | 782259  | 0.80 | 4.3E-01 | 0 |
| Lipid::Long chain fatty acid::margarate (17:0)                                | 1   | 1113115 | 1113115 | 1113115 | 0.80 | 4.3E-01 | 0 |
| Headaches for 3+ months                                                       | 4   | 924608  | 1075645 | 649757  | 0.80 | 4.2E-01 | 0 |
| Anti-inflammatory and antirheumatic products, non-steroids                    | 6   | 903869  | 1095183 | 247398  | 0.80 | 4.2E-01 | 0 |
| Pain type(s) experienced in last month: Back pain                             | 8   | 887976  | 998662  | 670678  | 0.80 | 4.2E-01 | 0 |
| Medication for pain relief, constipation, heartburn: Ibuprofen (e.g. Nurofen) | 7   | 912318  | 1326158 | 444606  | 0.80 | 4.2E-01 | 0 |
| Change in serum creatinine from exam 2 to 7 (GEE, adjusted for age and sex)   | 1   | 1110343 | 1110343 | 1110343 | 0.81 | 4.2E-01 | 0 |
| Corticospinal tract radial diuivities                                         | 5   | 948305  | 1178285 | 870740  | 0.81 | 4.2E-01 | 0 |
| Neck Width (GEE, adjusted for age and sex)                                    | 1   | 1100235 | 1100235 | 1100235 | 0.81 | 4.2E-01 | 0 |
| Posterior corona radiata radial diuivities                                    | 1   | 1113795 | 1113795 | 1113795 | 0.81 | 4.2E-01 | 0 |
| Lipid::Long chain fatty acid::palmitate (16:0)                                | 1   | 1113115 | 1113115 | 1113115 | 0.81 | 4.2E-01 | 0 |
| Birth length                                                                  | 2   | 988131  | 1337664 | 638598  | 0.82 | 4.1E-01 | 0 |
| Lipid::Long chain fatty acid::palmitoleate (16:1n7)                           | 1   | 1113115 | 1113115 | 1113115 | 0.82 | 4.1E-01 | 0 |
| Lipid::Medium chain fatty acid::5-dodecenoate (12:1n7)                        | 1   | 1113115 | 1113115 | 1113115 | 0.82 | 4.1E-01 | 0 |
| Free cholesterol                                                              | 9   | 899838  | 1045825 | 374945  | 0.82 | 4.1E-01 | 0 |
| Mean corpuscular hemoglobin (three-way meta)                                  | 145 | 738943  | 1129463 | 320653  | 0.82 | 4.1E-01 | 0 |
| Automobile speeding propensity                                                | 31  | 813355  | 1119875 | 538151  | 0.82 | 4.1E-01 | 0 |
| Lipid::Long chain fatty acid::nonadecanoate (19:0)                            | 1   | 1113115 | 1113115 | 1113115 | 0.82 | 4.1E-01 | 0 |
| OmegaL7 and L9 and saturated fatty acids                                      | 5   | 949068  | 1001603 | 818555  | 0.82 | 4.1E-01 | 0 |
| Lipid::Carnitine metabolism::3-dehydrocarnitine*                              | 2   | 980161  | 983278  | 977044  | 0.82 | 4.1E-01 | 0 |
| Triglycerides in very large VLDL                                              | 6   | 910661  | 1100963 | 779083  | 0.82 | 4.1E-01 | 0 |
| Lipid::Lysolipid::1-palmitoleoylglycerophosphocholine*                        | 1   | 1113115 | 1113115 | 1113115 | 0.83 | 4.1E-01 | 0 |
| Systolic Blood Pressure (automated reading)                                   | 209 | 730453  | 1122473 | 139634  | 0.83 | 4.1E-01 | 0 |
| APCS - Serum amyloid P-component                                              | 1   | 1116670 | 1116670 | 1116670 | 0.83 | 4.1E-01 | 0 |
| Free cholesterol in large HDL                                                 | 11  | 889053  | 1130259 | 606613  | 0.83 | 4.1E-01 | 0 |
| PLXNC1 - Plexin-C1                                                            | 1   | 1116948 | 1116948 | 1116948 | 0.83 | 4.1E-01 | 0 |
| Open-angle glaucoma (random-effect model)                                     | 37  | 806553  | 1044898 | 168601  | 0.83 | 4.1E-01 | 0 |
| Lymphocyte count (three-way meta)                                             | 114 | 749410  | 1111608 | 171860  | 0.83 | 4.0E-01 | 0 |
| Tyrosine                                                                      | 3   | 998693  | 1148823 | 528410  | 0.83 | 4.0E-01 | 0 |
| ADAMTS13 - A disintegrin and metalloproteinase with thrombospondin motifs 13  | 1   | 1120203 | 1120203 | 1120203 | 0.83 | 4.0E-01 | 0 |
| Age started hormone-replacement therapy (HRT) (female)                        | 7   | 922255  | 1408741 | 442714  | 0.84 | 4.0E-01 | 0 |
| Offspring birthweight (maternal)                                              | 7   | 924228  | 1220385 | 660623  | 0.84 | 4.0E-01 | 0 |
| KIR2DL4 - Killer cell immunoglobulin-like receptor 2DL4                       | 1   | 1123560 | 1123560 | 1123560 | 0.84 | 4.0E-01 | 0 |
| PPP3CA PPP3R1 - Calcineurin                                                   | 1   | 1120980 | 1120980 | 1120980 | 0.84 | 4.0E-01 | 0 |
| Agents acting on the renin-angiotensin system                                 | 145 | 741878  | 1136463 | 114163  | 0.84 | 4.0E-01 | 0 |
| KLK11 - Kallikrein-11                                                         | 1   | 1135173 | 1135173 | 1135173 | 0.85 | 4.0E-01 | 0 |
| High light scatter reticulocyte count (three-way meta)                        | 120 | 748144  | 1137496 | 190531  | 0.85 | 4.0E-01 | 0 |
| Total cholesterol in medium VLDL                                              | 10  | 883811  | 1099398 | 482911  | 0.85 | 4.0E-01 | 0 |
| Lipid::Lysolipid::1-stearoylglycerophosphoethanolamine                        | 1   | 1123655 | 1123655 | 1123655 | 0.85 | 4.0E-01 | 0 |
| SPARCL1 - SPARC-like protein 1                                                | 1   | 1135330 | 1135330 | 1135330 | 0.85 | 4.0E-01 | 0 |
| Triglycerides in chylomicrons and extremely large VLDL                        | 6   | 914148  | 1102706 | 303142  | 0.85 | 4.0E-01 | 0 |
| ::::X-08402                                                                   | 2   | 991993  | 1026720 | 957265  | 0.85 | 3.9E-01 | 0 |
| Hearing difficulty/problems with background noise                             | 25  | 830990  | 1001603 | 84269   | 0.85 | 3.9E-01 | 0 |

|                                                                                                           |     |         |         |         |      |         |   |
|-----------------------------------------------------------------------------------------------------------|-----|---------|---------|---------|------|---------|---|
| Concentration of medium VLDL particles                                                                    | 10  | 889718  | 1139916 | 625655  | 0.85 | 3.9E-01 | 0 |
| Guilty feelings                                                                                           | 13  | 881448  | 1264640 | 654675  | 0.86 | 3.9E-01 | 0 |
| Attention deficit hyperactivity disorder                                                                  | 11  | 892855  | 1212943 | 497249  | 0.86 | 3.9E-01 | 0 |
| Fractional shortening                                                                                     | 3   | 1017888 | 1075320 | 935938  | 0.86 | 3.9E-01 | 0 |
| Amino acid::Lysine metabolism::lysine                                                                     | 1   | 1137315 | 1137315 | 1137315 | 0.86 | 3.9E-01 | 0 |
| Fornix (cres) / Stria terminalis fractional anisotropy                                                    | 1   | 1138703 | 1138703 | 1138703 | 0.86 | 3.9E-01 | 0 |
| Comparative height size at age 10                                                                         | 457 | 713448  | 1114073 | 168115  | 0.86 | 3.9E-01 | 0 |
| Hip circumference (male)                                                                                  | 24  | 833950  | 1196401 | 458584  | 0.86 | 3.9E-01 | 0 |
| Amino acid::Tryptophan metabolism::tryptophan                                                             | 17  | 856618  | 1022270 | 525145  | 0.87 | 3.9E-01 | 0 |
| Illnesses of father: Heart disease                                                                        | 20  | 846216  | 1119437 | 363832  | 0.88 | 3.8E-01 | 0 |
| Sagittal diameter by CT (GEE, adjusted for age and sex)                                                   | 1   | 1127085 | 1127085 | 1127085 | 0.88 | 3.8E-01 | 0 |
| Percent predicted FEF25-75 for latest exam (GEE, adjusted for multiple covariates)                        | 4   | 950311  | 1321710 | 604336  | 0.88 | 3.8E-01 | 0 |
| Mental health - Illness, injury, bereavement, stress in last 2 years: Financial difficulties              | 3   | 1023008 | 1167565 | 854443  | 0.88 | 3.8E-01 | 0 |
| Beta blocking agents                                                                                      | 47  | 795763  | 1235108 | 491945  | 0.88 | 3.8E-01 | 0 |
| White matter hyperintensity volume (GEE, adjusted for multivariable with APOE)                            | 4   | 956653  | 1114440 | 849339  | 0.88 | 3.8E-01 | 0 |
| Lymphocyte percentage of white cells (two-way meta)                                                       | 83  | 768645  | 1144873 | 196233  | 0.88 | 3.8E-01 | 0 |
| Xenobiotics::Xanthine metabolism::1-methylxanthine                                                        | 1   | 1165490 | 1165490 | 1165490 | 0.88 | 3.8E-01 | 0 |
| Open-angle glaucoma (fixed-effect model)                                                                  | 41  | 806553  | 1059860 | 174462  | 0.88 | 3.8E-01 | 0 |
| Lipid::Medium chain fatty acid::pelargonate (9:0)                                                         | 1   | 1151108 | 1151108 | 1151108 | 0.88 | 3.8E-01 | 0 |
| Neuroticism general factor                                                                                | 46  | 796220  | 1230458 | 99213   | 0.88 | 3.8E-01 | 0 |
| CFHR5 - Complement factor H-related protein 5                                                             | 1   | 1151555 | 1151555 | 1151555 | 0.88 | 3.8E-01 | 0 |
| Anterior limb of internal capsule axial diuivities                                                        | 2   | 1013764 | 1256476 | 771052  | 0.89 | 3.8E-01 | 0 |
| Treatment/medication code: metformin                                                                      | 29  | 832305  | 1152513 | 428733  | 0.89 | 3.8E-01 | 0 |
| Left ventral DC                                                                                           | 6   | 933798  | 1184813 | 300938  | 0.89 | 3.7E-01 | 0 |
| Waist circumference (male, adjusted for BMI)                                                              | 37  | 813175  | 1190793 | 112308  | 0.89 | 3.7E-01 | 0 |
| Free cholesterol in large VLDL                                                                            | 8   | 919409  | 1118562 | 805398  | 0.89 | 3.7E-01 | 0 |
| Mean arterial pressure                                                                                    | 21  | 848045  | 1122783 | 263795  | 0.89 | 3.7E-01 | 0 |
| Total lipids in very small VLDL                                                                           | 12  | 883811  | 1050478 | 379486  | 0.89 | 3.7E-01 | 0 |
| Total cholesterol / High-density lipoprotein cholesterol ratio (at exam 6, GEE, adjusted for age and sex) | 2   | 1013751 | 1234507 | 792996  | 0.89 | 3.7E-01 | 0 |
| Concentration of large HDL particles                                                                      | 8   | 916110  | 1110696 | 760553  | 0.89 | 3.7E-01 | 0 |
| Acetoacetate                                                                                              | 2   | 1016169 | 1114976 | 917362  | 0.89 | 3.7E-01 | 0 |
| Lung cancer (adjusted for age)                                                                            | 3   | 1026643 | 1160283 | 980650  | 0.89 | 3.7E-01 | 0 |
| Mean corpuscular volume                                                                                   | 75  | 769498  | 1076421 | 198935  | 0.90 | 3.7E-01 | 0 |
| Lipid::Long chain fatty acid::X-12442--5,8-tetradecadienoate                                              | 1   | 1158020 | 1158020 | 1158020 | 0.90 | 3.7E-01 | 0 |
| Daytime napping                                                                                           | 7   | 946520  | 1066675 | 399486  | 0.90 | 3.7E-01 | 0 |
| Amino acid::Phenylalanine & tyrosine metabolism::phenylalanine                                            | 1   | 1148495 | 1148495 | 1148495 | 0.90 | 3.7E-01 | 0 |
| Concentration of very small VLDL particles                                                                | 12  | 883811  | 1070123 | 381858  | 0.90 | 3.7E-01 | 0 |
| Concentration of very large VLDL particles                                                                | 7   | 949068  | 1071718 | 669135  | 0.90 | 3.7E-01 | 0 |
| Amyotrophic lateral sclerosis                                                                             | 6   | 935901  | 1369743 | 171442  | 0.90 | 3.7E-01 | 0 |
| NRP1 - Neuropilin-1                                                                                       | 1   | 1147413 | 1147413 | 1147413 | 0.90 | 3.7E-01 | 0 |
| Amino acid::Glycine, serine and threonine metabolism::N-acetylglycine                                     | 2   | 1018876 | 1125942 | 911811  | 0.90 | 3.7E-01 | 0 |
| Total body BMD                                                                                            | 61  | 781903  | 1203333 | 339343  | 0.90 | 3.7E-01 | 0 |
| Anterior corona radiata mean diuivities                                                                   | 5   | 975900  | 1147350 | 466160  | 0.91 | 3.6E-01 | 0 |



|                                                                                        |     |         |         |         |      |         |   |
|----------------------------------------------------------------------------------------|-----|---------|---------|---------|------|---------|---|
| RGMA - Repulsive guidance molecule A                                                   | 1   | 1152513 | 1152513 | 1152513 | 0.91 | 3.6E-01 | 0 |
| Total lipids in very large VLDL                                                        | 7   | 949068  | 1071718 | 486283  | 0.91 | 3.6E-01 | 0 |
| GRN - Granulins                                                                        | 1   | 1152513 | 1152513 | 1152513 | 0.91 | 3.6E-01 | 0 |
| Total lipids in large HDL                                                              | 8   | 916110  | 1110696 | 760553  | 0.91 | 3.6E-01 | 0 |
| Noisy workplace                                                                        | 1   | 1164618 | 1164618 | 1164618 | 0.91 | 3.6E-01 | 0 |
| Left lingual                                                                           | 5   | 983585  | 1497278 | 94282   | 0.91 | 3.6E-01 | 0 |
| Open-angle glaucoma                                                                    | 6   | 935514  | 1277202 | 646358  | 0.91 | 3.6E-01 | 0 |
| Lipid::Lysolipid::1-arachidonoylglycerophosphoinositol*                                | 4   | 968436  | 1194688 | 708983  | 0.91 | 3.6E-01 | 0 |
| PPID - Peptidyl-prolyl cis-trans isomerase D                                           | 1   | 1163780 | 1163780 | 1163780 | 0.92 | 3.6E-01 | 0 |
| Waist-hip ratio (male, adjusted for BMI)                                               | 10  | 905414  | 1397184 | 692481  | 0.92 | 3.6E-01 | 0 |
| Lamb/mutton intake                                                                     | 18  | 867938  | 1034478 | 69147   | 0.92 | 3.6E-01 | 0 |
| Comparative body size at age 10                                                        | 172 | 740809  | 1201341 | 137596  | 0.92 | 3.6E-01 | 0 |
| Total cholesterol                                                                      | 121 | 755865  | 1162523 | 387173  | 0.92 | 3.6E-01 | 0 |
| Percent predicted FEF25-75/FVC for latest exam (GEE, adjusted for multiple covariates) | 4   | 969626  | 1350683 | 562959  | 0.92 | 3.6E-01 | 0 |
| Amino acid::Valine, leucine and isoleucine metabolism::leucine                         | 11  | 913785  | 1076463 | 599483  | 0.92 | 3.6E-01 | 0 |
| Worry too long after embarrassment (WORR-EMB)                                          | 18  | 861511  | 1050194 | 352567  | 0.92 | 3.6E-01 | 0 |
| Mean corpuscular volume (two-way meta)                                                 | 147 | 748590  | 1158769 | 158722  | 0.92 | 3.6E-01 | 0 |
| Number of self-reported non-cancer illnesses                                           | 36  | 817938  | 1414458 | 363062  | 0.92 | 3.6E-01 | 0 |
| Male pattern baldness (BOLT LMM non-infinitesimal mixed model)                         | 347 | 723280  | 1105631 | 179495  | 0.92 | 3.6E-01 | 0 |
| IMPDH2 - Inosine-5'-monophosphate dehydrogenase 2                                      | 1   | 1162328 | 1162328 | 1162328 | 0.92 | 3.6E-01 | 0 |
| Amino acid::Glycine, serine and threonine metabolism::betaine                          | 3   | 1036218 | 1223268 | 920481  | 0.92 | 3.6E-01 | 0 |
| Diagnoses - main ICD10: K80 Cholelithiasis                                             | 15  | 881008  | 1127658 | 80472   | 0.92 | 3.6E-01 | 0 |
| GPC5 - Glypican-5                                                                      | 1   | 1184868 | 1184868 | 1184868 | 0.93 | 3.5E-01 | 0 |
| CNTN2 - Contactin-2                                                                    | 1   | 1175578 | 1175578 | 1175578 | 0.93 | 3.5E-01 | 0 |
| GOT1 - Aspartate aminotransferase, cytoplasmic                                         | 1   | 1154430 | 1154430 | 1154430 | 0.93 | 3.5E-01 | 0 |
| Shaft Section Modulus (GEE, male, adjsusted for multivariable)                         | 1   | 1167850 | 1167850 | 1167850 | 0.93 | 3.5E-01 | 0 |
| Aspartate aminotransferase (at exam 2, GEE, adjusted for multivariable)                | 2   | 1036616 | 1174206 | 899027  | 0.94 | 3.5E-01 | 0 |
| Shaft Width (GEE, male, adjsusted for multivariable)                                   | 1   | 1167850 | 1167850 | 1167850 | 0.94 | 3.5E-01 | 0 |
| Impedance measures - Trunk fat mass                                                    | 428 | 717713  | 1141230 | 118706  | 0.94 | 3.5E-01 | 0 |
| Moderate to vigorous physical activity levels                                          | 19  | 873448  | 1319581 | 61573   | 0.94 | 3.5E-01 | 0 |
| Diverticular disease                                                                   | 61  | 789088  | 1138955 | 162788  | 0.94 | 3.5E-01 | 0 |
| Shaft cross-sectional moment of inertia (GEE, male, adjsusted for multivariable)       | 1   | 1167850 | 1167850 | 1167850 | 0.95 | 3.4E-01 | 0 |
| PEF                                                                                    | 266 | 730150  | 1167076 | 165896  | 0.95 | 3.4E-01 | 0 |
| Lymphocyte count (two-way meta)                                                        | 112 | 760833  | 1144230 | 205409  | 0.95 | 3.4E-01 | 0 |
| Serum creatinine                                                                       | 51  | 804745  | 1107733 | 201162  | 0.95 | 3.4E-01 | 0 |
| Happiness and subjective well-being - General happiness                                | 1   | 1181195 | 1181195 | 1181195 | 0.95 | 3.4E-01 | 0 |
| Left superior temporal                                                                 | 1   | 1191618 | 1191618 | 1191618 | 0.95 | 3.4E-01 | 0 |
| Lipid::Long chain fatty acid::stearidonate (18:4n3)                                    | 1   | 1181688 | 1181688 | 1181688 | 0.95 | 3.4E-01 | 0 |
| Cancer register - Type of cancer: ICD10: C50 Malignant neoplasm of breast              | 9   | 936240  | 1069450 | 464265  | 0.95 | 3.4E-01 | 0 |
| Never eat eggs, dairy, wheat, sugar: I eat all of the above                            | 11  | 924228  | 1128154 | 624635  | 0.95 | 3.4E-01 | 0 |
| Diagnoses - secondary ICD10: Z92 Personal history of medical treatment                 | 3   | 1053010 | 1791330 | 1049563 | 0.96 | 3.4E-01 | 0 |
| Age hay fever, rhinitis or eczema diagnosed                                            | 24  | 849218  | 1202956 | 498121  | 0.96 | 3.4E-01 | 0 |
| Phospholipids in large HDL                                                             | 9   | 943168  | 1141990 | 818555  | 0.96 | 3.4E-01 | 0 |

|                                                                                                      |     |         |         |         |      |         |   |
|------------------------------------------------------------------------------------------------------|-----|---------|---------|---------|------|---------|---|
| Amino acid::Alanine and aspartate metabolism::alanine                                                | 2   | 1036141 | 1334754 | 737528  | 0.96 | 3.4E-01 | 0 |
| Systolic Blood Pressure                                                                              | 29  | 848045  | 1103473 | 223135  | 0.96 | 3.4E-01 | 0 |
| Triglyceride / High-density lipoprotein cholesterol ratio (at exam 2, GEE, adjusted for age and sex) | 1   | 1183588 | 1183588 | 1183588 | 0.96 | 3.4E-01 | 0 |
| Microalbuminuria                                                                                     | 1   | 1187663 | 1187663 | 1187663 | 0.96 | 3.4E-01 | 0 |
| Glioma                                                                                               | 12  | 899935  | 1304187 | 617321  | 0.96 | 3.3E-01 | 0 |
| Other polyunsaturated fatty acids than 18:2                                                          | 6   | 957164  | 1027002 | 636089  | 0.97 | 3.3E-01 | 0 |
| Mean erythrocyte cell volume                                                                         | 4   | 978601  | 1075023 | 887002  | 0.97 | 3.3E-01 | 0 |
| Follicle stimulating hormone (at exam 3, GEE, adjusted for age and sex)                              | 3   | 1058510 | 1095961 | 563762  | 0.97 | 3.3E-01 | 0 |
| Social support - Leisure/social activities: Sports club or gym                                       | 9   | 948488  | 1036333 | 104020  | 0.97 | 3.3E-01 | 0 |
| Left basal forebrain                                                                                 | 3   | 1065723 | 1487795 | 555382  | 0.97 | 3.3E-01 | 0 |
| Medication for cholesterol, blood pressure or diabetes: Cholesterol lowering medication              | 33  | 833758  | 1047450 | 229329  | 0.97 | 3.3E-01 | 0 |
| EDAR - Tumor necrosis factor receptor superfamily member EDAR                                        | 2   | 1044644 | 1280314 | 808973  | 0.98 | 3.3E-01 | 0 |
| Stem cell growth factor beta                                                                         | 2   | 1044773 | 1117041 | 972504  | 0.98 | 3.3E-01 | 0 |
| Non-cancer illness code, self-reported: hypothyroidism/myxoedema                                     | 75  | 783140  | 1139713 | 327709  | 0.98 | 3.3E-01 | 0 |
| Total lipids in very large HDL                                                                       | 9   | 946993  | 1100265 | 797550  | 0.98 | 3.3E-01 | 0 |
| Lactate dehydrogenase                                                                                | 5   | 1004188 | 1217050 | 617268  | 0.98 | 3.3E-01 | 0 |
| Parkinson Disease                                                                                    | 6   | 956171  | 1299603 | 637970  | 0.99 | 3.2E-01 | 0 |
| CCL4L1 - C-C motif chemokine 4-like                                                                  | 1   | 1196450 | 1196450 | 1196450 | 0.99 | 3.2E-01 | 0 |
| Anxiety disorder (case/control)                                                                      | 1   | 1201733 | 1201733 | 1201733 | 0.99 | 3.2E-01 | 0 |
| Illnesses of father: Bowel cancer                                                                    | 3   | 1064808 | 1233548 | 842486  | 0.99 | 3.2E-01 | 0 |
| Pain type(s) experienced in last month: Knee pain                                                    | 8   | 942316  | 1020380 | 732324  | 0.99 | 3.2E-01 | 0 |
| 4th ventricle                                                                                        | 13  | 918940  | 1192940 | 158949  | 0.99 | 3.2E-01 | 0 |
| Nervous feelings (NERV-FEEL)                                                                         | 35  | 835355  | 1175465 | 235547  | 0.99 | 3.2E-01 | 0 |
| Diagnoses - secondary ICD10: Z82 Family history of certain disabilities and chronic diseases (lea    | 6   | 964495  | 1123575 | 380211  | 0.99 | 3.2E-01 | 0 |
| Illnesses of mother: High blood pressure                                                             | 17  | 892065  | 1073905 | 341380  | 1.00 | 3.2E-01 | 0 |
| TGFBI - Transforming growth factor-beta-induced protein ig-h3                                        | 1   | 1206840 | 1206840 | 1206840 | 1.00 | 3.2E-01 | 0 |
| Impedance measures - Basal metabolic rate                                                            | 583 | 713940  | 1157539 | 106956  | 1.00 | 3.2E-01 | 0 |
| Right isthmus cingulate                                                                              | 3   | 1073430 | 1189656 | 992874  | 1.00 | 3.2E-01 | 0 |
| CFP - Properdin                                                                                      | 1   | 1217590 | 1217590 | 1217590 | 1.01 | 3.1E-01 | 0 |
| CAST - Calpastatin                                                                                   | 1   | 1201003 | 1201003 | 1201003 | 1.01 | 3.1E-01 | 0 |
| Phospholipids in very large HDL                                                                      | 10  | 927768  | 1087011 | 598784  | 1.01 | 3.1E-01 | 0 |
| Rapid alternating stimulus test for letters/numbers                                                  | 1   | 1213078 | 1213078 | 1213078 | 1.01 | 3.1E-01 | 0 |
| MBL2 - Mannose-binding protein C                                                                     | 2   | 1068624 | 1236331 | 900917  | 1.01 | 3.1E-01 | 0 |
| 3rd ventricle                                                                                        | 13  | 921338  | 1065428 | 398773  | 1.01 | 3.1E-01 | 0 |
| Hip circumference (female, adjusted for BMI)                                                         | 54  | 807940  | 1223229 | 189748  | 1.01 | 3.1E-01 | 0 |
| AGRP - Agouti-related protein                                                                        | 1   | 1225853 | 1225853 | 1225853 | 1.02 | 3.1E-01 | 0 |
| Opioids                                                                                              | 2   | 1048161 | 1179488 | 916834  | 1.02 | 3.1E-01 | 0 |
| IL1RAP - Interleukin-1 Receptor accessory protein                                                    | 1   | 1231095 | 1231095 | 1231095 | 1.02 | 3.1E-01 | 0 |
| Rapid automatised naming and rapid alternating stimulus test performance                             | 1   | 1213078 | 1213078 | 1213078 | 1.02 | 3.1E-01 | 0 |
| Illnesses of mother: Diabetes                                                                        | 19  | 889053  | 1137050 | 314279  | 1.02 | 3.1E-01 | 0 |
| Insomnia (female)                                                                                    | 8   | 948676  | 1381783 | 76377   | 1.02 | 3.1E-01 | 0 |
| Number of sleep episodes                                                                             | 19  | 889053  | 973685  | 247575  | 1.02 | 3.1E-01 | 0 |
| Calcium                                                                                              | 13  | 927923  | 1173788 | 602963  | 1.02 | 3.1E-01 | 0 |

|                                                                                                   |     |         |         |         |      |         |   |
|---------------------------------------------------------------------------------------------------|-----|---------|---------|---------|------|---------|---|
| Right inferior parietal                                                                           | 6   | 973244  | 1042853 | 896782  | 1.02 | 3.1E-01 | 0 |
| FCN2 - Ficolin-2                                                                                  | 1   | 1217490 | 1217490 | 1217490 | 1.03 | 3.0E-01 | 0 |
| Rate of decline FEF25-75 (GEE, adjusted for multiple covariates)                                  | 3   | 1081133 | 1268198 | 809241  | 1.03 | 3.0E-01 | 0 |
| Antiglaucoma preparations and miotics                                                             | 11  | 940400  | 1241610 | 149024  | 1.03 | 3.0E-01 | 0 |
| Never eat eggs, dairy, wheat, sugar: Sugar or foods/drinks containing sugar                       | 7   | 991630  | 1132256 | 486269  | 1.03 | 3.0E-01 | 0 |
| Height (female)                                                                                   | 52  | 807424  | 1156217 | 151947  | 1.03 | 3.0E-01 | 0 |
| Frequency of walking for pleasure in last 4 weeks                                                 | 5   | 1025960 | 1286093 | 972390  | 1.03 | 3.0E-01 | 0 |
| Amino acid::Valine, leucine and isoleucine metabolism::valine                                     | 1   | 1226363 | 1226363 | 1226363 | 1.03 | 3.0E-01 | 0 |
| Low-density lipoprotein cholesterol (at exam 1, GEE, adjusted for age and sex)                    | 1   | 1214963 | 1214963 | 1214963 | 1.03 | 3.0E-01 | 0 |
| Right handed                                                                                      | 1   | 1233555 | 1233555 | 1233555 | 1.03 | 3.0E-01 | 0 |
| Symbol digit substitution test - Number of symbol digit matches made correctly                    | 4   | 1003465 | 1162194 | 775033  | 1.03 | 3.0E-01 | 0 |
| POMC - Beta-endorphin                                                                             | 1   | 1234340 | 1234340 | 1234340 | 1.03 | 3.0E-01 | 0 |
| Cryptorchidism (group 2)                                                                          | 5   | 1031778 | 1061213 | 78554   | 1.04 | 3.0E-01 | 0 |
| Irritability (IRR)                                                                                | 35  | 844035  | 1222873 | 187028  | 1.04 | 3.0E-01 | 0 |
| Hemoglobin                                                                                        | 11  | 946020  | 1321773 | 266267  | 1.04 | 3.0E-01 | 0 |
| Diagnoses - secondary ICD10: I20 Angina pectoris                                                  | 12  | 921491  | 1185414 | 543718  | 1.04 | 3.0E-01 | 0 |
| Phosphatidylcholine and other cholines                                                            | 4   | 1008179 | 1067793 | 963848  | 1.04 | 3.0E-01 | 0 |
| Neck width (GEE, female, adjusted for age)                                                        | 2   | 1063098 | 1081666 | 1044529 | 1.04 | 3.0E-01 | 0 |
| Neuroblastoma                                                                                     | 5   | 1027838 | 1050213 | 787600  | 1.04 | 3.0E-01 | 0 |
| Monocyte chemoattractant protein 1 (at exam 7, GEE, adjusted for age and sex)                     | 1   | 1242235 | 1242235 | 1242235 | 1.05 | 2.9E-01 | 0 |
| Osteoarthritis of hip or knee                                                                     | 22  | 874041  | 1222210 | 167860  | 1.05 | 2.9E-01 | 0 |
| Number of days/week walked 10+ minutes                                                            | 10  | 945119  | 1173691 | 89270   | 1.05 | 2.9E-01 | 0 |
| Baldness                                                                                          | 59  | 803585  | 1165716 | 433620  | 1.05 | 2.9E-01 | 0 |
| Total fatty acids                                                                                 | 9   | 970533  | 1097950 | 889053  | 1.05 | 2.9E-01 | 0 |
| Esterified cholesterol                                                                            | 9   | 970533  | 1048933 | 385130  | 1.06 | 2.9E-01 | 0 |
| Monocyte chemoattractant protein 1 (at exam 7, FBAT, adjusted for multivariable)                  | 1   | 1242235 | 1242235 | 1242235 | 1.06 | 2.9E-01 | 0 |
| Amino acid::Valine, leucine and isoleucine metabolism::3-methyl-2-oxobutyrate                     | 1   | 1226363 | 1226363 | 1226363 | 1.06 | 2.9E-01 | 0 |
| Diagnoses - main ICD10: R07 Pain in throat and chest                                              | 1   | 1246235 | 1246235 | 1246235 | 1.07 | 2.9E-01 | 0 |
| Mean FEV1/FVC from exam 3 and 5 (GEE, adjusted for multiple covariates)                           | 2   | 1078585 | 1172401 | 984769  | 1.07 | 2.9E-01 | 0 |
| Current tobacco smoking                                                                           | 11  | 957335  | 1211318 | 260396  | 1.07 | 2.8E-01 | 0 |
| ::::X-12728                                                                                       | 1   | 1244233 | 1244233 | 1244233 | 1.07 | 2.8E-01 | 0 |
| OmegaL6 fatty acids                                                                               | 7   | 1001603 | 1073441 | 677831  | 1.07 | 2.8E-01 | 0 |
| Anterior corona radiata radial diuivities                                                         | 9   | 975900  | 1268678 | 466160  | 1.07 | 2.8E-01 | 0 |
| ::::X-09789                                                                                       | 2   | 1078950 | 1149318 | 1008583 | 1.08 | 2.8E-01 | 0 |
| Ratio of visceral-tosubcutaneous adipose tissue volume                                            | 3   | 1109360 | 1275428 | 607840  | 1.08 | 2.8E-01 | 0 |
| Types of physical activity in last 4 weeks: Heavy DIY (eg: weeding, lawn mowing, carpentry, diggi | 6   | 983833  | 1250692 | 846796  | 1.08 | 2.8E-01 | 0 |
| Gastric cancer                                                                                    | 4   | 1026389 | 1326258 | 716506  | 1.08 | 2.8E-01 | 0 |
| CCL28 - C-C motif chemokine 28                                                                    | 1   | 1241580 | 1241580 | 1241580 | 1.08 | 2.8E-01 | 0 |
| Carbohydrate::Glycolysis, gluconeogenesis, pyruvate metabolism::1,6-anhydroglucose                | 1   | 1260335 | 1260335 | 1260335 | 1.08 | 2.8E-01 | 0 |
| Cutaneous T-cell attracting (CCL27)                                                               | 3   | 1103595 | 1213264 | 564904  | 1.08 | 2.8E-01 | 0 |
| Lipid::Carnitine metabolism::acetylcarnitine                                                      | 1   | 1255280 | 1255280 | 1255280 | 1.08 | 2.8E-01 | 0 |
| Hair colour (natural, before greying): Black                                                      | 148 | 762259  | 1158253 | 99273   | 1.08 | 2.8E-01 | 0 |
| Ratio of bisLallylic bonds to total fatty acids in lipids                                         | 2   | 1083444 | 1358406 | 808482  | 1.09 | 2.8E-01 | 0 |

|                                                                       |     |         |         |         |      |         |   |
|-----------------------------------------------------------------------|-----|---------|---------|---------|------|---------|---|
| Superior longitudinal fasciculus mode of anisotropy                   | 1   | 1255143 | 1255143 | 1255143 | 1.09 | 2.8E-01 | 0 |
| High-density lipoprotein - Birth cohorts                              | 4   | 1025219 | 1240917 | 912017  | 1.09 | 2.7E-01 | 0 |
| Illnesses of father: Chronic bronchitis/emphysema                     | 4   | 1026484 | 1485056 | 431966  | 1.09 | 2.7E-01 | 0 |
| Illnesses of father: High blood pressure                              | 9   | 985248  | 1091518 | 479195  | 1.09 | 2.7E-01 | 0 |
| Lipid::Carnitine metabolism::2-tetradecenoyl carnitine                | 1   | 1255280 | 1255280 | 1255280 | 1.09 | 2.7E-01 | 0 |
| Amino acid::Guanidino and acetamido metabolism::4-acetamidobutanoate  | 2   | 1078410 | 1149521 | 1007299 | 1.10 | 2.7E-01 | 0 |
| Doctor diagnosed hayfever or allergic rhinitis                        | 21  | 896303  | 1174765 | 476268  | 1.10 | 2.7E-01 | 0 |
| Right inferior temporal                                               | 2   | 1086555 | 1407824 | 765286  | 1.10 | 2.7E-01 | 0 |
| Hematocrit                                                            | 16  | 913133  | 1317203 | 374489  | 1.10 | 2.7E-01 | 0 |
| ::::X-10395                                                           | 1   | 1267410 | 1267410 | 1267410 | 1.10 | 2.7E-01 | 0 |
| Mean platelet volume (two-way meta)                                   | 147 | 763848  | 1170245 | 323021  | 1.11 | 2.7E-01 | 0 |
| ::::X-10429                                                           | 1   | 1267410 | 1267410 | 1267410 | 1.11 | 2.7E-01 | 0 |
| Lipid::Carnitine metabolism::decanoylcarnitine                        | 3   | 1112685 | 1138233 | 825368  | 1.11 | 2.7E-01 | 0 |
| RARRES2 - Retinoic acid receptor responder protein 2                  | 1   | 1266463 | 1266463 | 1266463 | 1.11 | 2.7E-01 | 0 |
| Amount of alcohol drunk on a typical drinking day                     | 6   | 999435  | 1344179 | 841460  | 1.12 | 2.6E-01 | 0 |
| ERAP1 - Endoplasmic reticulum aminopeptidase 1                        | 1   | 1264990 | 1264990 | 1264990 | 1.12 | 2.6E-01 | 0 |
| ASAH2 - Neutral ceramidase                                            | 1   | 1275198 | 1275198 | 1275198 | 1.12 | 2.6E-01 | 0 |
| Amino acid::Cysteine, methionine, SAM, taurine metabolism::methionine | 1   | 1270505 | 1270505 | 1270505 | 1.12 | 2.6E-01 | 0 |
| C-reactive protein - Birth cohorts                                    | 2   | 1100296 | 1377998 | 822594  | 1.12 | 2.6E-01 | 0 |
| IGFBP7 - Insulin-like growth factor-binding protein 7                 | 1   | 1272163 | 1272163 | 1272163 | 1.12 | 2.6E-01 | 0 |
| Total phosphoglycerides                                               | 6   | 1008179 | 1111728 | 950479  | 1.12 | 2.6E-01 | 0 |
| Parkinson's disease age at onset                                      | 1   | 1275658 | 1275658 | 1275658 | 1.13 | 2.6E-01 | 0 |
| Epstein Barr Virus antigen EBNA seropositivity                        | 1   | 1266218 | 1266218 | 1266218 | 1.13 | 2.6E-01 | 0 |
| Left cerebellum white matter                                          | 11  | 977470  | 1141903 | 675613  | 1.13 | 2.6E-01 | 0 |
| Resistin (GEE, adjusted for age and sex)                              | 3   | 1133978 | 1200203 | 861174  | 1.13 | 2.6E-01 | 0 |
| High light scatter percentage of red cells (two-way meta)             | 103 | 783420  | 1135919 | 194959  | 1.14 | 2.6E-01 | 0 |
| IMPDH1 - Inosine-5'-monophosphate dehydrogenase 1                     | 3   | 1129118 | 1327356 | 1095680 | 1.14 | 2.6E-01 | 0 |
| CD109 - CD109 antigen                                                 | 1   | 1288055 | 1288055 | 1288055 | 1.14 | 2.6E-01 | 0 |
| Nervous feelings                                                      | 30  | 868378  | 1199436 | 373306  | 1.14 | 2.6E-01 | 0 |
| Treatment/medication code: atenolol                                   | 7   | 1027155 | 1152028 | 631976  | 1.14 | 2.5E-01 | 0 |
| Neutrophil count (two-way meta)                                       | 68  | 806130  | 1222529 | 97643   | 1.14 | 2.5E-01 | 0 |
| Illnesses of siblings: Diabetes                                       | 7   | 1027155 | 1168869 | 957019  | 1.14 | 2.5E-01 | 0 |
| Alanine aminotransferase                                              | 21  | 905515  | 1113980 | 392805  | 1.14 | 2.5E-01 | 0 |
| Reticulocyte count (two-way meta)                                     | 110 | 778138  | 1085710 | 132467  | 1.14 | 2.5E-01 | 0 |
| Neovascular disease                                                   | 10  | 966043  | 1142473 | 580831  | 1.15 | 2.5E-01 | 0 |
| Type 2 Diabetes (adjusted for BMI)                                    | 153 | 763233  | 1077243 | 353550  | 1.15 | 2.5E-01 | 0 |
| Waist circumference (male)                                            | 23  | 898940  | 1300483 | 499163  | 1.15 | 2.5E-01 | 0 |
| Schizophrenia                                                         | 193 | 755908  | 1223613 | 128092  | 1.16 | 2.5E-01 | 0 |
| Cigarettes per day                                                    | 19  | 922358  | 1098394 | 322805  | 1.16 | 2.5E-01 | 0 |
| Nucleotide::Purine metabolism, urate metabolism::urate                | 1   | 1294678 | 1294678 | 1294678 | 1.16 | 2.5E-01 | 0 |
| Lipid::Long chain fatty acid::10-nonadecenoate (19:1n9)               | 1   | 1301655 | 1301655 | 1301655 | 1.17 | 2.4E-01 | 0 |
| Antimigraine preparations                                             | 12  | 956521  | 1305876 | 419438  | 1.17 | 2.4E-01 | 0 |
| Aspartate aminotransferase (at exam 2, GEE, adjusted for age and sex) | 1   | 1311795 | 1311795 | 1311795 | 1.17 | 2.4E-01 | 0 |

|                                                                                 |     |         |         |         |      |         |   |
|---------------------------------------------------------------------------------|-----|---------|---------|---------|------|---------|---|
| Cereal intake                                                                   | 27  | 889053  | 1246224 | 83385   | 1.17 | 2.4E-01 | 0 |
| Growth regulated oncogene (CXCL1)                                               | 2   | 1120801 | 1195424 | 1046178 | 1.17 | 2.4E-01 | 0 |
| .....X-12704                                                                    | 1   | 1285133 | 1285133 | 1285133 | 1.17 | 2.4E-01 | 0 |
| Illnesses of mother: Heart disease                                              | 2   | 1122575 | 1258228 | 986923  | 1.18 | 2.4E-01 | 0 |
| Male-specific factors - Hair/balding pattern: Pattern 1                         | 166 | 764678  | 1093732 | 345728  | 1.18 | 2.4E-01 | 0 |
| DAPK2 - Death-associated protein kinase 2                                       | 1   | 1305810 | 1305810 | 1305810 | 1.19 | 2.4E-01 | 0 |
| Lipid::Long chain fatty acid::oleate (18:1n9)                                   | 1   | 1301655 | 1301655 | 1301655 | 1.19 | 2.4E-01 | 0 |
| Neuroticism (univariate)                                                        | 72  | 807849  | 1108384 | 503082  | 1.19 | 2.3E-01 | 0 |
| Fed-up feelings                                                                 | 27  | 889275  | 1346724 | 93923   | 1.19 | 2.3E-01 | 0 |
| Paternal history of Alzheimer's disease                                         | 2   | 1126449 | 1245147 | 1007751 | 1.19 | 2.3E-01 | 0 |
| CXCL5 - C-X-C motif chemokine 5                                                 | 1   | 1298125 | 1298125 | 1298125 | 1.19 | 2.3E-01 | 0 |
| Mean corpuscular volume (three-way meta)                                        | 162 | 765151  | 1153711 | 202809  | 1.19 | 2.3E-01 | 0 |
| Mental distress - Ever sought or received professional help for mental distress | 2   | 1129539 | 1134594 | 1124483 | 1.19 | 2.3E-01 | 0 |
| Low-density lipoprotein - Birth cohorts                                         | 3   | 1152513 | 1276488 | 940048  | 1.19 | 2.3E-01 | 0 |
| Excessive hairiness                                                             | 3   | 1145635 | 1332681 | 912813  | 1.19 | 2.3E-01 | 0 |
| Total lipids in IDL                                                             | 13  | 970533  | 1055113 | 385130  | 1.20 | 2.3E-01 | 0 |
| Irritability                                                                    | 34  | 869086  | 1230843 | 195670  | 1.20 | 2.3E-01 | 0 |
| SPINT2 - Kunitz-type protease inhibitor 2                                       | 1   | 1313543 | 1313543 | 1313543 | 1.21 | 2.3E-01 | 0 |
| Right fusiform                                                                  | 1   | 1317115 | 1317115 | 1317115 | 1.21 | 2.3E-01 | 0 |
| HMG CoA reductase inhibitors                                                    | 58  | 826156  | 1142679 | 194463  | 1.21 | 2.3E-01 | 0 |
| Strenuous sports or other exercises                                             | 12  | 966571  | 1341801 | 557027  | 1.21 | 2.3E-01 | 0 |
| High light scatter reticulocyte count (two-way meta)                            | 98  | 791799  | 1131342 | 261510  | 1.21 | 2.2E-01 | 0 |
| Left entorhinal                                                                 | 4   | 1068055 | 1685108 | 392550  | 1.22 | 2.2E-01 | 0 |
| Free cholesterol in IDL                                                         | 11  | 996508  | 1132234 | 84490   | 1.22 | 2.2E-01 | 0 |
| Autism spectrum disorder                                                        | 3   | 1164070 | 1190443 | 970190  | 1.22 | 2.2E-01 | 0 |
| Coronary artery disease in diabetes                                             | 1   | 1335308 | 1335308 | 1335308 | 1.23 | 2.2E-01 | 0 |
| C7 - Complement component C7                                                    | 2   | 1140420 | 1208021 | 1072819 | 1.23 | 2.2E-01 | 0 |
| IL6ST - Interleukin-6 receptor subunit beta                                     | 1   | 1329585 | 1329585 | 1329585 | 1.23 | 2.2E-01 | 0 |
| Daytime dozing / sleeping (narcolepsy)                                          | 26  | 897286  | 1134078 | 242213  | 1.23 | 2.2E-01 | 0 |
| Ever smoked regularly                                                           | 100 | 793695  | 1193218 | 160938  | 1.23 | 2.2E-01 | 0 |
| Sleep sedentary                                                                 | 5   | 1102738 | 1605853 | 759793  | 1.23 | 2.2E-01 | 0 |
| Triglycerides in IDL                                                            | 12  | 976043  | 1106157 | 705657  | 1.23 | 2.2E-01 | 0 |
| Trail making test - Duration to complete alphanumeric path (trail #2)           | 8   | 1011706 | 1550558 | 847574  | 1.23 | 2.2E-01 | 0 |
| Heel bone mineral density                                                       | 308 | 741698  | 1114096 | 149482  | 1.23 | 2.2E-01 | 0 |
| CST7 - Cystatin-F                                                               | 1   | 1331835 | 1331835 | 1331835 | 1.24 | 2.2E-01 | 0 |
| Cingulum (hippocampus) radial diffusivities                                     | 1   | 1347053 | 1347053 | 1347053 | 1.24 | 2.2E-01 | 0 |
| Peptide::Dipeptide::X-14205--alpha-glutamyltyrosine                             | 2   | 1143096 | 1212176 | 1074017 | 1.24 | 2.2E-01 | 0 |
| Xenobiotics::Xanthine metabolism::1-methylurate                                 | 1   | 1346083 | 1346083 | 1346083 | 1.24 | 2.1E-01 | 0 |
| Job involves heavy manual or physical work                                      | 8   | 1018508 | 1274003 | 561957  | 1.24 | 2.1E-01 | 0 |
| Amino acid::Butanoate metabolism::2-aminobutyrate                               | 2   | 1149435 | 1207090 | 1091780 | 1.25 | 2.1E-01 | 0 |
| CXCL11 - C-X-C motif chemokine 11                                               | 1   | 1336048 | 1336048 | 1336048 | 1.25 | 2.1E-01 | 0 |
| Taking other prescription medications                                           | 10  | 994278  | 1603742 | 489303  | 1.26 | 2.1E-01 | 0 |
| Standing height                                                                 | 876 | 715844  | 1114119 | 124907  | 1.26 | 2.1E-01 | 0 |

|                                                                                                  |     |         |         |         |      |         |   |
|--------------------------------------------------------------------------------------------------|-----|---------|---------|---------|------|---------|---|
| Free cholesterol in very large HDL                                                               | 10  | 997120  | 1266549 | 669396  | 1.26 | 2.1E-01 | 0 |
| Skin fluorescence                                                                                | 1   | 1346083 | 1346083 | 1346083 | 1.27 | 2.1E-01 | 0 |
| Amino acid::Urea cycle; arginine-, proline-, metabolism::proline                                 | 2   | 1151220 | 1207369 | 1095071 | 1.27 | 2.0E-01 | 0 |
| Bread intake                                                                                     | 16  | 951480  | 1685187 | 120441  | 1.27 | 2.0E-01 | 0 |
| Right accumbens area                                                                             | 6   | 1055123 | 1240547 | 763986  | 1.27 | 2.0E-01 | 0 |
| Non-cancer illness code, self-reported: asthma                                                   | 51  | 848655  | 1136361 | 228042  | 1.27 | 2.0E-01 | 0 |
| Male-specific factors - Hair/balding pattern: Pattern 3                                          | 40  | 864370  | 1164823 | 210260  | 1.27 | 2.0E-01 | 0 |
| Insulin sensitivity index (adjusted for age, sex, Bmi)                                           | 1   | 1353228 | 1353228 | 1353228 | 1.28 | 2.0E-01 | 0 |
| CXCL1 - Growth-regulated alpha protein                                                           | 1   | 1355818 | 1355818 | 1355818 | 1.28 | 2.0E-01 | 0 |
| Diagnoses - main ICD10: H26 Other cataract                                                       | 6   | 1048938 | 1397449 | 342022  | 1.28 | 2.0E-01 | 0 |
| NAGK - N-acetyl-D-glucosamine kinase                                                             | 1   | 1346420 | 1346420 | 1346420 | 1.28 | 2.0E-01 | 0 |
| Coffee type: Ground coffee (include espresso, filter etc)                                        | 17  | 960338  | 1291558 | 407690  | 1.29 | 2.0E-01 | 0 |
| Peptide::Dipeptide::X-12244--N-acetylcarnosine                                                   | 3   | 1191685 | 1234166 | 1125289 | 1.29 | 2.0E-01 | 0 |
| Bipolar disorder                                                                                 | 12  | 984339  | 1212962 | 495684  | 1.30 | 2.0E-01 | 0 |
| Impedance measures - Leg fat-free mass (left)                                                    | 515 | 728210  | 1145316 | 113642  | 1.30 | 1.9E-01 | 0 |
| Plateletcrit (two-way meta)                                                                      | 129 | 786968  | 1097068 | 338498  | 1.30 | 1.9E-01 | 0 |
| White matter                                                                                     | 10  | 1017278 | 1266022 | 618400  | 1.30 | 1.9E-01 | 0 |
| DPT - Dermatopontin                                                                              | 1   | 1368958 | 1368958 | 1368958 | 1.30 | 1.9E-01 | 0 |
| Energy::Krebs cycle::citrate                                                                     | 4   | 1108011 | 1261512 | 879573  | 1.30 | 1.9E-01 | 0 |
| PDK1 - [Pyruvate dehydrogenase (acetyl-transferring)] kinase isozyme 1, mitochondrial            | 1   | 1372680 | 1372680 | 1372680 | 1.30 | 1.9E-01 | 0 |
| ::::X-12556                                                                                      | 1   | 1361353 | 1361353 | 1361353 | 1.31 | 1.9E-01 | 0 |
| Duration of walks                                                                                | 5   | 1121600 | 1341578 | 757313  | 1.31 | 1.9E-01 | 0 |
| Superior fronto-occipital fasciculus axial diusivities                                           | 1   | 1381228 | 1381228 | 1381228 | 1.31 | 1.9E-01 | 0 |
| Ever smoked                                                                                      | 41  | 869535  | 1255143 | 96500   | 1.31 | 1.9E-01 | 0 |
| NKeff:%314-R7-                                                                                   | 1   | 1371008 | 1371008 | 1371008 | 1.32 | 1.9E-01 | 0 |
| Neuroticism score                                                                                | 72  | 823763  | 1246051 | 393650  | 1.32 | 1.9E-01 | 0 |
| Blood clot, DVT, bronchitis, emphysema, asthma, rhinitis, eczema, allergy diagnosed by doctor: A | 66  | 830396  | 1120137 | 217690  | 1.32 | 1.9E-01 | 0 |
| Leptin (adjusted for BMI)                                                                        | 2   | 1159548 | 1169260 | 1149835 | 1.32 | 1.9E-01 | 0 |
| Anilides                                                                                         | 7   | 1088348 | 1271423 | 553504  | 1.32 | 1.9E-01 | 0 |
| Mania - Ever had period extreme irritability                                                     | 1   | 1360448 | 1360448 | 1360448 | 1.33 | 1.8E-01 | 0 |
| Sagittal stratum fractional anisotropy                                                           | 6   | 1070869 | 1154893 | 876299  | 1.33 | 1.8E-01 | 0 |
| Xenobiotics::Drug::metoprolol acid metabolite*                                                   | 1   | 1381228 | 1381228 | 1381228 | 1.33 | 1.8E-01 | 0 |
| Types of physical activity in last 4 weeks: Strenuous sports                                     | 4   | 1107429 | 1337814 | 688202  | 1.33 | 1.8E-01 | 0 |
| Impedance measures - Trunk fat percentage                                                        | 352 | 744063  | 1170616 | 102215  | 1.33 | 1.8E-01 | 0 |
| IDUA - alpha-L-iduronidase                                                                       | 1   | 1390215 | 1390215 | 1390215 | 1.33 | 1.8E-01 | 0 |
| NKearly:%335+314-                                                                                | 1   | 1371008 | 1371008 | 1371008 | 1.33 | 1.8E-01 | 0 |
| TEK - Angiopoietin-1 receptor, soluble                                                           | 1   | 1386483 | 1386483 | 1386483 | 1.33 | 1.8E-01 | 0 |
| Left caudate                                                                                     | 8   | 1049194 | 1116236 | 901826  | 1.34 | 1.8E-01 | 0 |
| Illnesses of mother: Severe depression                                                           | 1   | 1401083 | 1401083 | 1401083 | 1.34 | 1.8E-01 | 0 |
| Sum eosinophil basophil count (three-way meta)                                                   | 125 | 791080  | 1089978 | 159373  | 1.34 | 1.8E-01 | 0 |
| Diuretics                                                                                        | 72  | 827005  | 1110203 | 341408  | 1.35 | 1.8E-01 | 0 |
| Non-cancer illness code, self-reported: high cholesterol                                         | 48  | 860018  | 1209234 | 392902  | 1.35 | 1.8E-01 | 0 |
| Amino acid::Phenylalanine & tyrosine metabolism::tyrosine                                        | 3   | 1217793 | 1366889 | 864193  | 1.35 | 1.8E-01 | 0 |

|                                                                             |     |         |         |         |      |         |   |
|-----------------------------------------------------------------------------|-----|---------|---------|---------|------|---------|---|
| Femoral Neck BMD (males)                                                    | 1   | 1384985 | 1384985 | 1384985 | 1.35 | 1.8E-01 | 0 |
| Average weekly red wine intake                                              | 5   | 1131905 | 1158533 | 831242  | 1.35 | 1.8E-01 | 0 |
| Illnesses of mother: Alzheimer's disease/dementia                           | 2   | 1183306 | 1273576 | 1093037 | 1.35 | 1.8E-01 | 0 |
| Maternal history of Alzheimer's disease                                     | 2   | 1183306 | 1273576 | 1093037 | 1.36 | 1.8E-01 | 0 |
| Length of mobile phone use                                                  | 21  | 948435  | 1247098 | 119511  | 1.36 | 1.8E-01 | 0 |
| Right pericalcarine                                                         | 3   | 1220193 | 1407921 | 1160199 | 1.36 | 1.7E-01 | 0 |
| Heart rate increase                                                         | 15  | 997005  | 1280579 | 671900  | 1.36 | 1.7E-01 | 0 |
| Posterior limb of internal capsule radial diuivities                        | 8   | 1050655 | 1283801 | 532716  | 1.36 | 1.7E-01 | 0 |
| RET - Proto-oncogene tyrosine-protein kinase receptor Ret                   | 1   | 1393185 | 1393185 | 1393185 | 1.36 | 1.7E-01 | 0 |
| Vasodilators used in cardiac diseases                                       | 1   | 1393880 | 1393880 | 1393880 | 1.36 | 1.7E-01 | 0 |
| C-reactive protein                                                          | 14  | 988990  | 1190721 | 318864  | 1.37 | 1.7E-01 | 0 |
| Lean body mass (whole body)                                                 | 1   | 1408560 | 1408560 | 1408560 | 1.37 | 1.7E-01 | 0 |
| Mood swings                                                                 | 36  | 888069  | 1397594 | 231215  | 1.37 | 1.7E-01 | 0 |
| Estimated BMD                                                               | 194 | 768539  | 1158503 | 209888  | 1.37 | 1.7E-01 | 0 |
| Impedance measures - Body fat percentage                                    | 389 | 741980  | 1148463 | 108235  | 1.37 | 1.7E-01 | 0 |
| Corticospinal tract mean diuivities                                         | 2   | 1196910 | 1206223 | 1187598 | 1.37 | 1.7E-01 | 0 |
| Fractures                                                                   | 16  | 976246  | 1276098 | 548429  | 1.38 | 1.7E-01 | 0 |
| Lumbar Spine BMD (females)                                                  | 20  | 953276  | 1213724 | 385099  | 1.38 | 1.7E-01 | 0 |
| Neuroticism sum score                                                       | 92  | 812364  | 1268068 | 187236  | 1.38 | 1.7E-01 | 0 |
| Uncinate fasciculus mode of anisotropy                                      | 1   | 1409495 | 1409495 | 1409495 | 1.38 | 1.7E-01 | 0 |
| Loneliness                                                                  | 12  | 1010251 | 1348374 | 156278  | 1.39 | 1.7E-01 | 0 |
| Diastolic Blood Pressure                                                    | 24  | 935636  | 1244447 | 407697  | 1.39 | 1.6E-01 | 0 |
| Illnesses of father: Diabetes                                               | 19  | 975063  | 1239001 | 472826  | 1.39 | 1.6E-01 | 0 |
| :::X-13671                                                                  | 1   | 1432335 | 1432335 | 1432335 | 1.40 | 1.6E-01 | 0 |
| Posterior corona radiata mean diuivities                                    | 1   | 1423275 | 1423275 | 1423275 | 1.40 | 1.6E-01 | 0 |
| Lipid::Long chain fatty acid::stearate (18:0)                               | 2   | 1207385 | 1254520 | 1160250 | 1.40 | 1.6E-01 | 0 |
| MMSE score (at age 65, GEE, adjusted for multivariable)                     | 3   | 1238728 | 1355005 | 915233  | 1.40 | 1.6E-01 | 0 |
| Treatment/medication code: amlodipine                                       | 15  | 1005775 | 1356610 | 769329  | 1.40 | 1.6E-01 | 0 |
| Amino acid::Valine, leucine and isoleucine metabolism::2-hydroxyisobutyrate | 3   | 1233350 | 1380466 | 1152186 | 1.40 | 1.6E-01 | 0 |
| Risk taking                                                                 | 16  | 982553  | 1272574 | 294044  | 1.40 | 1.6E-01 | 0 |
| Hip circumference (adjusted for BMI)                                        | 102 | 810285  | 1126301 | 248288  | 1.41 | 1.6E-01 | 0 |
| Childhood Absence Epilepsy                                                  | 2   | 1201125 | 1328860 | 1073390 | 1.41 | 1.6E-01 | 0 |
| Weekly usage of mobile phone in last 3 months                               | 8   | 1059716 | 1351618 | 1000390 | 1.41 | 1.6E-01 | 0 |
| Mood swings (MOOD)                                                          | 40  | 888069  | 1370185 | 132709  | 1.41 | 1.6E-01 | 0 |
| TNFSF8 - Tumor necrosis factor ligand superfamily member 8                  | 1   | 1440178 | 1440178 | 1440178 | 1.42 | 1.6E-01 | 0 |
| Glucose - Birth cohorts                                                     | 1   | 1422368 | 1422368 | 1422368 | 1.42 | 1.6E-01 | 0 |
| Long-standing illness, disability or infirmity                              | 12  | 1021243 | 1503525 | 508155  | 1.42 | 1.6E-01 | 0 |
| ECM1 - Extracellular matrix protein 1                                       | 1   | 1438543 | 1438543 | 1438543 | 1.42 | 1.6E-01 | 0 |
| NID1 - Nidogen-1                                                            | 1   | 1427540 | 1427540 | 1427540 | 1.42 | 1.5E-01 | 0 |
| Pericardial adipose tissue volume                                           | 2   | 1218301 | 1348081 | 1088522 | 1.42 | 1.5E-01 | 0 |
| Non-cancer illness code, self-reported: hypertension                        | 151 | 788825  | 1139530 | 161005  | 1.43 | 1.5E-01 | 0 |
| Impedance measures - Leg predicted mass (left)                              | 513 | 735633  | 1170118 | 114349  | 1.43 | 1.5E-01 | 0 |
| Waist-hip ratio (female, adjusted for BMI)                                  | 42  | 884941  | 1215864 | 470843  | 1.43 | 1.5E-01 | 0 |

|                                                                                          |     |         |         |         |      |         |   |
|------------------------------------------------------------------------------------------|-----|---------|---------|---------|------|---------|---|
| Amino acid::Urea cycle; arginine-, proline-, metabolism::dimethylarginine (SDMA + ADMA)  | 1   | 1443173 | 1443173 | 1443173 | 1.44 | 1.5E-01 | 0 |
| Vascular/heart problems diagnosed by doctor: High blood pressure                         | 189 | 776138  | 1124403 | 174418  | 1.44 | 1.5E-01 | 0 |
| Lumbar Spine BMD                                                                         | 38  | 894429  | 1223609 | 403358  | 1.44 | 1.5E-01 | 0 |
| Uric acid                                                                                | 21  | 963458  | 1223408 | 70411   | 1.44 | 1.5E-01 | 0 |
| PR interval                                                                              | 7   | 1119863 | 1212410 | 889086  | 1.44 | 1.5E-01 | 0 |
| Milk type used: Full cream                                                               | 4   | 1148098 | 1407964 | 742005  | 1.44 | 1.5E-01 | 0 |
| Loneliness, isolation                                                                    | 4   | 1141716 | 1363014 | 813379  | 1.45 | 1.5E-01 | 0 |
| IL7R - Interleukin-7 receptor subunit alpha                                              | 1   | 1439100 | 1439100 | 1439100 | 1.45 | 1.5E-01 | 0 |
| Low-density lipoprotein cholesterol                                                      | 77  | 833758  | 1278630 | 471527  | 1.45 | 1.5E-01 | 0 |
| Ease of getting up in the morning                                                        | 53  | 866553  | 1234990 | 187736  | 1.45 | 1.5E-01 | 0 |
| NK:%Eff                                                                                  | 1   | 1454618 | 1454618 | 1454618 | 1.45 | 1.5E-01 | 0 |
| Depressive affect subcluster                                                             | 58  | 855294  | 1307893 | 220314  | 1.45 | 1.5E-01 | 0 |
| IGF2R - Cation-independent mannose-6-phosphate receptor                                  | 1   | 1455465 | 1455465 | 1455465 | 1.47 | 1.4E-01 | 0 |
| Right insula                                                                             | 5   | 1176590 | 1426355 | 854958  | 1.47 | 1.4E-01 | 0 |
| Amyotrophic lateral sclerosis (logistic)                                                 | 3   | 1263588 | 1334358 | 675340  | 1.47 | 1.4E-01 | 0 |
| Estimated bone mineral density from heel ultrasounds                                     | 517 | 736918  | 1128618 | 201271  | 1.47 | 1.4E-01 | 0 |
| Vitamin and mineral supplements: Vitamin D                                               | 1   | 1466193 | 1466193 | 1466193 | 1.47 | 1.4E-01 | 0 |
| FUT3 - Galactoside 3(4)-L-fucosyltransferase                                             | 1   | 1464083 | 1464083 | 1464083 | 1.47 | 1.4E-01 | 0 |
| Valine                                                                                   | 3   | 1264745 | 1382799 | 1153795 | 1.48 | 1.4E-01 | 0 |
| Diagnoses - secondary ICD10: I10 Essential (primary) hypertension                        | 82  | 831810  | 1139037 | 359159  | 1.48 | 1.4E-01 | 0 |
| CD163 - Scavenger receptor cysteine-rich type 1 protein M130                             | 1   | 1464448 | 1464448 | 1464448 | 1.49 | 1.4E-01 | 0 |
| Tense / 'highly strung' (TENSE)                                                          | 20  | 976814  | 1202053 | 345118  | 1.49 | 1.4E-01 | 0 |
| Adenocarcinoma (adjusted for age)                                                        | 4   | 1160283 | 1346019 | 942873  | 1.49 | 1.4E-01 | 0 |
| High-density lipoprotein 3 cholesterol (at exam 5, GEE, adjusted for multivariable)      | 1   | 1455263 | 1455263 | 1455263 | 1.49 | 1.4E-01 | 0 |
| CD8:%39+                                                                                 | 1   | 1480198 | 1480198 | 1480198 | 1.50 | 1.3E-01 | 0 |
| Reticulocyte fraction of red cells (two-way meta)                                        | 108 | 816821  | 1102706 | 264560  | 1.50 | 1.3E-01 | 0 |
| Plateletcrit (three-way meta)                                                            | 163 | 786968  | 1148721 | 331799  | 1.51 | 1.3E-01 | 0 |
| Ankylosing spondylitis                                                                   | 16  | 1009141 | 1215242 | 412496  | 1.51 | 1.3E-01 | 0 |
| Alcohol consumption                                                                      | 1   | 1484388 | 1484388 | 1484388 | 1.51 | 1.3E-01 | 0 |
| Neck/shoulder pain for 3+ months                                                         | 1   | 1477533 | 1477533 | 1477533 | 1.51 | 1.3E-01 | 0 |
| Mean corpuscular hemoglobin concentration                                                | 35  | 924508  | 1191553 | 170161  | 1.52 | 1.3E-01 | 0 |
| Frequency of unenthusiasm / disinterest in last 2 weeks                                  | 4   | 1168816 | 1387924 | 801984  | 1.52 | 1.3E-01 | 0 |
| Chronotype                                                                               | 168 | 788309  | 1169536 | 120038  | 1.52 | 1.3E-01 | 0 |
| High frequency power HRV (cohort exam 18 offspring exam 3, GEE, adjusted for age and HR) | 1   | 1491978 | 1491978 | 1491978 | 1.52 | 1.3E-01 | 0 |
| Bread type: White                                                                        | 13  | 1051725 | 1229118 | 114657  | 1.52 | 1.3E-01 | 0 |
| Right caudate                                                                            | 6   | 1129000 | 1171759 | 1021284 | 1.53 | 1.3E-01 | 0 |
| Lipid::Inositol metabolism::myo-inositol                                                 | 2   | 1247600 | 1248508 | 1246693 | 1.53 | 1.3E-01 | 0 |
| Illnesses of siblings: High blood pressure                                               | 15  | 1035558 | 1242953 | 388766  | 1.53 | 1.3E-01 | 0 |
| SAA1 - Serum amyloid A-1 protein                                                         | 1   | 1485705 | 1485705 | 1485705 | 1.54 | 1.2E-01 | 0 |
| CD8:%SCM                                                                                 | 1   | 1489373 | 1489373 | 1489373 | 1.54 | 1.2E-01 | 0 |
| Male pattern baldness (BOLT LMM infinitesimal mixed model)                               | 326 | 757014  | 1093209 | 242427  | 1.54 | 1.2E-01 | 0 |
| Residual from predicted FEF25-75 for latest exam (GEE, adjusted for multiple covariates) | 3   | 1295718 | 1347703 | 950311  | 1.54 | 1.2E-01 | 0 |
| IL19 - Interleukin-19                                                                    | 2   | 1248780 | 1609211 | 888349  | 1.55 | 1.2E-01 | 0 |



|                                                                                              |     |         |         |         |      |         |   |
|----------------------------------------------------------------------------------------------|-----|---------|---------|---------|------|---------|---|
| Lipid::Medium chain fatty acid::heptanoate (7:0)                                             | 2   | 1267661 | 1356518 | 1178804 | 1.56 | 1.2E-01 | 0 |
| Impedance measures - Leg predicted mass (right)                                              | 525 | 740235  | 1158053 | 111811  | 1.56 | 1.2E-01 | 0 |
| ::::X-12850                                                                                  | 2   | 1267595 | 1350481 | 1184709 | 1.56 | 1.2E-01 | 0 |
| Breastfed as a baby                                                                          | 1   | 1504390 | 1504390 | 1504390 | 1.56 | 1.2E-01 | 0 |
| CCL5 - C-C motif chemokine 5                                                                 | 1   | 1496075 | 1496075 | 1496075 | 1.57 | 1.2E-01 | 0 |
| Neuroticism                                                                                  | 152 | 798790  | 1187466 | 226861  | 1.57 | 1.2E-01 | 0 |
| Waist-hip ratio (female <= 50 yrs, adjusted for BMI)                                         | 9   | 1131123 | 1348585 | 792000  | 1.57 | 1.2E-01 | 0 |
| Non-cancer illness code, self-reported: eczema/dermatitis                                    | 12  | 1063461 | 1186424 | 731673  | 1.57 | 1.2E-01 | 0 |
| ::::X-12696                                                                                  | 2   | 1265263 | 1684281 | 846244  | 1.57 | 1.2E-01 | 0 |
| Right putamen                                                                                | 10  | 1084045 | 1411990 | 235232  | 1.58 | 1.1E-01 | 0 |
| Amyotrophic lateral sclerosis (linear mixed model)                                           | 5   | 1224425 | 1263588 | 1174275 | 1.58 | 1.1E-01 | 0 |
| Ratio of visceral-tosubcutaneous adipose tissue volume (female)                              | 1   | 1505643 | 1505643 | 1505643 | 1.58 | 1.1E-01 | 0 |
| Leg pain on walking                                                                          | 1   | 1525045 | 1525045 | 1525045 | 1.58 | 1.1E-01 | 0 |
| Impedance measures - Arm fat-free mass (left)                                                | 553 | 740420  | 1170118 | 104035  | 1.58 | 1.1E-01 | 0 |
| AGT - Angiotensinogen                                                                        | 1   | 1516068 | 1516068 | 1516068 | 1.59 | 1.1E-01 | 0 |
| Shaft Section Modulus (GEE, female, adjsusted for multivariable)                             | 1   | 1527753 | 1527753 | 1527753 | 1.59 | 1.1E-01 | 0 |
| Drinks per day                                                                               | 28  | 952556  | 1272131 | 87686   | 1.59 | 1.1E-01 | 0 |
| Lipid::Medium chain fatty acid::laurate (12:0)                                               | 2   | 1276010 | 1437755 | 1114265 | 1.60 | 1.1E-01 | 0 |
| General risk tolerance                                                                       | 24  | 978341  | 1113830 | 548938  | 1.60 | 1.1E-01 | 0 |
| Body Mass Index (Dominance deviation model)                                                  | 1   | 1527753 | 1527753 | 1527753 | 1.60 | 1.1E-01 | 0 |
| Myeloid white cell count (two-way meta)                                                      | 82  | 845603  | 1210711 | 119599  | 1.61 | 1.1E-01 | 0 |
| Lipid::Bile acid metabolism::deoxycholate                                                    | 1   | 1529150 | 1529150 | 1529150 | 1.61 | 1.1E-01 | 0 |
| Fluid intelligence test - Number of fluid intelligence questions attempted within time limit | 9   | 1137883 | 1319015 | 160094  | 1.61 | 1.1E-01 | 0 |
| Hip circumference (male, adjusted for BMI)                                                   | 38  | 922968  | 1252582 | 141925  | 1.62 | 1.1E-01 | 0 |
| Lipid::Carnitine metabolism::hexanoylcarnitine                                               | 4   | 1200301 | 1352965 | 830523  | 1.62 | 1.1E-01 | 0 |
| Diagnoses - secondary ICD10: Z72 Problems related to lifestyle                               | 1   | 1529998 | 1529998 | 1529998 | 1.62 | 1.1E-01 | 0 |
| REL1 - Tumor necrosis factor receptor superfamily member 19L                                 | 1   | 1537180 | 1537180 | 1537180 | 1.62 | 1.1E-01 | 0 |
| Biliary atresia                                                                              | 3   | 1330175 | 1602635 | 1157248 | 1.62 | 1.0E-01 | 0 |
| TNFAIP6 - Tumor necrosis factor-inducible gene 6 protein                                     | 1   | 1543070 | 1543070 | 1543070 | 1.63 | 1.0E-01 | 0 |
| Alcohol intake versus 10 years previously                                                    | 10  | 1101795 | 1591109 | 794321  | 1.63 | 1.0E-01 | 0 |
| Alzheimer's disease                                                                          | 11  | 1109820 | 1196119 | 576701  | 1.63 | 1.0E-01 | 0 |
| Galactosylation                                                                              | 8   | 1131278 | 1199662 | 845010  | 1.64 | 1.0E-01 | 0 |
| Arms-arm fat ratio (male)                                                                    | 34  | 942438  | 1231051 | 222527  | 1.64 | 1.0E-01 | 0 |
| Frequency of tiredness / lethargy in last 2 weeks                                            | 21  | 1011308 | 1222053 | 398010  | 1.64 | 1.0E-01 | 0 |
| CNTN5 - Contactin-5                                                                          | 1   | 1536328 | 1536328 | 1536328 | 1.64 | 1.0E-01 | 0 |
| Adiponectin level                                                                            | 11  | 1111730 | 1281746 | 589694  | 1.64 | 1.0E-01 | 0 |
| PLAU - Urokinase-type plasminogen activator                                                  | 1   | 1547740 | 1547740 | 1547740 | 1.65 | 1.0E-01 | 0 |
| Treatment/medication code: glucosamine product                                               | 1   | 1558458 | 1558458 | 1558458 | 1.65 | 1.0E-01 | 0 |
| Generalised epilepsy                                                                         | 10  | 1098946 | 1325679 | 772659  | 1.65 | 9.9E-02 | 0 |
| Transport type for commuting to job workplace: Cycle                                         | 1   | 1559753 | 1559753 | 1559753 | 1.65 | 9.8E-02 | 0 |
| Left inferior parietal                                                                       | 4   | 1214493 | 1386809 | 799920  | 1.66 | 9.7E-02 | 0 |
| Sialylation                                                                                  | 3   | 1343885 | 1737911 | 1089655 | 1.66 | 9.7E-02 | 0 |
| Total cholesterol in medium HDL                                                              | 5   | 1249520 | 1391218 | 889053  | 1.66 | 9.7E-02 | 0 |

|                                                         |     |         |         |         |      |         |   |
|---------------------------------------------------------|-----|---------|---------|---------|------|---------|---|
| Red blood cell count (three-way meta)                   | 132 | 812140  | 1141739 | 281164  | 1.67 | 9.5E-02 | 0 |
| Parkinson disease of sibling pairs (tier 1)             | 17  | 1047335 | 1358525 | 557648  | 1.67 | 9.5E-02 | 0 |
| Thyroid preparations                                    | 99  | 839208  | 1173291 | 436561  | 1.68 | 9.3E-02 | 0 |
| Sum basophil neutrophil count (two-way meta)            | 71  | 865400  | 1231061 | 101524  | 1.68 | 9.2E-02 | 0 |
| Lumbar Spine BMD (males)                                | 3   | 1356720 | 1525356 | 936653  | 1.69 | 9.1E-02 | 0 |
| Past tobacco smoking                                    | 65  | 876990  | 1208848 | 87778   | 1.69 | 9.1E-02 | 0 |
| Time spend outdoors in summer                           | 47  | 914723  | 1164664 | 103434  | 1.69 | 9.1E-02 | 0 |
| Peptide::gamma-glutamyl::gamma-glutamylvaline           | 1   | 1565210 | 1565210 | 1565210 | 1.69 | 9.0E-02 | 0 |
| Impedance measures - Arm predicted mass (right)         | 526 | 745993  | 1162627 | 108436  | 1.69 | 9.0E-02 | 0 |
| Osteoarthritis (self reported)                          | 1   | 1573255 | 1573255 | 1573255 | 1.70 | 8.8E-02 | 0 |
| Fraction of accelerations                               | 2   | 1315089 | 1408074 | 1222103 | 1.71 | 8.8E-02 | 0 |
| Sum neutrophil eosinophil count (two-way meta)          | 77  | 865400  | 1216848 | 169561  | 1.71 | 8.7E-02 | 0 |
| Calcium channel blockers                                | 82  | 858356  | 1221251 | 317506  | 1.72 | 8.6E-02 | 0 |
| Treatment/medication code: paracetamol                  | 4   | 1243300 | 1426584 | 1081704 | 1.72 | 8.6E-02 | 0 |
| Late pubertal growth                                    | 1   | 1588765 | 1588765 | 1588765 | 1.72 | 8.6E-02 | 0 |
| CD4:%Treg(39+73-)                                       | 1   | 1592028 | 1592028 | 1592028 | 1.72 | 8.6E-02 | 0 |
| Well-being spectrum                                     | 129 | 820555  | 1240205 | 126968  | 1.72 | 8.6E-02 | 0 |
| Serum Urate                                             | 23  | 1015240 | 1329810 | 453078  | 1.72 | 8.5E-02 | 0 |
| Superior fronto-occipital fasciculus radial diuivities  | 2   | 1332534 | 1489222 | 1175846 | 1.73 | 8.4E-02 | 0 |
| CD4:%Treg(39+)                                          | 1   | 1592028 | 1592028 | 1592028 | 1.73 | 8.4E-02 | 0 |
| Light smokers, at least 100 smokes in lifetime          | 2   | 1328129 | 1415968 | 1240289 | 1.73 | 8.3E-02 | 0 |
| Diastolic Blood Pressure (automated reading)            | 194 | 796325  | 1152338 | 139206  | 1.73 | 8.3E-02 | 0 |
| Waist-hip ratio (female > 50 yrs, adjusted for BMI)     | 13  | 1109360 | 1305485 | 743133  | 1.73 | 8.3E-02 | 0 |
| CD39 on CD4 T                                           | 1   | 1611068 | 1611068 | 1611068 | 1.74 | 8.2E-02 | 0 |
| Drugs used in diabetes                                  | 45  | 922743  | 1007783 | 353550  | 1.74 | 8.1E-02 | 0 |
| Tanner scale                                            | 1   | 1613123 | 1613123 | 1613123 | 1.74 | 8.1E-02 | 0 |
| Right pallidum                                          | 14  | 1080873 | 1448788 | 982972  | 1.75 | 8.0E-02 | 0 |
| Fasting insulin main effect                             | 3   | 1382225 | 1433306 | 1214708 | 1.75 | 7.9E-02 | 0 |
| Major depressive disorder (ICD-coded)                   | 1   | 1604963 | 1604963 | 1604963 | 1.76 | 7.9E-02 | 0 |
| Impedance measures - Leg fat percentage (right)         | 378 | 761860  | 1166589 | 211315  | 1.76 | 7.8E-02 | 0 |
| Triglycerides cholesterol                               | 61  | 895060  | 1138703 | 417360  | 1.76 | 7.8E-02 | 0 |
| Monogalactosylation                                     | 2   | 1335314 | 1733626 | 937002  | 1.77 | 7.8E-02 | 0 |
| FVC                                                     | 398 | 761659  | 1180471 | 212957  | 1.77 | 7.7E-02 | 0 |
| Number of cigarettes previously smoked daily            | 2   | 1347998 | 1502146 | 1193849 | 1.77 | 7.6E-02 | 0 |
| Triglycerides - Birth cohorts                           | 1   | 1633368 | 1633368 | 1633368 | 1.77 | 7.6E-02 | 0 |
| Fucosylation                                            | 2   | 1335314 | 1733626 | 937002  | 1.78 | 7.6E-02 | 0 |
| Impedance measures - Leg fat-free mass (right)          | 517 | 750835  | 1173203 | 114014  | 1.78 | 7.6E-02 | 0 |
| Rheumatoid Arthritis                                    | 66  | 886414  | 1181998 | 439329  | 1.78 | 7.6E-02 | 0 |
| Sensitivity / hurt feelings                             | 30  | 984788  | 1155241 | 102087  | 1.78 | 7.5E-02 | 0 |
| White blood cell count (three-way meta)                 | 121 | 832258  | 1216848 | 241180  | 1.78 | 7.4E-02 | 0 |
| ALPL - Alkaline phosphatase, tissue-nonspecific isozyme | 1   | 1633185 | 1633185 | 1633185 | 1.79 | 7.4E-02 | 0 |
| Diagnoses - secondary ICD10: K44 Diaphragmatic hernia   | 3   | 1398910 | 1434606 | 1106865 | 1.79 | 7.4E-02 | 0 |
| Amino acid::Tryptophan metabolism::kynurenine           | 2   | 1332175 | 1733535 | 930815  | 1.79 | 7.4E-02 | 0 |

|                                                                                                      |     |         |         |         |      |         |   |
|------------------------------------------------------------------------------------------------------|-----|---------|---------|---------|------|---------|---|
| Schizophrenia vs Bipolar disorder                                                                    | 75  | 873278  | 1273734 | 166938  | 1.79 | 7.3E-02 | 0 |
| Tense / 'highly strung'                                                                              | 21  | 1039700 | 1240205 | 773518  | 1.79 | 7.3E-02 | 0 |
| Impedance measures - Trunk fat-free mass                                                             | 640 | 743453  | 1189853 | 138389  | 1.79 | 7.3E-02 | 0 |
| Types of physical activity in last 4 weeks: Walking for pleasure (not as a means of transport)       | 3   | 1400850 | 1478315 | 752347  | 1.79 | 7.3E-02 | 0 |
| Impedance measures - Trunk predicted mass                                                            | 640 | 743453  | 1192461 | 145750  | 1.80 | 7.3E-02 | 0 |
| LY9 - T-lymphocyte surface antigen Ly-9                                                              | 1   | 1614420 | 1614420 | 1614420 | 1.80 | 7.2E-02 | 0 |
| Impedance measures - Body Mass Index (BMI)                                                           | 401 | 763488  | 1183325 | 244295  | 1.80 | 7.2E-02 | 0 |
| Pyruvate                                                                                             | 1   | 1633368 | 1633368 | 1633368 | 1.80 | 7.1E-02 | 0 |
| Low-density lipoprotein particle size by NMR (at exam 4, GEE, adjusted for multivariable)            | 2   | 1353031 | 1661883 | 1044179 | 1.81 | 7.0E-02 | 0 |
| Medication for pain relief, constipation, heartburn: Paracetamol                                     | 9   | 1193768 | 1440695 | 1061773 | 1.81 | 7.0E-02 | 0 |
| Carbohydrate::Fructose, mannose, galactose, starch, and sucrose metabolism::mannose                  | 1   | 1633368 | 1633368 | 1633368 | 1.81 | 7.0E-02 | 0 |
| Depressive symptoms                                                                                  | 11  | 1162908 | 1220804 | 457311  | 1.81 | 7.0E-02 | 0 |
| Hematocrit (two-way meta)                                                                            | 91  | 859663  | 1147904 | 245206  | 1.82 | 7.0E-02 | 0 |
| Impedance measures - Arm fat-free mass (right)                                                       | 527 | 751563  | 1188536 | 110709  | 1.84 | 6.6E-02 | 0 |
| Mean corpuscular hemoglobin concentration (two-way meta)                                             | 43  | 949068  | 1230773 | 543046  | 1.84 | 6.6E-02 | 0 |
| Pubertal growth                                                                                      | 1   | 1642628 | 1642628 | 1642628 | 1.85 | 6.5E-02 | 0 |
| PDE5A - cGMP-specific 3',5'-cyclic phosphodiesterase                                                 | 1   | 1653040 | 1653040 | 1653040 | 1.85 | 6.5E-02 | 0 |
| Mother's age                                                                                         | 2   | 1362870 | 1561574 | 1164166 | 1.86 | 6.3E-02 | 0 |
| Total cholesterol / High-density lipoprotein cholesterol ratio (at exam 1, GEE, adjusted for multiva | 1   | 1655515 | 1655515 | 1655515 | 1.86 | 6.3E-02 | 0 |
| Amino acid::Valine, leucine and isoleucine metabolism::4-methyl-2-oxopentanoate                      | 2   | 1364501 | 1433571 | 1295432 | 1.86 | 6.3E-02 | 0 |
| IL1RL2 - Interleukin-1 receptor-like 2                                                               | 1   | 1661675 | 1661675 | 1661675 | 1.86 | 6.2E-02 | 0 |
| Type 2 Diabetes                                                                                      | 417 | 763233  | 1115525 | 357085  | 1.87 | 6.1E-02 | 0 |
| Amino acid::Amino fatty acid::X-12510--2-aminooctanoic acid                                          | 2   | 1378240 | 1449574 | 1306906 | 1.88 | 6.1E-02 | 0 |
| FEV1/FVC ratio                                                                                       | 478 | 757640  | 1155103 | 162547  | 1.88 | 6.0E-02 | 0 |
| CD4:%Treg(73+)                                                                                       | 1   | 1680665 | 1680665 | 1680665 | 1.88 | 6.0E-02 | 0 |
| CD4:%Treg(39-73+)                                                                                    | 1   | 1680665 | 1680665 | 1680665 | 1.88 | 6.0E-02 | 0 |
| Treatment/medication code: atorvastatin                                                              | 16  | 1097148 | 1162892 | 741303  | 1.88 | 6.0E-02 | 0 |
| Time spent outdoors in winter                                                                        | 11  | 1181195 | 1235116 | 555412  | 1.88 | 5.9E-02 | 0 |
| Age at first birth                                                                                   | 8   | 1209933 | 1261298 | 869150  | 1.90 | 5.7E-02 | 0 |
| Granulocyte count (two-way meta)                                                                     | 76  | 889219  | 1232085 | 248232  | 1.91 | 5.7E-02 | 0 |
| Overall activity                                                                                     | 2   | 1395661 | 1403164 | 1388158 | 1.92 | 5.5E-02 | 0 |
| Left putamen                                                                                         | 9   | 1231710 | 1265200 | 1042845 | 1.92 | 5.5E-02 | 0 |
| Platelet count (two-way meta)                                                                        | 141 | 832258  | 1144778 | 151916  | 1.92 | 5.5E-02 | 0 |
| :::X-12063                                                                                           | 4   | 1313896 | 1412121 | 926203  | 1.93 | 5.4E-02 | 0 |
| Proxy and clinically diagnosed Alzheimer's disease                                                   | 33  | 998360  | 1277675 | 127536  | 1.93 | 5.4E-02 | 0 |
| Hair colour (natural, before greying): Blonde                                                        | 124 | 844196  | 1116346 | 253876  | 1.94 | 5.2E-02 | 0 |
| Sensitivity / hurt feelings (HURT)                                                                   | 26  | 1034370 | 1155241 | 311621  | 1.95 | 5.2E-02 | 0 |
| Monocyte chemoattractant protein 1 (at exam 7, GEE, adjusted for multivariable)                      | 2   | 1401405 | 1480990 | 1321820 | 1.95 | 5.1E-02 | 0 |
| Impedance measures - Arm predicted mass (left)                                                       | 548 | 754924  | 1172258 | 129881  | 1.95 | 5.1E-02 | 0 |
| EPHA1 - Ephrin type-A receptor 1                                                                     | 1   | 1697610 | 1697610 | 1697610 | 1.95 | 5.1E-02 | 0 |
| Waist-hip ratio (adjusted for BMI)                                                                   | 60  | 916700  | 1301019 | 420873  | 1.95 | 5.1E-02 | 0 |
| Platelet count (three-way meta)                                                                      | 171 | 821920  | 1174625 | 212250  | 1.95 | 5.1E-02 | 0 |
| Frequent insomnia symptoms                                                                           | 40  | 970969  | 1204728 | 282681  | 1.96 | 4.9E-02 | 0 |

|                                                                                                |     |         |         |         |      |         |   |
|------------------------------------------------------------------------------------------------|-----|---------|---------|---------|------|---------|---|
| Height (male)                                                                                  | 38  | 981094  | 1174986 | 303788  | 1.97 | 4.9E-02 | 0 |
| Impedance measures - Whole body fat-free mass                                                  | 631 | 751563  | 1188323 | 123781  | 1.97 | 4.9E-02 | 0 |
| Sleeplessness / insomnia                                                                       | 28  | 1022165 | 1090000 | 490857  | 1.97 | 4.9E-02 | 0 |
| Juvenile Myoclonic Epilepsy (JME)                                                              | 1   | 1725310 | 1725310 | 1725310 | 1.98 | 4.8E-02 | 0 |
| Amino acid::Valine, leucine and isoleucine metabolism::3-methyl-2-oxovalerate                  | 2   | 1429865 | 1531616 | 1328114 | 1.99 | 4.7E-02 | 0 |
| Able to confide                                                                                | 8   | 1230328 | 1433348 | 842774  | 1.99 | 4.7E-02 | 0 |
| Fornix (cres) / Stria terminalis radial diuivities                                             | 2   | 1420088 | 1560780 | 1279395 | 2.00 | 4.6E-02 | 0 |
| Amyotrophic lateral sclerosis (LMM)                                                            | 4   | 1334358 | 1863639 | 969464  | 2.00 | 4.6E-02 | 0 |
| Coronary artery disease and triglyceride (bivariate)                                           | 125 | 850163  | 1055668 | 388948  | 2.00 | 4.6E-02 | 0 |
| Genu of corpus callosum fractional anisotropy                                                  | 5   | 1377788 | 1381305 | 577610  | 2.00 | 4.5E-02 | 0 |
| Neuroticism (MA GWAMA)                                                                         | 138 | 840680  | 1297067 | 433145  | 2.00 | 4.5E-02 | 0 |
| Left pallidum                                                                                  | 12  | 1174571 | 1424523 | 1031357 | 2.00 | 4.5E-02 | 0 |
| Impedance measures - Impedance of whole body                                                   | 495 | 762915  | 1174960 | 133896  | 2.01 | 4.5E-02 | 0 |
| Mean platelet volume (three-way meta)                                                          | 156 | 829454  | 1151882 | 276298  | 2.01 | 4.4E-02 | 0 |
| Cerebellar vermal lobules VIII X                                                               | 25  | 1063038 | 1375498 | 596680  | 2.02 | 4.4E-02 | 0 |
| Platelet count                                                                                 | 75  | 897073  | 1147104 | 415343  | 2.02 | 4.3E-02 | 0 |
| Extreme Height                                                                                 | 49  | 955428  | 1164553 | 345608  | 2.02 | 4.3E-02 | 0 |
| Left inferior temporal                                                                         | 2   | 1438299 | 1493834 | 1382763 | 2.03 | 4.2E-02 | 0 |
| Age at menarche                                                                                | 254 | 798183  | 1153408 | 326588  | 2.04 | 4.1E-02 | 0 |
| Superior fronto-occipital fasciculus mean diuivities                                           | 3   | 1499188 | 1602503 | 1468346 | 2.05 | 4.1E-02 | 0 |
| Age first had sexual intercourse                                                               | 90  | 884554  | 1258953 | 444909  | 2.05 | 4.0E-02 | 0 |
| Impedance measures - Whole body fat mass                                                       | 416 | 772084  | 1141230 | 141360  | 2.05 | 4.0E-02 | 0 |
| Epilepsy                                                                                       | 4   | 1357533 | 1549868 | 1062998 | 2.06 | 3.9E-02 | 0 |
| FGF2 - Fibroblast growth factor 2                                                              | 1   | 1783258 | 1783258 | 1783258 | 2.06 | 3.9E-02 | 0 |
| Sum eosinophil basophil count (two-way meta)                                                   | 104 | 874868  | 1138026 | 238267  | 2.07 | 3.9E-02 | 0 |
| Large low-density lipoprotein by NMR (at exam 4, GEE, adjusted for age and sex)                | 1   | 1766975 | 1766975 | 1766975 | 2.07 | 3.8E-02 | 0 |
| Right middle temporal                                                                          | 1   | 1772910 | 1772910 | 1772910 | 2.08 | 3.8E-02 | 0 |
| Impedance measures - Weight                                                                    | 534 | 762673  | 1167138 | 139750  | 2.08 | 3.8E-02 | 0 |
| Total body BMD (45-60 years old)                                                               | 16  | 1143158 | 1458020 | 525667  | 2.09 | 3.7E-02 | 0 |
| Carbohydrate::Aminosugars metabolism::erythronate*                                             | 3   | 1516068 | 1629749 | 1335585 | 2.09 | 3.6E-02 | 0 |
| Phospholipids in medium HDL                                                                    | 4   | 1363576 | 1384329 | 1155333 | 2.11 | 3.5E-02 | 0 |
| Medication for cholesterol, blood pressure, diabetes, or take exogenous hormones: Blood pressu | 76  | 912393  | 1185896 | 201241  | 2.12 | 3.4E-02 | 0 |
| Hemoglobin concentration (two-way meta)                                                        | 85  | 896078  | 1134575 | 465000  | 2.12 | 3.4E-02 | 0 |
| Weight                                                                                         | 549 | 763615  | 1183063 | 164584  | 2.14 | 3.2E-02 | 0 |
| Free cholesterol in medium HDL                                                                 | 4   | 1386433 | 1415448 | 1183306 | 2.16 | 3.1E-02 | 0 |
| Red cell distribution width (three-way meta)                                                   | 119 | 870308  | 1173549 | 307930  | 2.17 | 3.0E-02 | 0 |
| Job involves mainly walking or standing                                                        | 10  | 1245224 | 1470354 | 973370  | 2.18 | 2.9E-02 | 0 |
| Amino acid::Histidine metabolism::histidine                                                    | 1   | 1843255 | 1843255 | 1843255 | 2.19 | 2.8E-02 | 0 |
| Mean corpuscular hemoglobin concentration (three-way meta)                                     | 61  | 949068  | 1246753 | 557063  | 2.19 | 2.8E-02 | 0 |
| Fed-up feelings (FED_UP)                                                                       | 28  | 1072941 | 1317129 | 510283  | 2.21 | 2.7E-02 | 0 |
| Type 1 Diabetes                                                                                | 78  | 916961  | 1193800 | 379350  | 2.21 | 2.7E-02 | 0 |
| Impedance measures - Arm fat percentage (right)                                                | 357 | 788650  | 1198243 | 156515  | 2.21 | 2.7E-02 | 0 |
| Impedance measures - Arm fat mass (right)                                                      | 317 | 795785  | 1190990 | 319590  | 2.22 | 2.6E-02 | 0 |

|                                                                                         |     |         |         |         |      |         |   |
|-----------------------------------------------------------------------------------------|-----|---------|---------|---------|------|---------|---|
| Poultry intake                                                                          | 12  | 1226236 | 1249541 | 393457  | 2.23 | 2.6E-02 | 0 |
| Pain type(s) experienced in last month: Headache                                        | 31  | 1061773 | 1216263 | 200157  | 2.25 | 2.4E-02 | 0 |
| Large low-density lipoprotein by NMR (at exam 4, GEE, adjusted for multivariable)       | 2   | 1511128 | 1639051 | 1383204 | 2.26 | 2.4E-02 | 0 |
| White blood cell count (two-way meta)                                                   | 104 | 889219  | 1272826 | 322686  | 2.26 | 2.4E-02 | 0 |
| Impedance measures - Impedance of arm (left)                                            | 426 | 783736  | 1189558 | 155748  | 2.28 | 2.3E-02 | 0 |
| Family history of Alzheimer's disease                                                   | 6   | 1365889 | 1602587 | 1348568 | 2.28 | 2.3E-02 | 0 |
| Diagnoses - main ICD10: M23 Internal derangement of knee                                | 1   | 1884003 | 1884003 | 1884003 | 2.29 | 2.2E-02 | 0 |
| Impedance measures - Impedance of arm (right)                                           | 420 | 784519  | 1167779 | 151590  | 2.30 | 2.1E-02 | 0 |
| Waist-hip ratio (female)                                                                | 293 | 806353  | 1157218 | 379398  | 2.31 | 2.1E-02 | 0 |
| Impedance measures - Arm fat percentage (left)                                          | 364 | 793465  | 1177763 | 240071  | 2.32 | 2.1E-02 | 0 |
| Impedance measures - Arm fat mass (left)                                                | 300 | 803375  | 1180508 | 374714  | 2.32 | 2.1E-02 | 0 |
| Estimated glomerular filtration rate                                                    | 459 | 779760  | 1148385 | 262656  | 2.32 | 2.1E-02 | 0 |
| Birth weight of first child (female)                                                    | 40  | 1026731 | 1303378 | 134069  | 2.34 | 1.9E-02 | 0 |
| Eczema                                                                                  | 10  | 1296890 | 1401259 | 492823  | 2.35 | 1.9E-02 | 0 |
| Waist-hip ratio (male)                                                                  | 133 | 873133  | 1210258 | 318705  | 2.35 | 1.9E-02 | 0 |
| IL16 - Interleukin-16                                                                   | 1   | 1904160 | 1904160 | 1904160 | 2.35 | 1.9E-02 | 0 |
| Smoking status: Never                                                                   | 65  | 963830  | 1307260 | 123532  | 2.37 | 1.8E-02 | 0 |
| Lactate                                                                                 | 2   | 1566465 | 1599916 | 1533014 | 2.38 | 1.7E-02 | 0 |
| Waist-hip ratio (adjusted for BMI, female)                                              | 317 | 806353  | 1140565 | 265245  | 2.42 | 1.5E-02 | 0 |
| Red cell distribution width (two-way meta)                                              | 105 | 906293  | 1212675 | 276643  | 2.43 | 1.5E-02 | 0 |
| IL1B - Interleukin-1 beta                                                               | 1   | 1969643 | 1969643 | 1969643 | 2.43 | 1.5E-02 | 0 |
| BMP10 - Bone morphogenetic protein 10                                                   | 1   | 1969643 | 1969643 | 1969643 | 2.44 | 1.5E-02 | 0 |
| Waist circumference (female, adjusted for BMI)                                          | 36  | 1069156 | 1223924 | 760473  | 2.44 | 1.5E-02 | 0 |
| Alanine                                                                                 | 4   | 1476583 | 1625281 | 1015272 | 2.45 | 1.4E-02 | 0 |
| COLEC11 - Collectin-11                                                                  | 1   | 1969643 | 1969643 | 1969643 | 2.46 | 1.4E-02 | 0 |
| Impedance measures - Leg fat mass (left)                                                | 343 | 805280  | 1170864 | 156766  | 2.46 | 1.4E-02 | 0 |
| Fasting insulin main effect (adjusted for BMI)                                          | 9   | 1391218 | 1518550 | 936215  | 2.47 | 1.4E-02 | 0 |
| Depressive symptoms (MA GWAMA)                                                          | 118 | 894703  | 1299175 | 446739  | 2.47 | 1.3E-02 | 0 |
| Hair (Straight/curly)                                                                   | 1   | 1981195 | 1981195 | 1981195 | 2.48 | 1.3E-02 | 0 |
| Birth weight                                                                            | 162 | 868386  | 1151339 | 307451  | 2.48 | 1.3E-02 | 0 |
| Waist circumference                                                                     | 372 | 801440  | 1191453 | 297668  | 2.48 | 1.3E-02 | 0 |
| NACA - Nascent polypeptide-associated complex subunit alpha                             | 1   | 1969643 | 1969643 | 1969643 | 2.48 | 1.3E-02 | 0 |
| Low-density lipoprotein particle size by NMR (at exam 4, GEE, adjusted for age and sex) | 1   | 1970735 | 1970735 | 1970735 | 2.49 | 1.3E-02 | 0 |
| Femoral Neck BMD (females)                                                              | 10  | 1349605 | 1404806 | 992534  | 2.53 | 1.1E-02 | 0 |
| Intelligence                                                                            | 197 | 852238  | 1183653 | 97955   | 2.56 | 1.0E-02 | 0 |
| Why stopped smoking: Health precaution                                                  | 2   | 1648120 | 2260548 | 1035693 | 2.60 | 9.3E-03 | 0 |
| Ever smoker                                                                             | 161 | 873400  | 1234615 | 159386  | 2.60 | 9.2E-03 | 0 |
| PRSS2 - Trypsin-2                                                                       | 1   | 2039865 | 2039865 | 2039865 | 2.62 | 8.7E-03 | 0 |
| Impedance measures - Whole body water mass                                              | 635 | 778098  | 1193205 | 134399  | 2.66 | 7.8E-03 | 0 |
| Hemoglobin concentration (three-way meta)                                               | 95  | 941758  | 1314673 | 365079  | 2.66 | 7.8E-03 | 0 |
| Impedance measures - Leg fat percentage (left)                                          | 389 | 805280  | 1193700 | 183401  | 2.66 | 7.8E-03 | 0 |
| Hematocrit (three-way meta)                                                             | 83  | 963458  | 1265828 | 339836  | 2.67 | 7.5E-03 | 0 |
| Excessive sweating                                                                      | 2   | 1686329 | 1737813 | 1634844 | 2.71 | 6.8E-03 | 0 |

|                                           |      |         |         |         |      |         |   |
|-------------------------------------------|------|---------|---------|---------|------|---------|---|
| Monosialylation                           | 1    | 2131938 | 2131938 | 2131938 | 2.76 | 5.8E-03 | 0 |
| Getting up in morning                     | 52   | 1038246 | 1241453 | 185757  | 2.77 | 5.6E-03 | 0 |
| Impedance measures - Leg fat mass (right) | 341  | 823015  | 1190990 | 232272  | 2.81 | 4.9E-03 | 0 |
| Sleep duration                            | 104  | 946296  | 1238599 | 343410  | 2.86 | 4.3E-03 | 0 |
| Red blood cell count (two-way meta)       | 121  | 925328  | 1219650 | 489015  | 2.86 | 4.3E-03 | 0 |
| Hip circumference                         | 436  | 810475  | 1208070 | 195594  | 2.88 | 4.0E-03 | 0 |
| High blood pressure                       | 235  | 858543  | 1126979 | 237043  | 2.89 | 3.8E-03 | 0 |
| Salt added to food                        | 72   | 1011131 | 1252551 | 476143  | 2.91 | 3.7E-03 | 0 |
| Body Mass Index (female)                  | 453  | 813918  | 1172715 | 364585  | 3.04 | 2.4E-03 | 0 |
| FEV1                                      | 406  | 826861  | 1198660 | 317436  | 3.15 | 1.6E-03 | 0 |
| Waist-hip ratio (adjusted for BMI, male)  | 128  | 954580  | 1197550 | 273060  | 3.24 | 1.2E-03 | 0 |
| Waist-hip ratio                           | 465  | 825688  | 1157315 | 344535  | 3.31 | 9.2E-04 | 0 |
| Waist circumference (adjusted for BMI)    | 89   | 1036333 | 1250248 | 550950  | 3.49 | 4.9E-04 | 0 |
| Age at last live birth (female)           | 1    | 2660000 | 2660000 | 2660000 | 3.74 | 1.8E-04 | 0 |
| Body Mass Index                           | 1671 | 794265  | 1180003 | 210393  | 4.96 | 6.9E-07 | 1 |
| Height                                    | 1693 | 811305  | 1161105 | 308065  | 5.75 | 9.1E-09 | 1 |
